# Supplementary material
Source: PubMed Central journal article supplement (PMC9004380)
Supplement: aem.02407-21-s0001.pdf [file aem.02407-21-s0001.pdf]

Supplemental material: figures S1 – S19 and table S1

***Methanosaeta* and *Candidatus Velamenicoccus archaeovor***

Jana Kizina<sup>a</sup>, Sebastian F. A. Jordan<sup>a</sup>, Gerrit Alexander Martens<sup>a</sup>, Almud Lonsing<sup>a</sup>,  
Christina Probian<sup>a</sup>, Androniki Kolovou<sup>b</sup>, Rachel Santarella-Mellwig<sup>b</sup>, Erhard Rhiel<sup>c</sup>,  
Sten Littmann<sup>a</sup>, Stephanie Markert<sup>d</sup>, Kurt Stüber<sup>e</sup>, Michael Richter<sup>a</sup>, Thomas Schweder<sup>d</sup>  
and Jens Harder<sup>a#</sup>

<sup>a</sup>Max Planck Institute for Marine Microbiology, Bremen, Germany

<sup>b</sup>Electron Microscopy Core Facility, EMBL Heidelberg, Heidelberg, Germany

<sup>c</sup>Institute for Chemistry and Biology of the Marine Environment, Carl von Ossietzky  
University of Oldenburg, Oldenburg, Germany

<sup>d</sup>Department of Pharmaceutical Biotechnology, Institute for Pharmacy, University of  
Greifswald, Germany

<sup>e</sup>Max Planck-Genome-centre Cologne, Cologne, Germany

# Address correspondence to Jens Harder: [jharder@mpi-bremen.de](mailto:jharder@mpi-bremen.de)

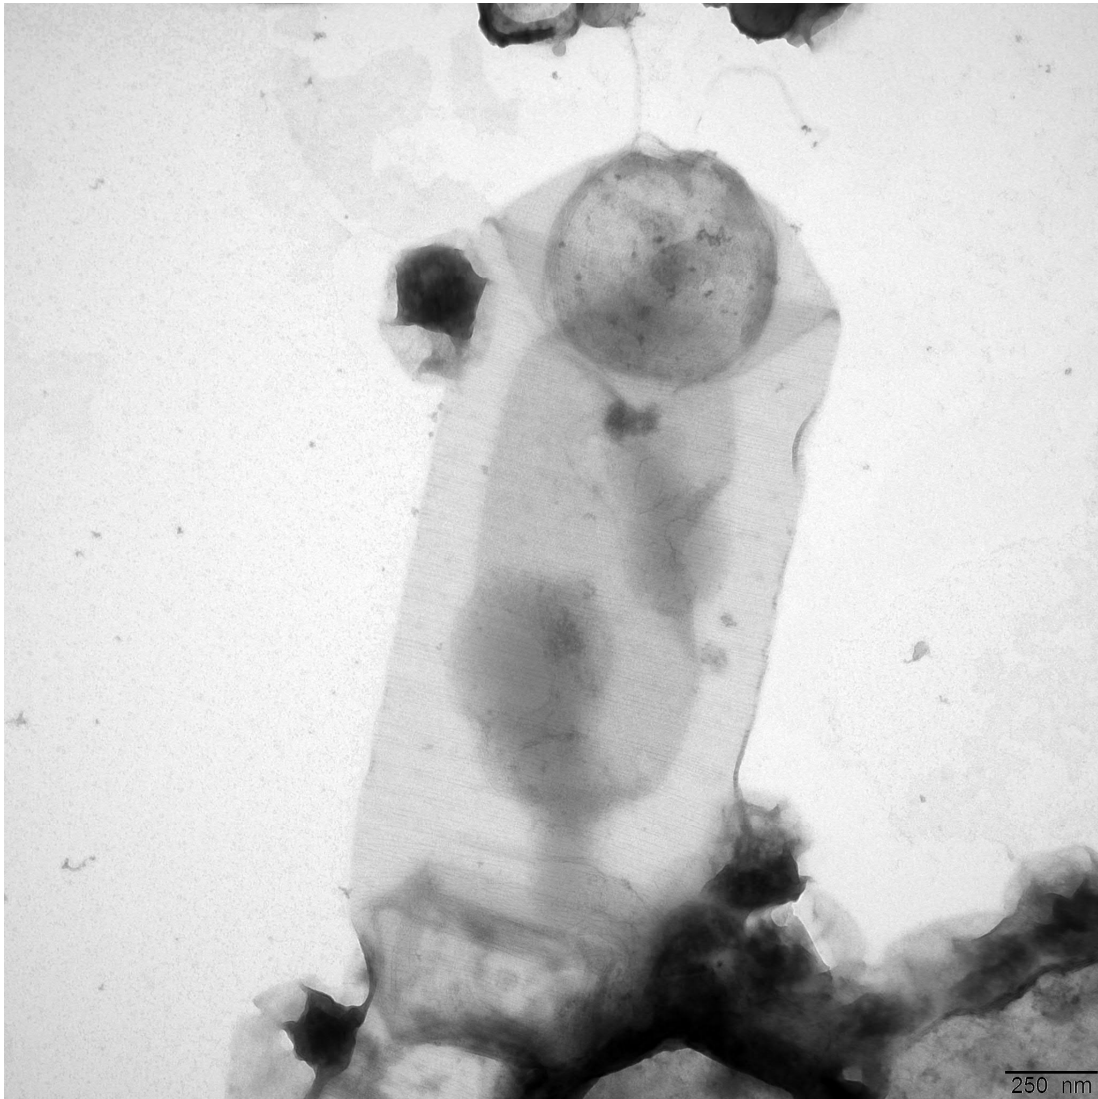

Fig S1 The fine structure of a sheath in a transmission electron micrograph (see Fig 1 for overview image). In this part of a resuspended cell pellet of the methanogenic limonene enrichment culture, we assigned the sheath to *Methanosaeta*, based on the spacer disc at the end of the filament and the presence and structure of the sheath. The cells inside the sheath may have been shrunk during the TEM preparation. The small black cells with a grey cape were assigned to the ultramicrobacterium OP3 LiM. Bar corresponds to 250 nm.

A

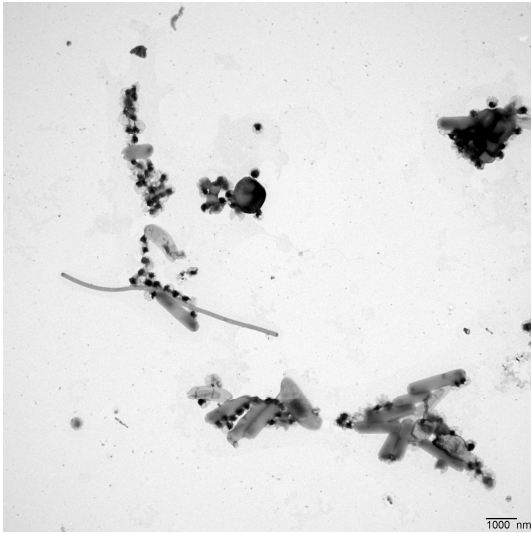

B

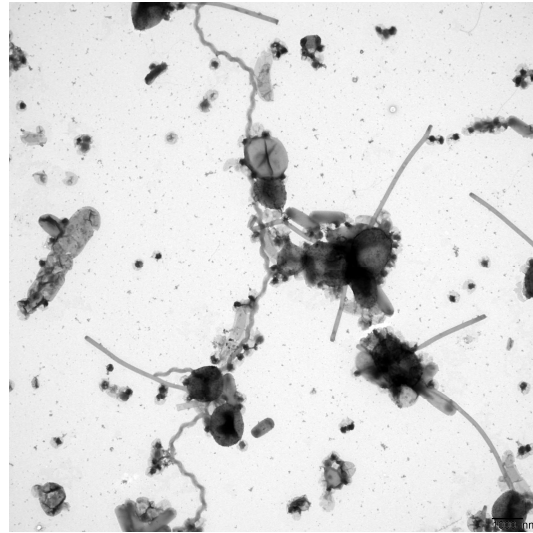

C

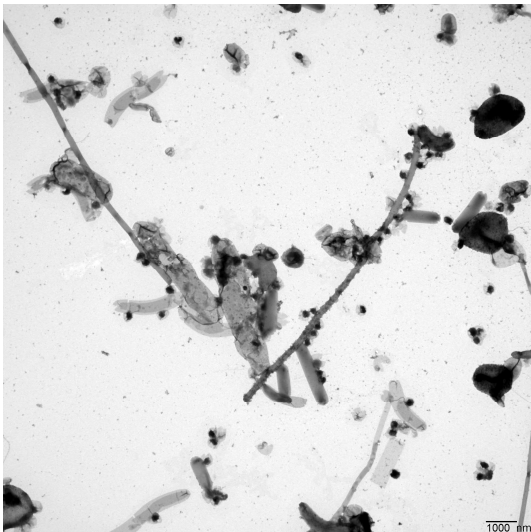

D

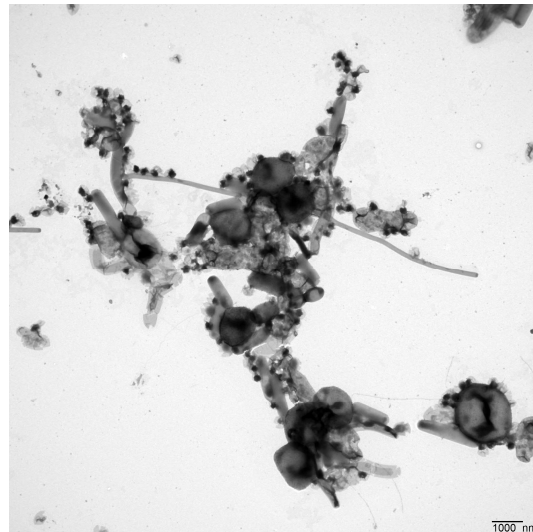

Fig S2 Morphological diversity in the methanogenic limonene enrichment culture as seen in transmission electron micrographs of a resuspended cell pellet. The cells may have been shrunk by the TEM preparation. The small black cells with a grey cape were assigned to the ultramicrobacterium OP3 LiM. Bar corresponds to 1  $\mu\text{m}$ .

A

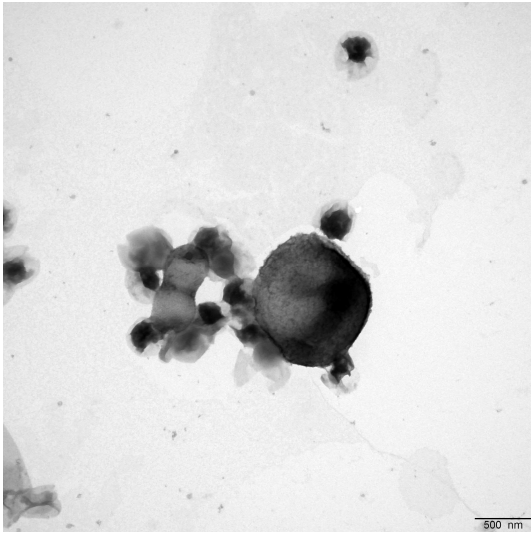

B

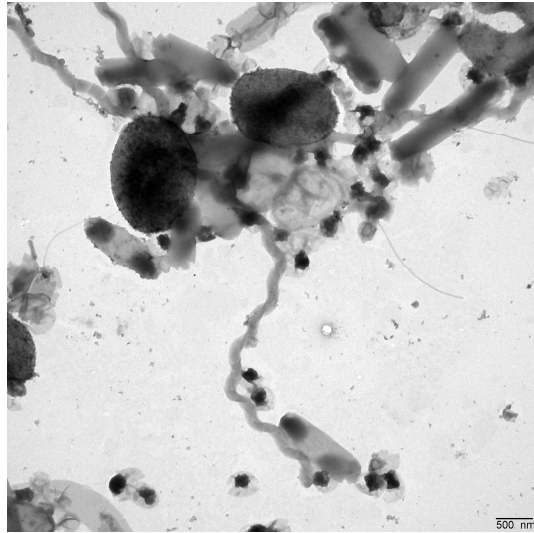

C

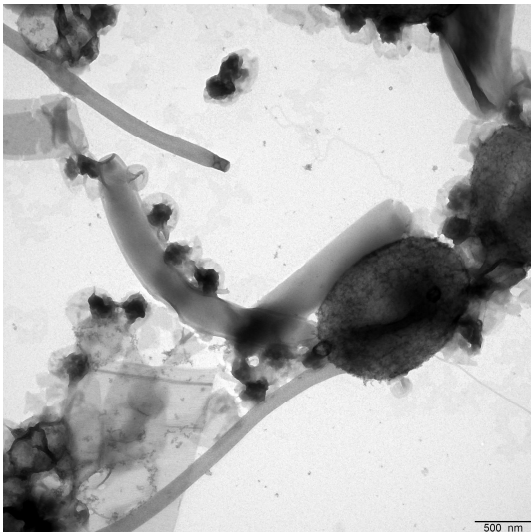

D

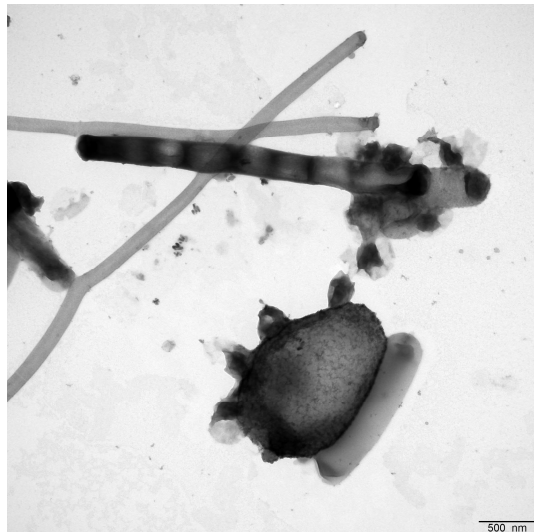

Fig S3 Morphological diversity in the methanogenic limonene enrichment culture as seen in transmission electron micrographs of a resuspended cell pellet. The cells may have been shrunk by the TEM preparation. The small black cells with a grey cape were assigned to the ultramicrobacterium OP3 LiM. Bar corresponds to 500 nm.

**A**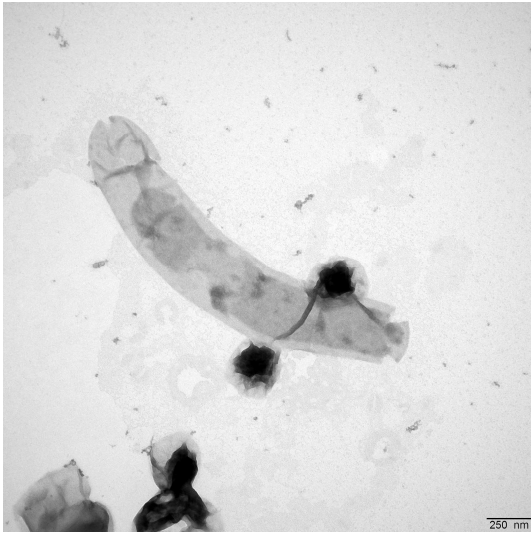**B**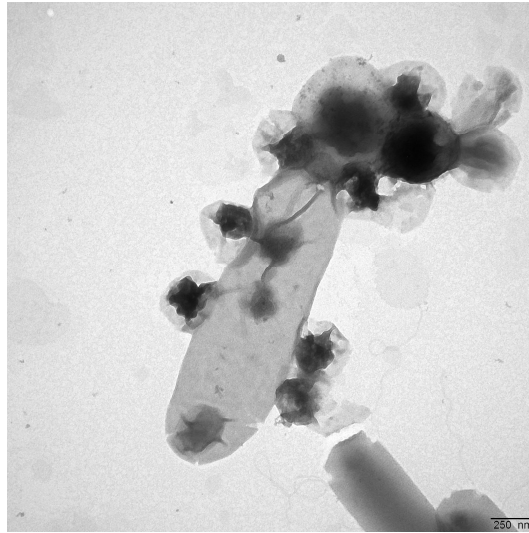**C**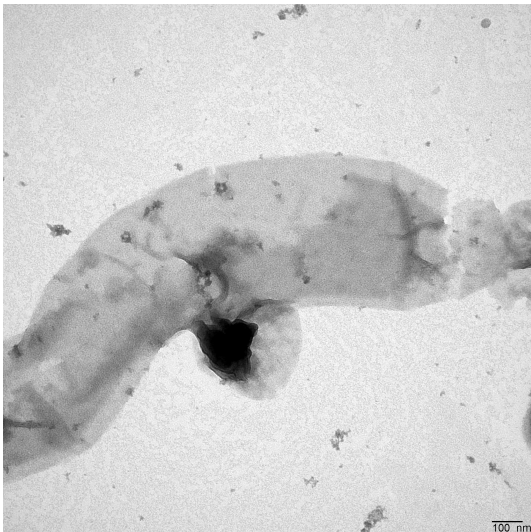**D**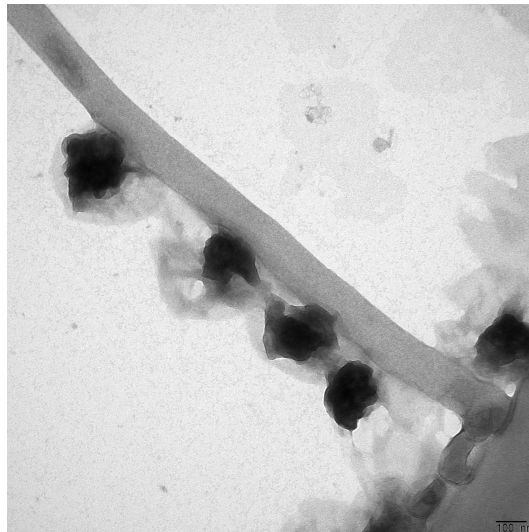

Fig S4 Morphological diversity in the methanogenic limonene enrichment culture as seen in transmission electron micrographs of a resuspended cell pellet. The cells may have been shrunk by the TEM preparation. The small black cells with a grey cape were assigned to the ultramicrobacterium OP3 LiM. Bar corresponds to 250 (A and B) and 100 nm (C and D).

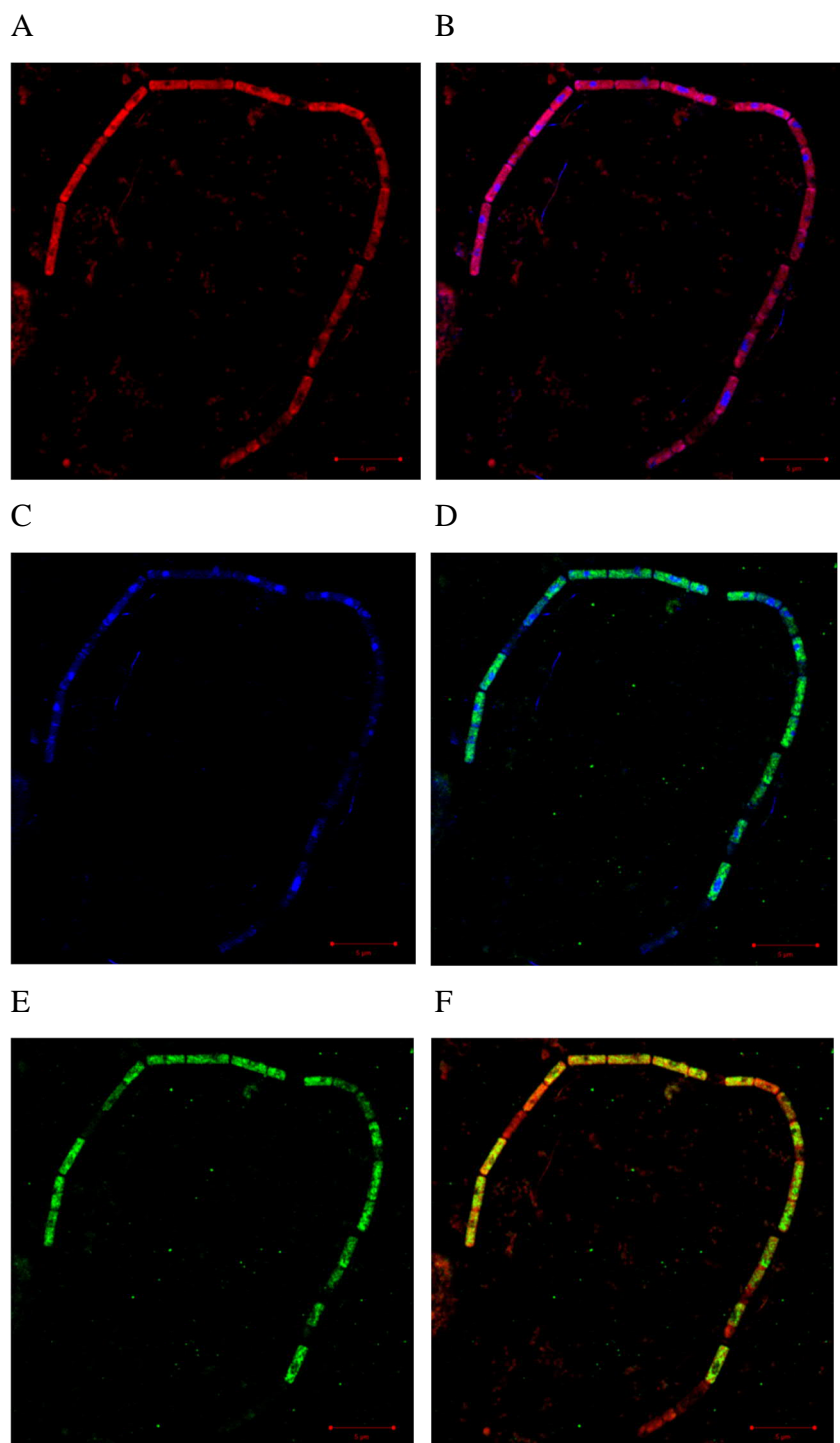

Fig S5 Structured illumination microscopy images of a filament assigned to *Methanosaeta*. Staining was achieved using Nile Red (red) for lipids (A, B, F), probe Arch915 labelled with four 6-carboxyfluorescein molecules (green) for rRNA (D, E, F), DAPI (blue) for DNA B, C, D). Bar corresponds to 5  $\mu\text{m}$ . See Fig 3 for DIC image.

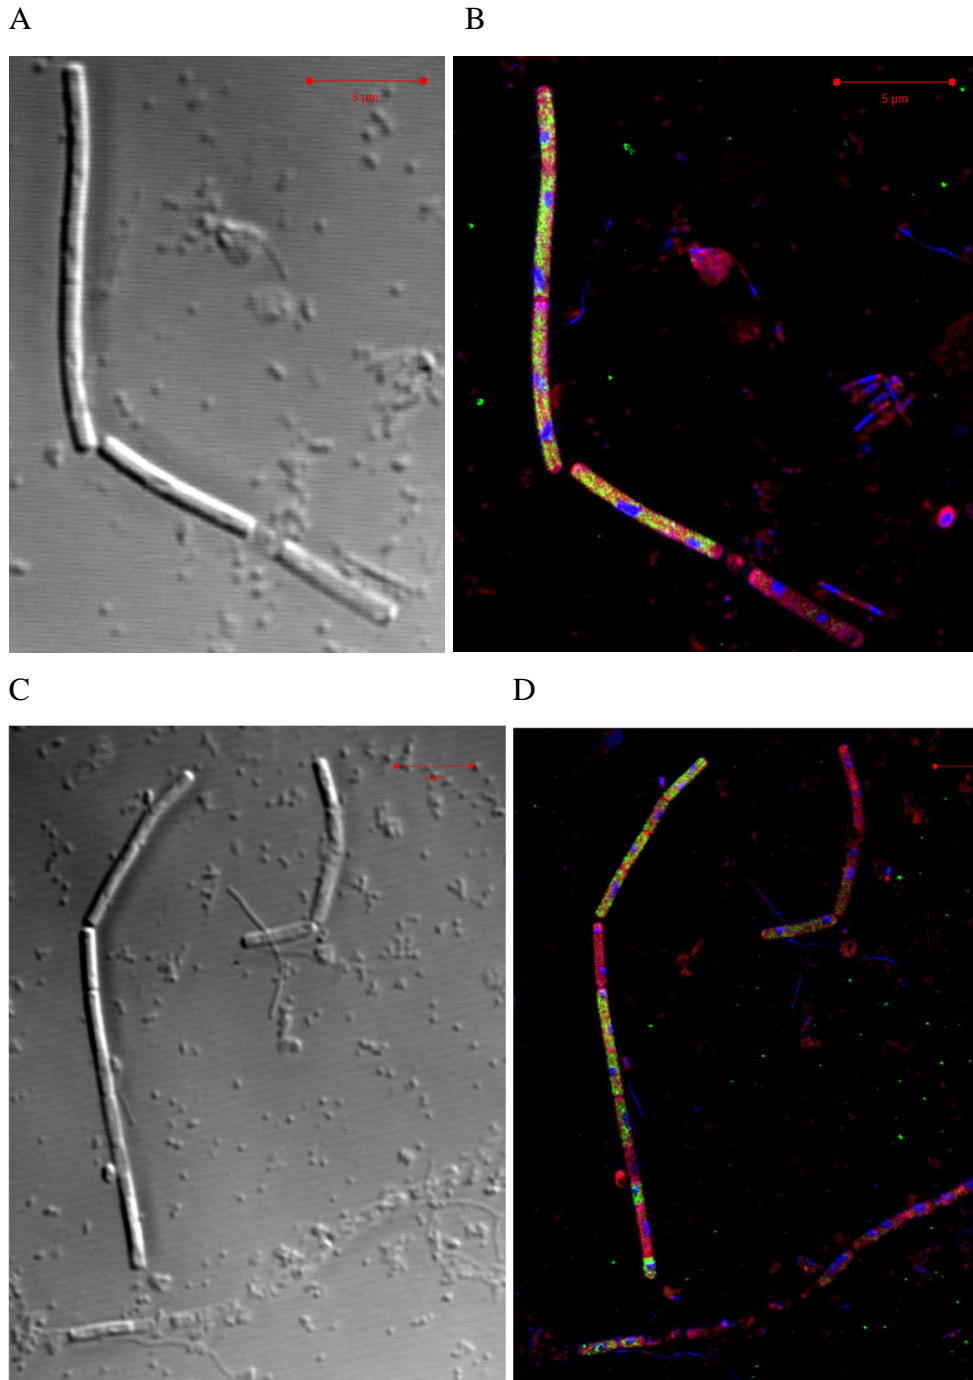

Fig S6 DIC (A, C) and SR-SIM images (B, D) of the limonene enrichment culture. Staining was achieved using Nile Red (red) for lipids, probe Arch915 labelled with four 6-carboxyfluorescein molecules (green) for rRNA, DAPI (blue) for DNA. Bar corresponds to 5 µm.

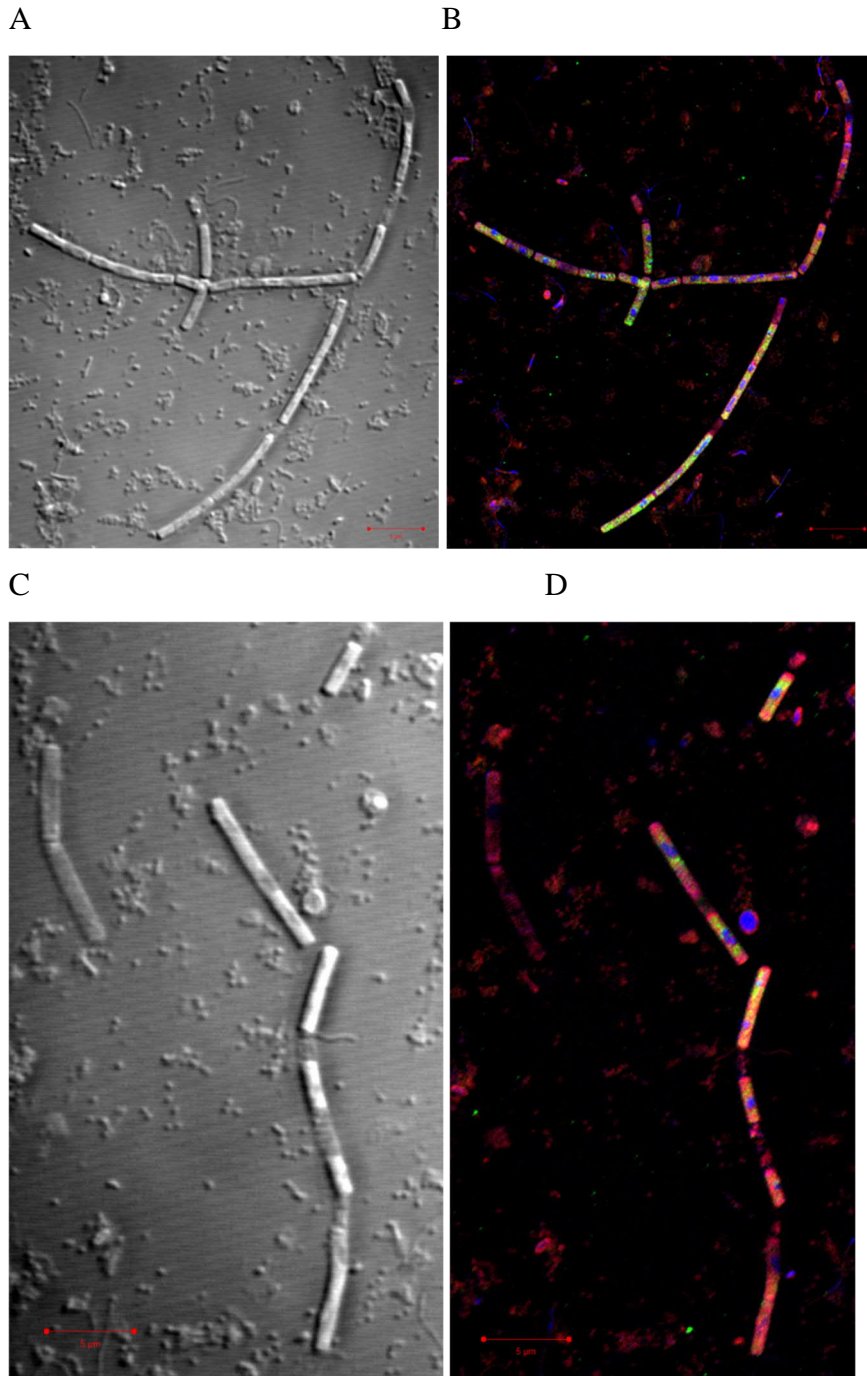

Fig S7 DIC and SR-SIM images (A, C and B, D, respectively) of the limonene enrichment culture. Staining was achieved using Nile Red (red) for lipids, probe Arch915 labelled with four 6-carboxyfluorescein molecules (green) for rRNA, DAPI (blue) for DNA. Bar corresponds to 5 µm.



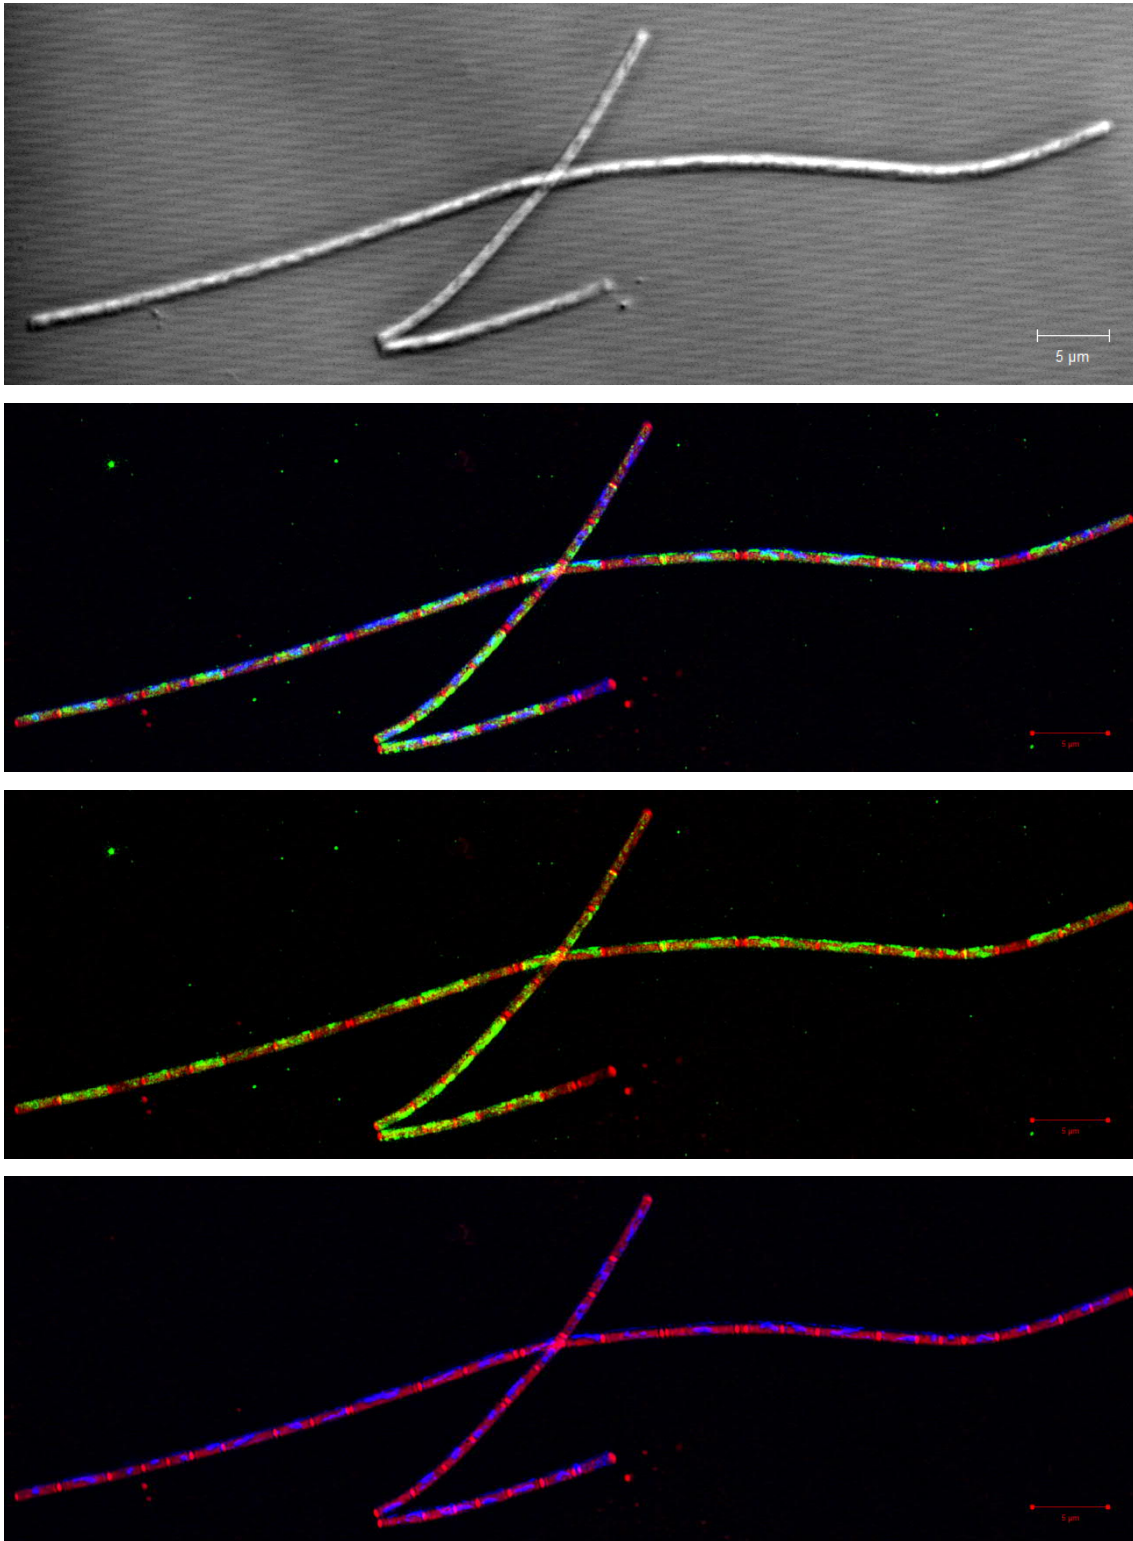

Fig S8 DIC and SR-SIM overlay images of a stationary culture of *Methanosaeta concilii* GP6<sup>T</sup> (DSM3671). Staining was achieved using Nile Red (red) for lipids, probe Arch915 labelled with four 6-carboxyfluorescein molecules (green) for rRNA, DAPI (blue) for DNA. Bar corresponds to 5 μm. Overstaining by Nile Red resulted in the

visibility of spacer plug-like structures. Pairs of these structures were annotated as future filament lysis locations, with a DNA-depleted microcell between them resulting from unequal cell division.

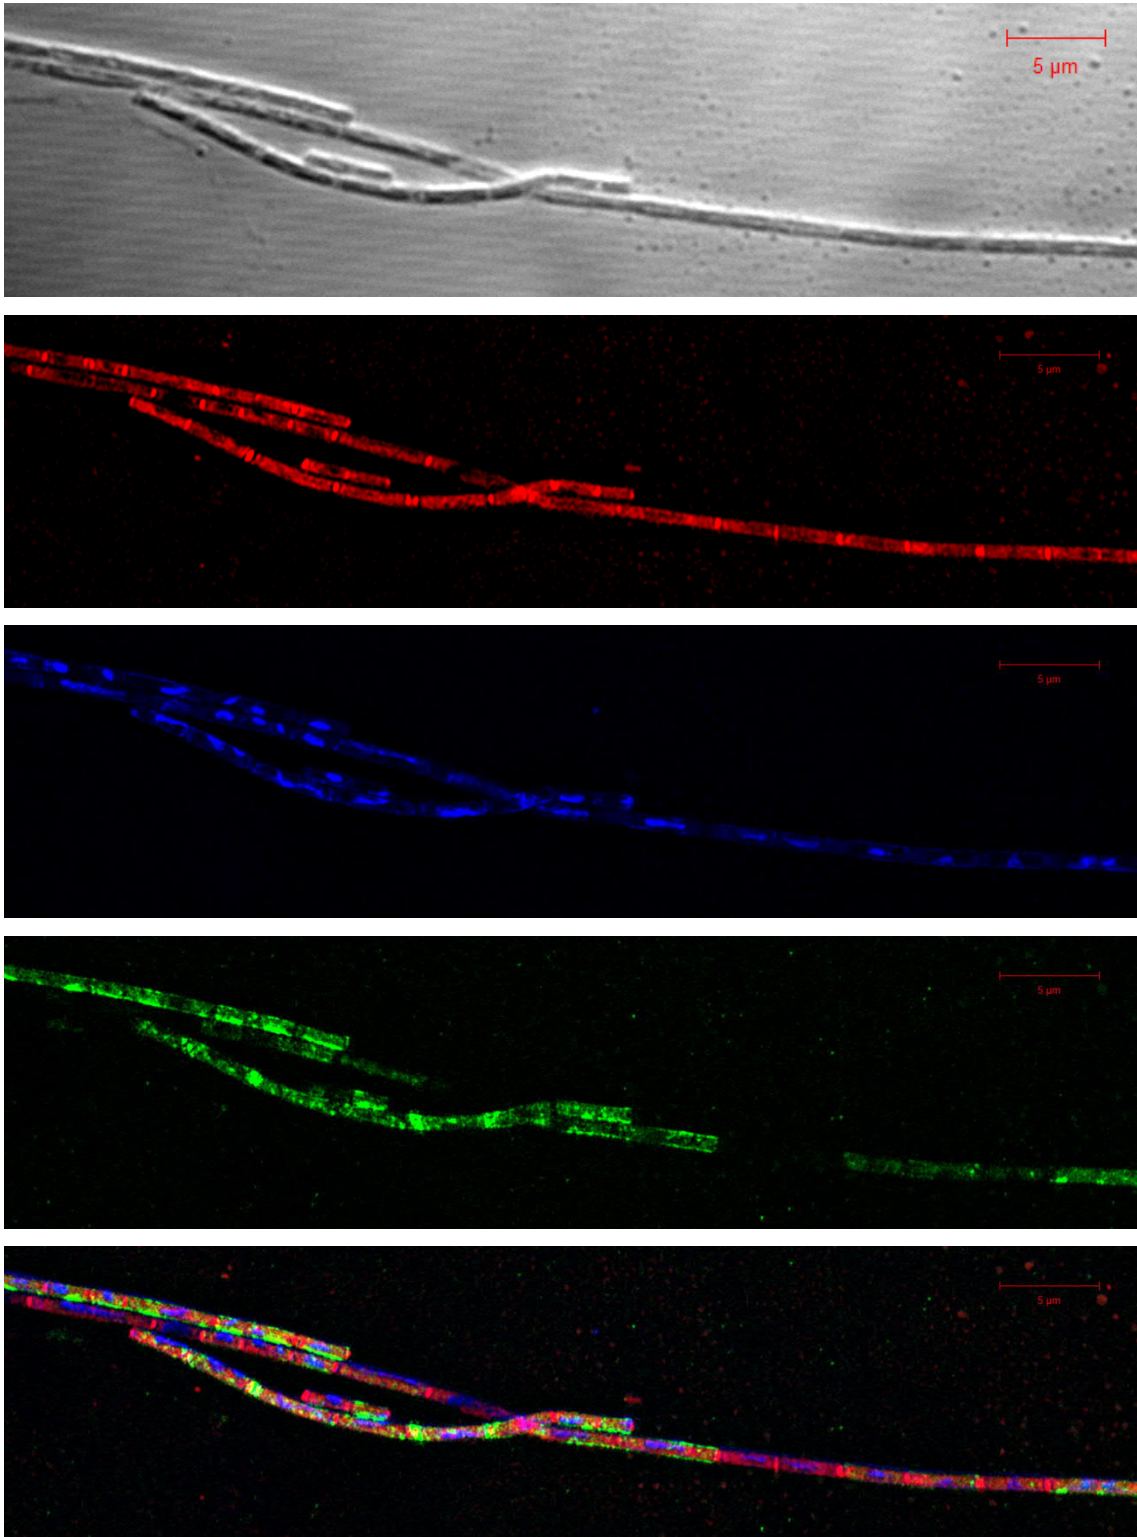

Fig S9 DIC and SR-SIM overlay images of a stationary culture of *Methanosaeta concilii* GP6<sup>T</sup> (DSM3671). Staining was achieved using Nile Red (red) for lipids, probe Arch915 labelled with four 6-carboxyfluorescein molecules (green) for rRNA, DAPI

(blue) for DNA. Bar corresponds to 5  $\mu\text{m}$ . Nile Red overstaining made spacer plug-like structures visible.

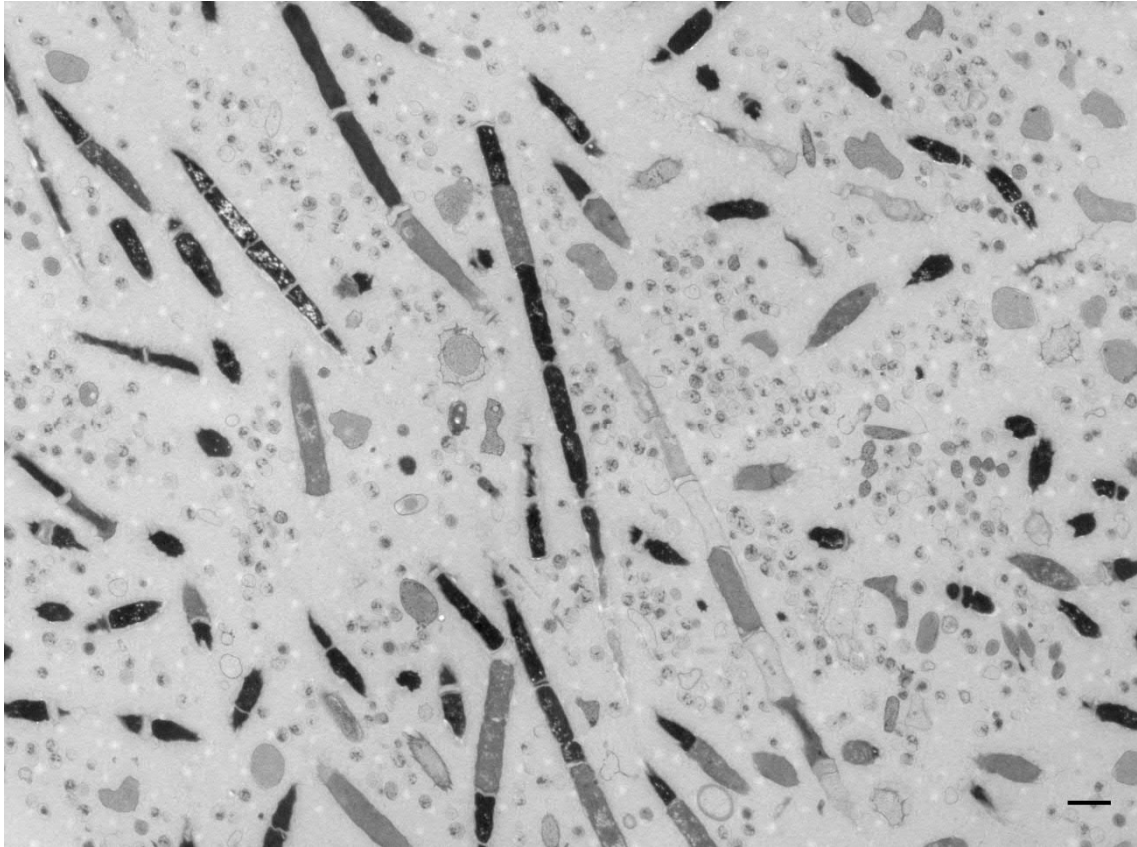

Fig S10 Thin section TEM image of methanogenic limonene enrichment culture. We assigned the longitudinal sectioned filaments to *Methanosaeta*. The intensity of the cell stain was expected to correlate with the availability of acidic groups inside the cell. *Methanosaeta* cells stained differently. The interpretation is not clear. Either healthy cells stain black, including that a grey stain or the absence of a stain represents sick or dead cell within the filament, or the staining of healthy cells was hampered by the cellular structures, including that black or unstained cells represent sick and dead cells. A subpopulation of *Methanosaeta* cells contained unstained structures of unknown origin which were present in grey and in black cells. Bar corresponds to 1  $\mu\text{m}$ .

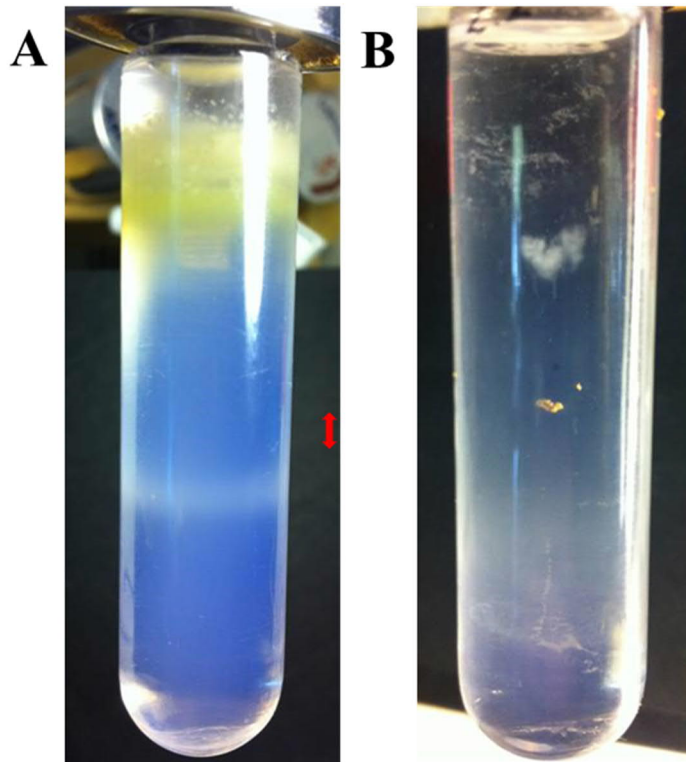

Fig S11 First (A) and second (B) Percoll gradient after cell separation by centrifugation. (A) OP3 LiM cells were most enriched above the clearly visible bottom band (marked by red range). (B) showed a diffusive layer in which 80% of all cells were OP3 LiM cells according to CARD-FISH analysis.

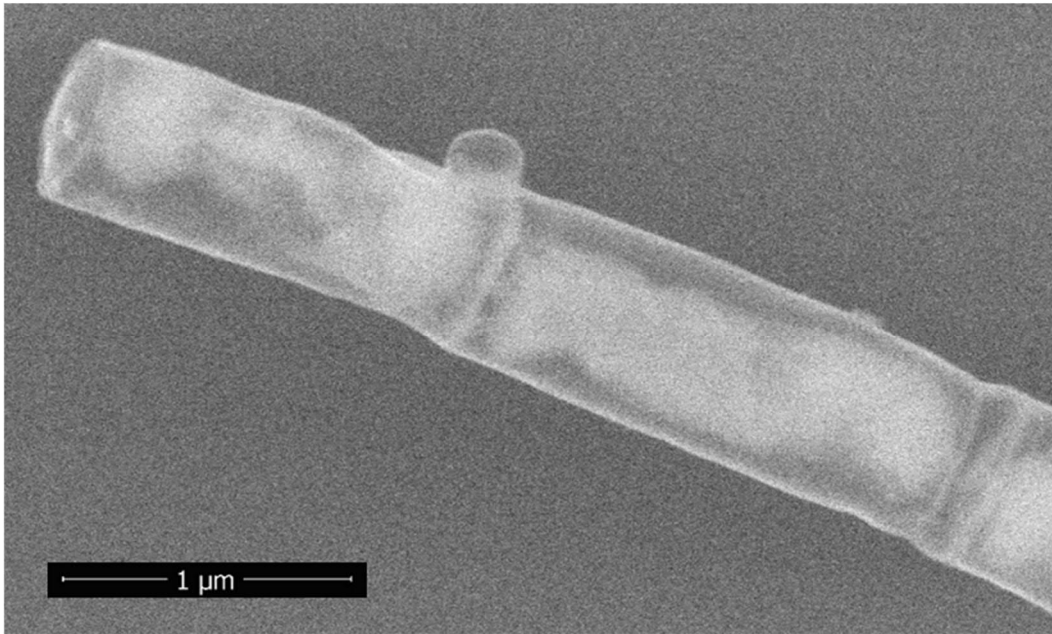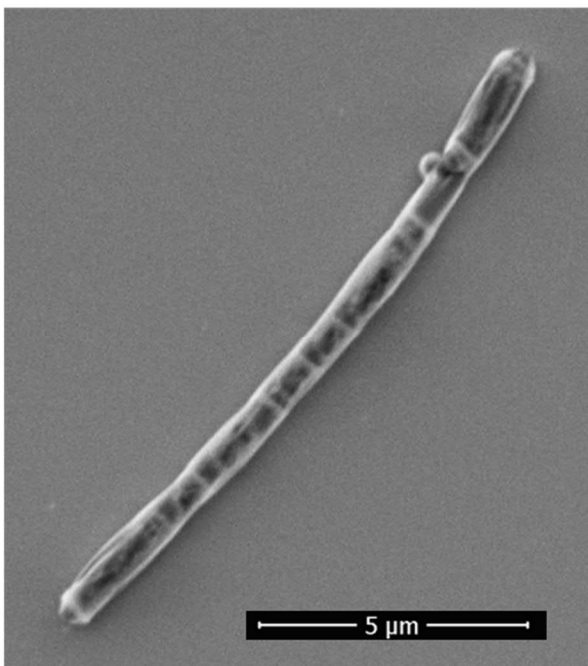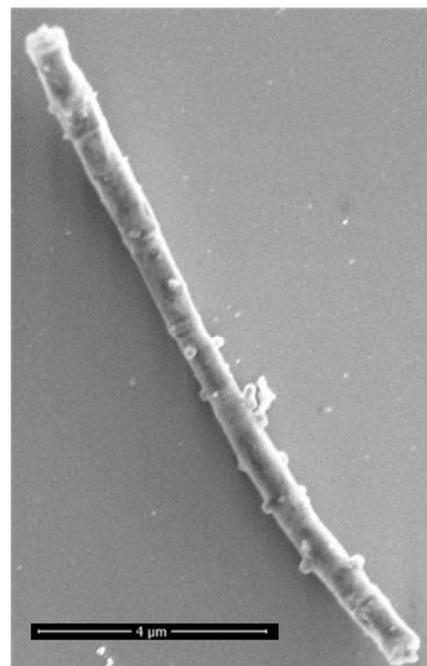

Fig S12 SEM micrographs of *Methanosaeta* filaments with attached ultramicrobial cells. Bar indicates 1, 5 and 4 μm, respectively.

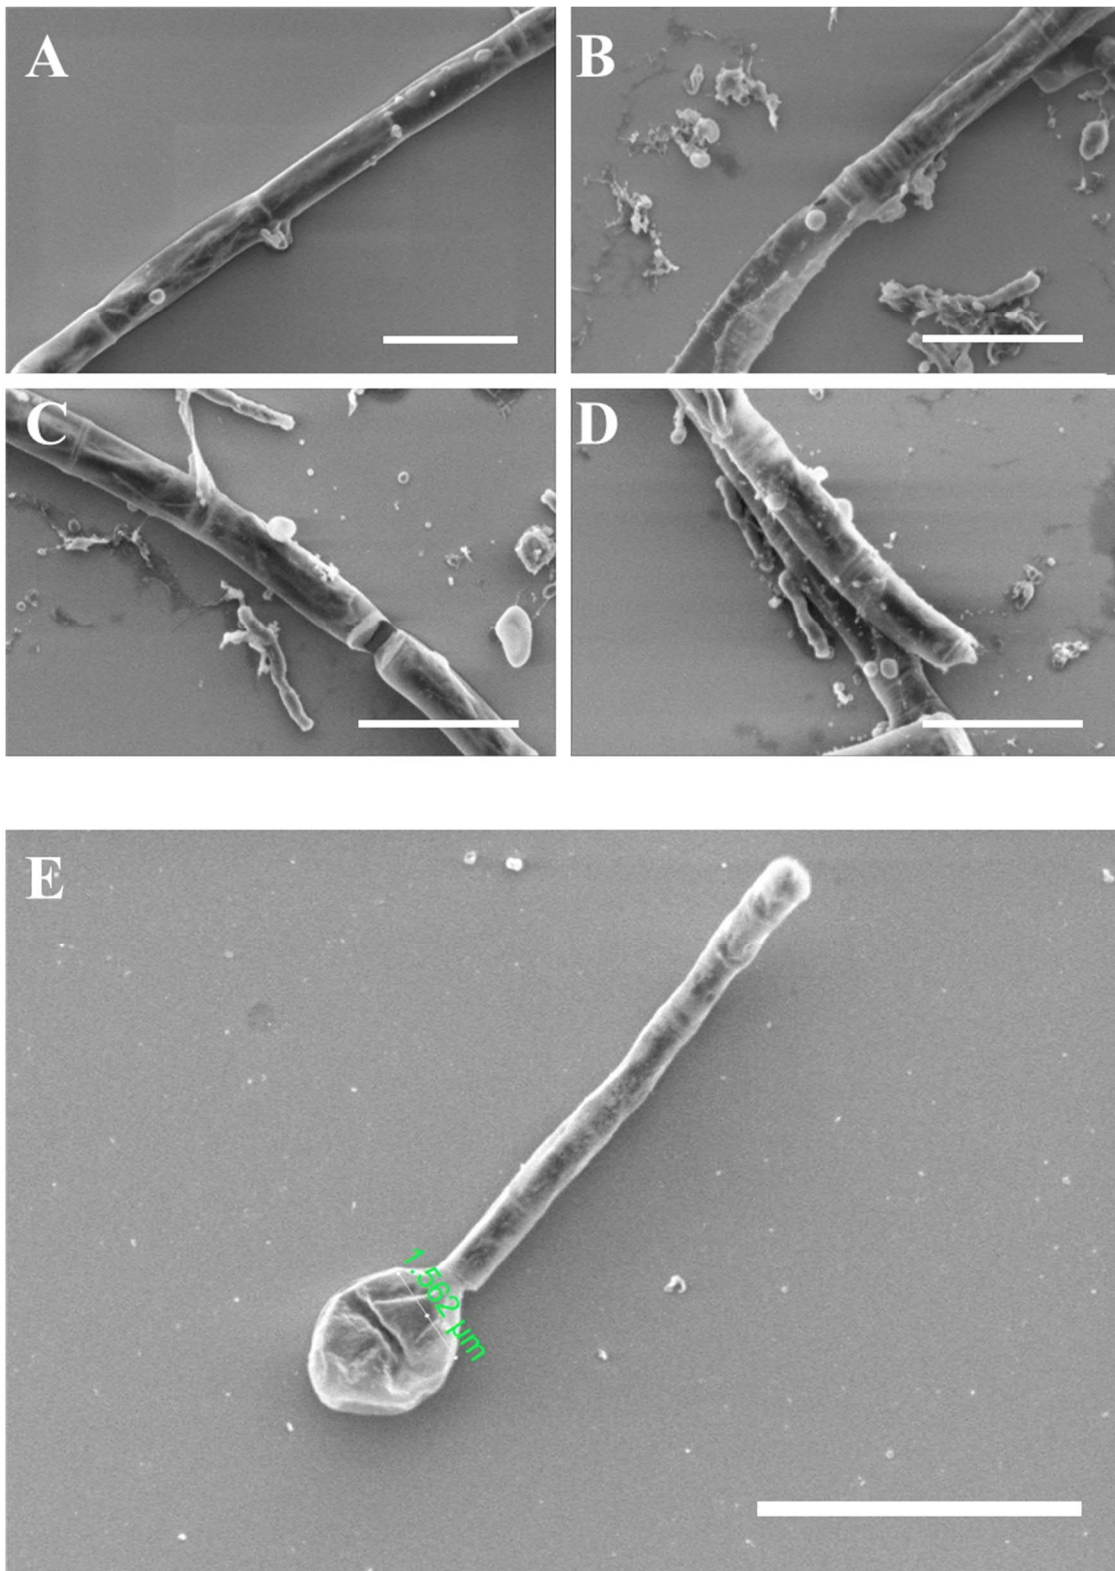

Fig S13 SEM micrographs of *Methanosaeta* and attached cells including a *Methanosaeta* filament with two visibly deformed cells. Scale bar: 2  $\mu\text{m}$  (A-D) and 5  $\mu\text{m}$  (E).

A



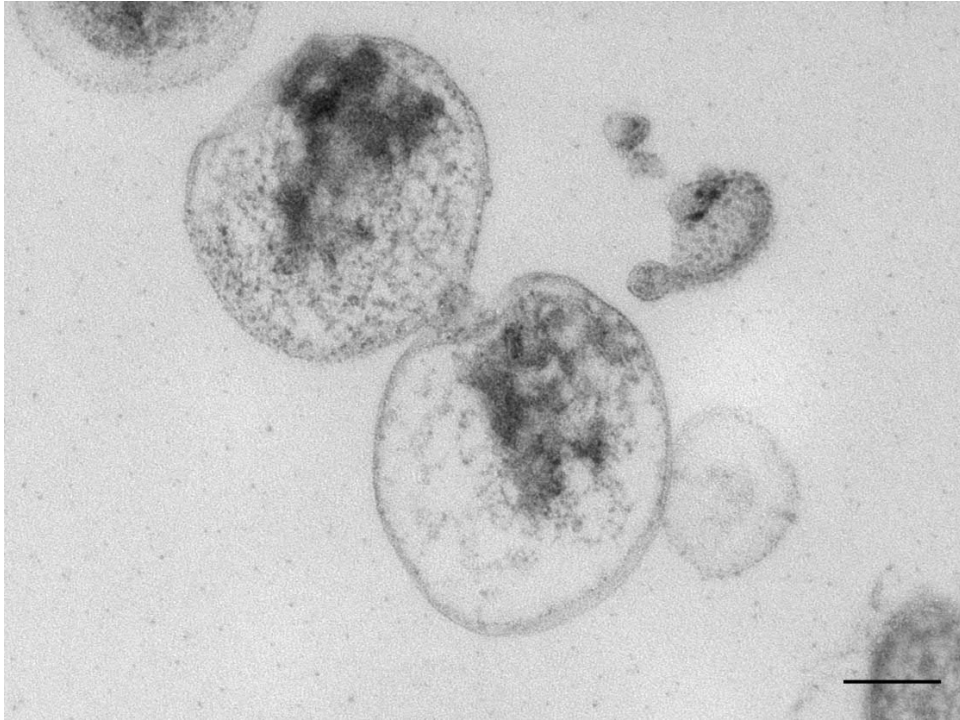

B

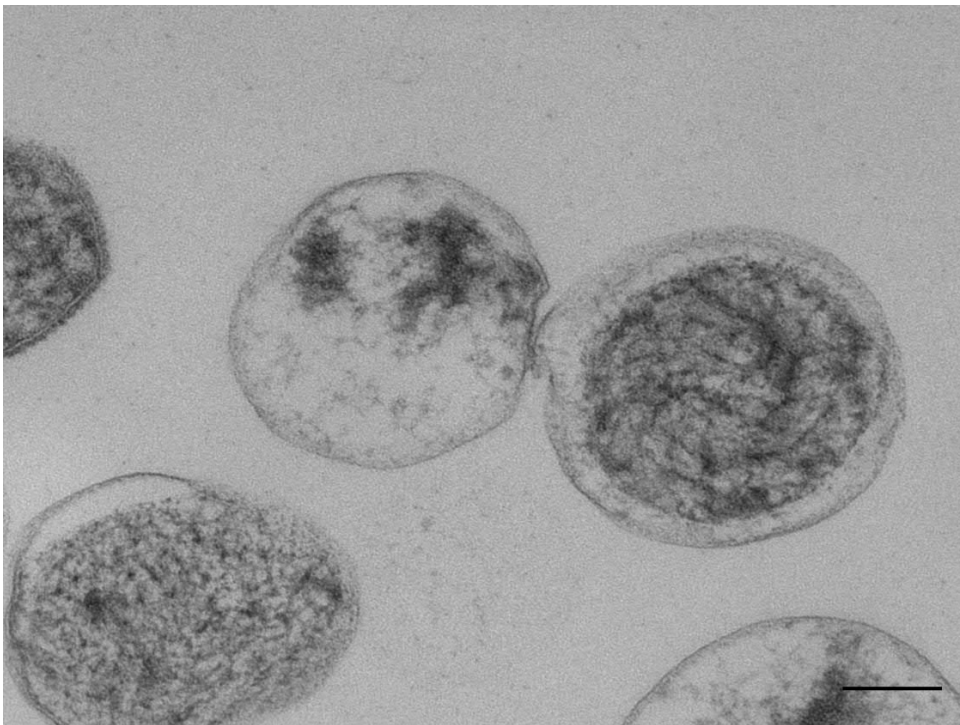

Fig S14 Thin section TEM images of the methanogenic limonene enrichment culture showing contacts between ultramicrobacteria. Bar corresponds to 200 nm.

A

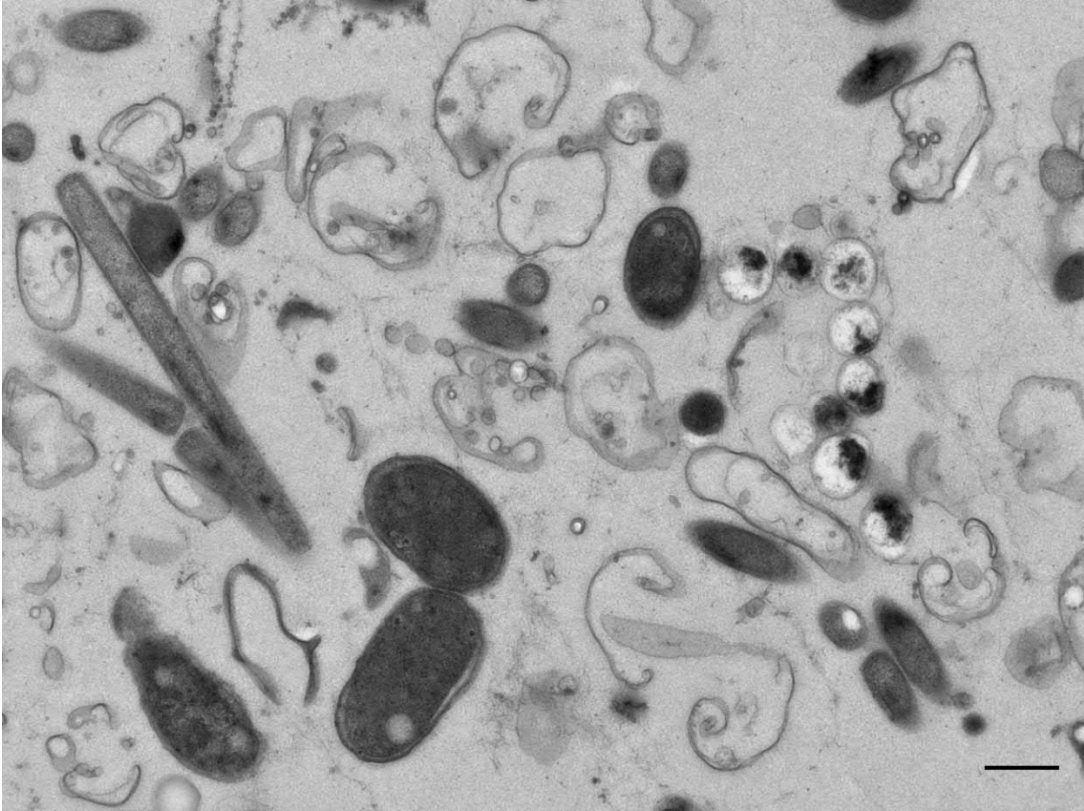

B

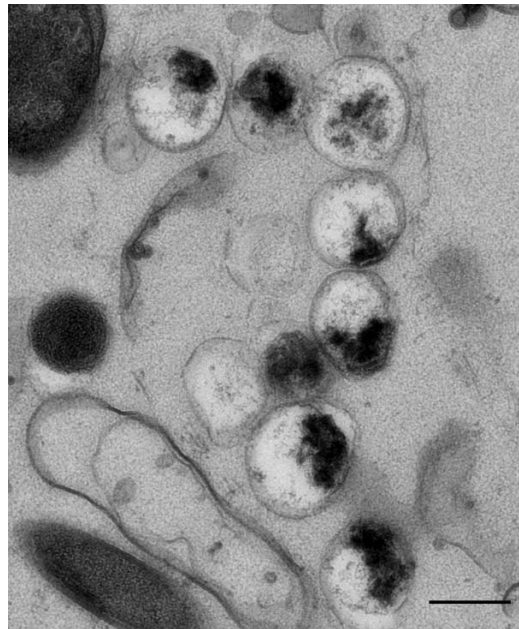

Fig S15 Aged enrichment cultures showed in thin section TEM images a large number of membrane remains of cells (A). The morphological type of ultramicrobacteria assigned to OP3 LiM cells was present as intact cells (A, enlarged in B). Bar corresponds to 500 nm (A) or 300 nm (B).

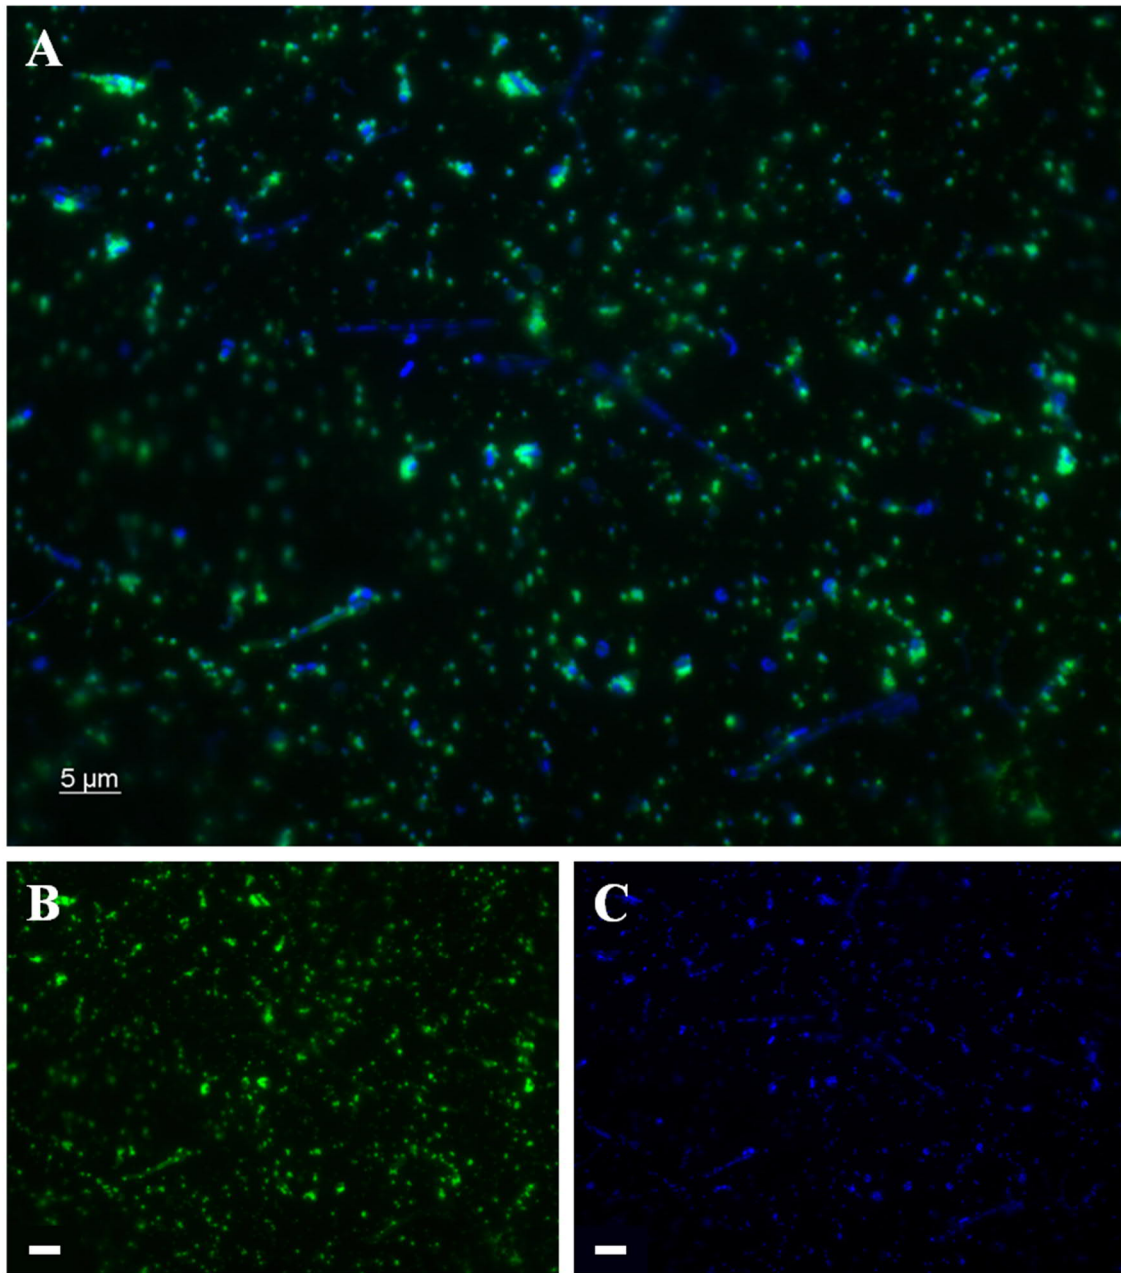

Fig S16 Detection of OP3 LiM cells by CARD-FISH. Cells were detected using the probe OP3-565 with helper oligonucleotides (green, A and B) and DAPI staining (blue, A and C). Scale bars, 5  $\mu\text{m}$ .

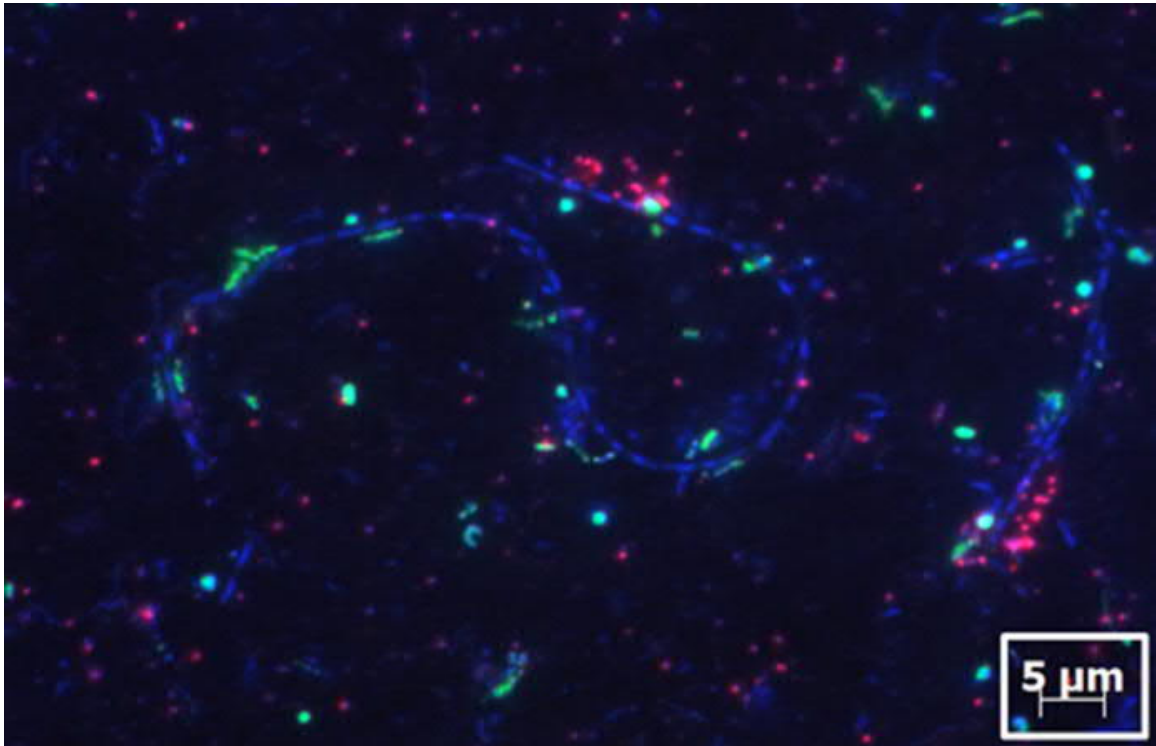

Fig S17 Detection of *Bacteria* in a methanogenic enrichment culture. DNA is stained with DAPI (blue), the 16S rRNA probe mix EUB338 I-III revealed bacterial cells without OP3 LiM (green) and the OP3 LiM-specific probe OP3-565 detected OP3 LiM cells (red) in CARD-FISH double hybridization experiments. Scale bar, 5  $\mu\text{m}$ .

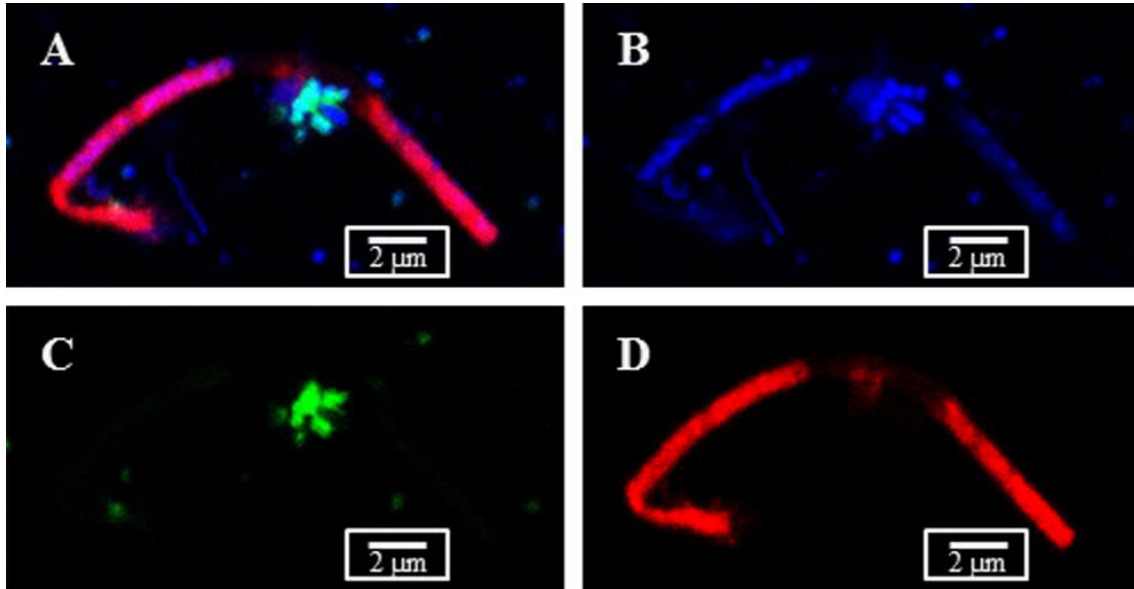

Fig S18 Detection of *Archaea* and OP3 LiM in a methanogenic enrichment culture in CLSM images. Overlay (A) and individual signals of DNA (B), OP3 LiM (C) and *Archaea* (D) were obtained by DAPI staining and double CARD-FISH with probes OP3-565 together with helper oligonucleotides and ARCH-915, respectively. Scale bar represents 2  $\mu\text{m}$ .

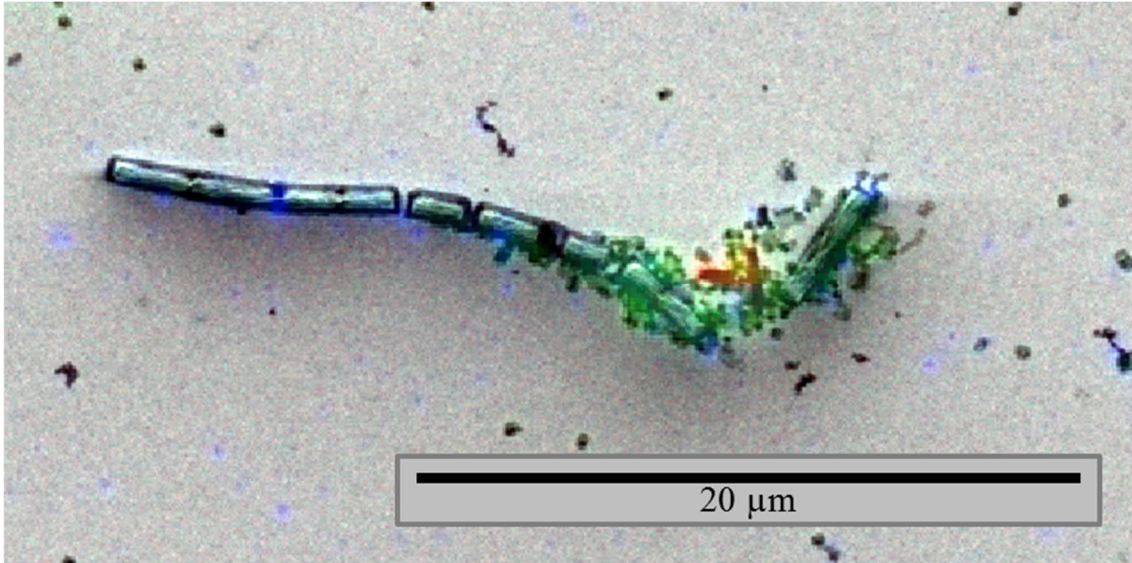

Fig. S19 Correlative fluorescence and electron microscopy image of the detection of OP3 LiM and *Archaea*. A Quanta FEG 250 equipped with the DELMIC SECOM platform was used to visualize a double CARD-FISH sample of the limonene methanogenic enrichment culture. OP3 LiM rRNA was detected with OP3-595 (red, Alexa-594 as label on the tyramide). Archaeal cells were detected with ARCH915 (green; Alexa-488). DNA was stained by DAPI (blue).

Formaldehyde-fixed cells (1.3% v/v for 1 h at RT) of the limonene methanogenic enrichment cultures were centrifuged at 13,000 rpm for 10 min. The pellet was washed twice in 500 μl 1 x PBS, twice in 200 μl MilliQ water and resuspended in 300 μl MilliQ water. The suspension was diluted with MilliQ water and 80 μl were placed on an indium oxide coated cover glass (DELMIC B.V., JA Delft, The Netherlands). After air drying CARD-FISH was performed.

**Supplement table 1: Absolute detection level of individual proteins (total spectral counts (TSC)) of OP3 LiM in size-fractions of the microbial community. Two biological replicates were analysed. SD standard deviation. The mass spectrometry proteomics data are available via the PRIDE partner repository with the dataset identifier PXD025008 and 10.6019/PXD025008.**

| Protein annotation                                                                  | NCBI locus_tag | Molecular Weight [kDa] | TSC (10kS-aggregates) | SD of TSC (10kS-aggregates) | TSC (100S-aggregates) | SD of TSC (100S-aggregates) | TSC (100S-cells) | SD of TSC (100S-cells) |
|-------------------------------------------------------------------------------------|----------------|------------------------|-----------------------|-----------------------------|-----------------------|-----------------------------|------------------|------------------------|
| 18-strand beta-barrel outer membrane pore                                           | BU251_04490    | 53                     | 2718                  | 384                         | 1076                  | 247                         | 2133             | 443                    |
| co-chaperone GroES                                                                  | BU251_04735    | 58                     | 1019                  | 151                         | 546                   | 14                          | 1226             | 50                     |
| GPI-membrane anchored actin binding protein with KELCH repeats                      | BU251_08370    | 499                    | 1132                  | 448                         | 503                   | 286                         | 940              | 197                    |
| translation elongation factor Tu                                                    | BU251_03080    | 44                     | 760                   | 6                           | 543                   | 34                          | 961              | 24                     |
| pyruvate phosphate dikinase                                                         | BU251_04585    | 101                    | 723                   | 192                         | 410                   | 29                          | 883              | 117                    |
| DNA-directed RNA polymerase subunit beta                                            | BU251_03055    | 128                    | 640                   | 175                         | 427                   | 18                          | 722              | 57                     |
| DNA-directed RNA polymerase subunit beta'                                           | BU251_03060    | 152                    | 507                   | 212                         | 401                   | 11                          | 638              | 9                      |
| hypothetical protein                                                                | BU251_02745    | 326                    | 465                   | 187                         | 156                   | 136                         | 466              | 82                     |
| polyribonucleotide nucleotidyltransferase                                           | BU251_05955    | 77                     | 396                   | 16                          | 210                   | 14                          | 406              | 11                     |
| peptidyl-prolyl cis-trans isomerase                                                 | BU251_00050    | 35                     | 339                   | 14                          | 200                   | 25                          | 356              | 75                     |
| Clp protease, ATP-binding subunit                                                   | BU251_06185    | 91                     | 352                   | 37                          | 161                   | 12                          | 361              | 6                      |
| very large multi-enzyme surface protein                                             | BU251_00165    | 4382                   | 647                   | 132                         | 100                   | 40                          | 127              | 9                      |
| ATPase for pilus assembly/DNA-transfer CpaF                                         | BU251_00065    | 82                     | 320                   | 57                          | 174                   | 8                           | 358              | 11                     |
| flagellar motor protein MotD                                                        | BU251_01115    | 24                     | 322                   | 48                          | 126                   | 11                          | 328              | 54                     |
| glutamine synthetase type III                                                       | BU251_06845    | 83                     | 312                   | 93                          | 144                   | 14                          | 315              | 4                      |
| transmembrane receptor with multiple PAS sensor domains and histidine kinase domain | BU251_04855    | 170                    | 271                   | 81                          | 204                   | 8                           | 292              | 6                      |
| outer membrane protein assembly factor BamA                                         | BU251_00665    | 87                     | 344                   | 66                          | 142                   | 15                          | 262              | 11                     |
| carbamoyl phosphate synthase large subunit                                          | BU251_01710    | 118                    | 258                   | 118                         | 139                   | 1                           | 334              | 17                     |
| phosphoglycerate dehydrogenase                                                      | BU251_01095    | 57                     | 283                   | 48                          | 145                   | 7                           | 299              | 19                     |
| glyceraldehyde-3-phosphate dehydrogenase                                            | BU251_04240    | 36                     | 256                   | 10                          | 170                   | 16                          | 298              | 70                     |

|                                                                                            |             |     |     |    |     |    |     |    |
|--------------------------------------------------------------------------------------------|-------------|-----|-----|----|-----|----|-----|----|
| transcription termination factor Rho                                                       | BU251_01315 | 47  | 258 | 8  | 154 | 6  | 289 | 37 |
| expressed DUF4139 protein, secreted                                                        | BU251_00900 | 63  | 329 | 71 | 87  | 17 | 229 | 11 |
| porA                                                                                       | BU251_00535 | 43  | 220 | 41 | 128 | 16 | 291 | 27 |
| chromosome segregation protein SMC, archaeal type                                          | BU251_00240 | 45  | 254 | 15 | 133 | 17 | 246 | 25 |
| bifunctional preprotein translocase subunit SecD/SecF                                      | BU251_05045 | 80  | 230 | 74 | 146 | 42 | 235 | 11 |
| molecular chaperone DnaK                                                                   | BU251_02930 | 68  | 225 | 34 | 116 | 16 | 261 | 16 |
| hypothetical protein                                                                       | BU251_00210 | 43  | 128 | 11 | 155 | 8  | 310 | 4  |
| DNA-directed RNA polymerase subunit alpha                                                  | BU251_03225 | 37  | 214 | 33 | 108 | 6  | 255 | 24 |
| putative exosortase-affiliated protein                                                     | BU251_00715 | 13  | 241 | 21 | 79  | 1  | 251 | 61 |
| chromosome segregation protein SMC, common bacterial type                                  | BU251_04010 | 124 | 181 | 64 | 114 | 24 | 227 | 11 |
| multidrug efflux pump subunit AcrB                                                         | BU251_07465 | 116 | 172 | 57 | 141 | 23 | 198 | 15 |
| pyruvate:ferredoxin oxidoreductase, gamma subunit                                          | BU251_00525 | 20  | 177 | 18 | 109 | 30 | 224 | 10 |
| actin-like protein MreB                                                                    | BU251_05665 | 39  | 197 | 15 | 91  | 6  | 218 | 34 |
| expressed membrane protein                                                                 | BU251_07630 | 28  | 217 | 3  | 88  | 8  | 181 | 10 |
| phosphoribosylpyrophosphate synthetase                                                     | BU251_00625 | 35  | 187 | 31 | 89  | 18 | 199 | 43 |
| translation initiation factor IF-2                                                         | BU251_01185 | 79  | 177 | 59 | 79  | 35 | 215 | 47 |
| translation elongation factor EF-G, a GTPase                                               | BU251_08040 | 71  | 172 | 46 | 93  | 16 | 204 | 22 |
| ketol-acid reductoisomerase                                                                | BU251_00930 | 36  | 174 | 23 | 88  | 1  | 204 | 16 |
| fructose-bisphosphate aldolase class-II                                                    | BU251_00910 | 49  | 170 | 38 | 85  | 9  | 204 | 52 |
| DNA topoisomerase type II (gyrase) subunit B                                               | BU251_00020 | 91  | 150 | 45 | 99  | 16 | 205 | 32 |
| GMP synthase (glutamine amidotransferase II)                                               | BU251_04725 | 62  | 156 | 76 | 89  | 31 | 205 | 27 |
| glutamate dehydrogenase                                                                    | BU251_01730 | 49  | 173 | 11 | 94  | 12 | 179 | 19 |
| S-adenosylmethionine synthetase                                                            | BU251_00890 | 42  | 170 | 27 | 88  | 4  | 186 | 13 |
| dihydroxy-acid dehydratase                                                                 | BU251_00915 | 59  | 202 | 77 | 63  | 1  | 179 | 26 |
| phosphoglycerate kinase                                                                    | BU251_04065 | 43  | 159 | 11 | 69  | 1  | 192 | 4  |
| periplasmic-binding component of ABC transport system specific for sn-glycerol-3-phosphate | BU251_00190 | 51  | 161 | 0  | 82  | 6  | 177 | 13 |



|                                                                             |             |     |     |    |     |    |     |    |
|-----------------------------------------------------------------------------|-------------|-----|-----|----|-----|----|-----|----|
| gliding motility-associated ABC transporter substrate-binding protein GldG  | BU251_08675 | 94  | 156 | 40 | 98  | 11 | 165 | 7  |
| class V aminotransferase                                                    | BU251_01090 | 41  | 152 | 40 | 89  | 16 | 175 | 25 |
| proton-translocating pyrophosphatase                                        | BU251_00290 | 72  | 152 | 35 | 105 | 18 | 155 | 11 |
| hypothetical protein                                                        | BU251_01495 | 124 | 145 | 65 | 90  | 16 | 170 | 41 |
| carB                                                                        | BU251_08275 | 120 | 148 | 39 | 78  | 6  | 170 | 10 |
| secretion system protein with secretin and TonB domains                     | BU251_00060 | 58  | 177 | 30 | 62  | 2  | 156 | 8  |
| bacterioferritin                                                            | BU251_00560 | 18  | 172 | 32 | 61  | 11 | 161 | 35 |
| 30S ribosomal protein S2                                                    | BU251_00830 | 33  | 155 | 11 | 63  | 1  | 175 | 14 |
| DNA gyrase subunit A                                                        | BU251_00030 | 91  | 145 | 49 | 75  | 16 | 165 | 3  |
| recombinase RecA                                                            | BU251_05105 | 39  | 143 | 1  | 64  | 15 | 175 | 11 |
| expressed membrane protein                                                  | BU251_00135 | 78  | 153 | 32 | 78  | 13 | 140 | 18 |
| secreted protein containing glycoside hydrolase family 2, TIM barrel domain | BU251_00205 | 94  | 169 | 46 | 42  | 18 | 158 | 8  |
| ATP-dependent Zn proteases FtsH                                             | BU251_04905 | 69  | 148 | 35 | 61  | 10 | 159 | 11 |
| PilT, pilus retraction ATPase                                               | BU251_03245 | 39  | 142 | 17 | 63  | 9  | 161 | 34 |
| type I site-specific deoxyribonuclease, HsdR family                         | BU251_02610 | 117 | 132 | 41 | 68  | 11 | 157 | 16 |
| alkaline phosphatase                                                        | BU251_06895 | 46  | 144 | 6  | 53  | 9  | 155 | 26 |
| secretion system ATPase related to VirB11/CpaF                              | BU251_06755 | 52  | 130 | 31 | 65  | 3  | 155 | 40 |
| short chain acyl-CoA dehydrogenase                                          | BU251_04025 | 42  | 159 | 4  | 55  | 4  | 136 | 7  |
| 3-deoxy-7-phosphoheptulonate synthase                                       | BU251_03910 | 37  | 140 | 27 | 70  | 7  | 137 | 13 |
| phosphodiesterase with HD domain of ribonucleaseY                           | BU251_09405 | 59  | 140 | 39 | 59  | 5  | 145 | 8  |
| LPS assembly outer membrane protein LptD                                    | BU251_02985 | 80  | 186 | 65 | 45  | 11 | 112 | 21 |
| phosphoenolpyruvate-protein kinase (PTS system EI component in bacteria)    | BU251_00880 | 65  | 144 | 45 | 46  | 6  | 148 | 1  |
| ATP-dependent protease/chaperone ClpB                                       | BU251_02910 | 97  | 129 | 54 | 58  | 1  | 151 | 1  |
| cellobiose phosphorylase                                                    | BU251_00185 | 93  | 134 | 68 | 63  | 20 | 138 | 19 |
| alanyl-tRNA synthetase                                                      | BU251_05095 | 96  | 114 | 44 | 65  | 10 | 152 | 12 |
| inosine 5-monophosphate dehydrogenase                                       | BU251_04730 | 41  | 128 | 9  | 63  | 5  | 139 | 21 |

|                                                                                                                                    |             |     |     |     |    |    |     |    |
|------------------------------------------------------------------------------------------------------------------------------------|-------------|-----|-----|-----|----|----|-----|----|
| type II secretory pathway ATPase GspE/PuIE or type IV pilus assembly pathway ATPase PilB                                           | BU251_05920 | 43  | 123 | 27  | 60 | 14 | 146 | 4  |
| protein with domain of unknown function (DUF4912)                                                                                  | BU251_01125 | 40  | 136 | 15  | 51 | 7  | 141 | 36 |
| 6-phosphofructokinase                                                                                                              | BU251_03785 | 37  | 134 | 1   | 55 | 2  | 138 | 8  |
| sensory signal transduction histidine kinase with PAS domain                                                                       | BU251_02305 | 114 | 123 | 74  | 61 | 13 | 140 | 23 |
| ribonuclease E or G                                                                                                                | BU251_05565 | 57  | 133 | 71  | 52 | 9  | 136 | 14 |
| transcription termination control protein NusA                                                                                     | BU251_01180 | 43  | 135 | 18  | 42 | 1  | 134 | 17 |
| S-adenosyl-L-homocysteine hydrolase                                                                                                | BU251_00895 | 46  | 102 | 20  | 53 | 4  | 150 | 11 |
| hypothetical protein                                                                                                               | BU251_02695 | 93  | 141 | 47  | 42 | 15 | 121 | 11 |
| GMP synthase [glutamine-hydrolyzing], ATP pyrophosphatase subunit B                                                                | BU251_01715 | 36  | 126 | 21  | 46 | 5  | 131 | 31 |
| isoleucine--tRNA synthetase                                                                                                        | BU251_05700 | 105 | 108 | 46  | 54 | 13 | 136 | 19 |
| ATP phosphoribosyltransferase                                                                                                      | BU251_00580 | 33  | 129 | 29  | 46 | 8  | 122 | 28 |
| signal transducer with PAS sensor, GGDEF (diguanylate cyclase) and metal dependent phosphohydrolase domains                        | BU251_01490 | 82  | 116 | 37  | 55 | 12 | 118 | 10 |
| pilin related to pseudopilin PulG                                                                                                  | BU251_05600 | 15  | 138 | 25  | 39 | 9  | 113 | 8  |
| bifunctional UDP-3-O-[3-hydroxymyristoyl] N-acetylglucosamine deacetylase/(3R)-hydroxymyristoyl-[acyl-carrier-protein] dehydratase | BU251_00680 | 48  | 111 | 10  | 57 | 4  | 120 | 18 |
| 2-isopropylmalate synthase                                                                                                         | BU251_00935 | 56  | 112 | 33  | 50 | 6  | 124 | 5  |
| hypothetical protein                                                                                                               | BU251_01680 | 53  | 105 | 48  | 44 | 18 | 131 | 4  |
| flagellar motor protein MotB                                                                                                       | BU251_07995 | 23  | 127 | 1   | 43 | 2  | 108 | 16 |
| signal transducer with HAMP signal, GAF transducer and GGDEF (diguanylate cyclase) domains                                         | BU251_05635 | 51  | 106 | 17  | 52 | 1  | 113 | 35 |
| ATP-dependent Zn-protease                                                                                                          | BU251_07530 | 62  | 107 | 33  | 41 | 8  | 121 | 9  |
| type II secretory pathway component GspD/PuID (secretin)                                                                           | BU251_05575 | 57  | 174 | 111 | 31 | 23 | 63  | 5  |
| type II secretory pathway component GspD/PuID (secretin) with additional STN domain                                                | BU251_05205 | 56  | 131 | 41  | 40 | 9  | 96  | 20 |

|                                                                              |             |    |     |    |    |    |     |    |
|------------------------------------------------------------------------------|-------------|----|-----|----|----|----|-----|----|
| phosphohexamutase superfamily                                                | BU251_05530 | 54 | 100 | 1  | 56 | 0  | 110 | 13 |
| phosphopyruvate hydratase                                                    | BU251_07525 | 46 | 58  | 11 | 61 | 8  | 144 | 24 |
| 30S ribosomal protein S4                                                     | BU251_03220 | 24 | 114 | 22 | 40 | 8  | 106 | 10 |
| short-chain dehydrogenase/reductase (SDR)                                    | BU251_07850 | 28 | 106 | 2  | 41 | 13 | 113 | 12 |
| DNA polymerase I                                                             | BU251_01300 | 97 | 93  | 42 | 48 | 9  | 115 | 24 |
| glycine--tRNA ligase                                                         | BU251_04590 | 59 | 104 | 30 | 42 | 4  | 109 | 7  |
| LemA/RetS hybrid sensor kinase-response regulator protein                    | BU251_06830 | 21 | 101 | 12 | 50 | 9  | 104 | 23 |
| hypothetical protein                                                         | BU251_08610 | 49 | 139 | 56 | 45 | 4  | 70  | 13 |
| glycogen branching enzyme, GH-57-type, archaeal                              | BU251_01130 | 63 | 124 | 45 | 32 | 1  | 97  | 16 |
| phenylalanyl-tRNA synthetase beta chain                                      | BU251_09435 | 75 | 103 | 23 | 38 | 5  | 112 | 19 |
| His-Xaa-Ser system radical SAM maturase HxsB                                 | BU251_04195 | 55 | 95  | 30 | 47 | 16 | 109 | 21 |
| carbohydrate-selective porin                                                 | BU251_08565 | 50 | 132 | 10 | 38 | 13 | 80  | 13 |
| acetolactate synthase large subunit                                          | BU251_00920 | 59 | 99  | 23 | 43 | 3  | 107 | 7  |
| homocitrate synthase                                                         | BU251_01105 | 46 | 98  | 9  | 37 | 2  | 112 | 4  |
| PIIT-related nuclease/ATPase with N-terminal membrane domain                 | BU251_06155 | 37 | 114 | 21 | 37 | 8  | 93  | 12 |
| cell division protein FtsK                                                   | BU251_05950 | 84 | 102 | 45 | 35 | 10 | 105 | 10 |
| Lipid A export ATP-binding/permease protein MsbA                             | BU251_00825 | 68 | 95  | 45 | 53 | 15 | 94  | 0  |
| outer membrane chaperone Skp (OmpH)                                          | BU251_00670 | 21 | 88  | 15 | 34 | 11 | 119 | 1  |
| hypothetical protein                                                         | BU251_08110 | 90 | 98  | 30 | 40 | 1  | 101 | 4  |
| type II secretory protein GspE                                               | BU251_08460 | 64 | 113 | 25 | 31 | 0  | 94  | 12 |
| translation elongation factor G                                              | BU251_03075 | 78 | 85  | 23 | 42 | 4  | 110 | 2  |
| uptake hydrogenase large subunit                                             | BU251_07790 | 52 | 100 | 28 | 39 | 9  | 98  | 13 |
| rubrerythrin                                                                 | BU251_08710 | 22 | 83  | 8  | 36 | 7  | 117 | 8  |
| membrane-associated protein with peptidoglycan-binding domains OmpA and LysM | BU251_03585 | 37 | 94  | 5  | 38 | 0  | 100 | 25 |
| homoserine dehydrogenase                                                     | BU251_04810 | 46 | 88  | 37 | 32 | 8  | 111 | 6  |
| short-chain dehydrogenase/reductase (classical (c) SDR)                      | BU251_07470 | 28 | 98  | 0  | 36 | 10 | 96  | 4  |
| pyruvate:ferredoxin oxidoreductase, beta subunit                             | BU251_00540 | 31 | 94  | 15 | 35 | 14 | 100 | 3  |

|                                                                                                   |             |     |     |    |    |    |     |    |
|---------------------------------------------------------------------------------------------------|-------------|-----|-----|----|----|----|-----|----|
| protein with TMH, SAF and Flp pilus assembly protein RcpC domains                                 | BU251_00055 | 34  | 100 | 18 | 44 | 8  | 82  | 14 |
| hypothetical protein                                                                              | BU251_04665 | 51  | 93  | 28 | 25 | 1  | 108 | 18 |
| preprotein translocase subunit SecA                                                               | BU251_07115 | 107 | 78  | 29 | 44 | 4  | 103 | 3  |
| filamentation induced by cAMP protein Fic                                                         | BU251_02690 | 41  | 96  | 34 | 34 | 9  | 94  | 21 |
| DNA-binding transcriptional regulator, LacI/PurRfamily                                            | BU251_04575 | 32  | 95  | 8  | 34 | 8  | 95  | 5  |
| citramalate synthase                                                                              | BU251_04780 | 59  | 91  | 30 | 28 | 8  | 103 | 0  |
| cation transporter                                                                                | BU251_07400 | 121 | 85  | 26 | 45 | 8  | 91  | 3  |
| phosphoribosylformylglycinamide synthase II                                                       | BU251_07255 | 107 | 76  | 42 | 47 | 13 | 98  | 22 |
| glyA                                                                                              | BU251_07210 | 46  | 92  | 5  | 40 | 3  | 88  | 1  |
| lipoprotein-anchoring transpeptidase ErfK/SrfK                                                    | BU251_07955 | 30  | 88  | 8  | 46 | 4  | 85  | 1  |
| replicative DNA helicase                                                                          | BU251_00660 | 51  | 85  | 22 | 38 | 7  | 94  | 33 |
| hypothetical protein                                                                              | BU251_00140 | 19  | 91  | 13 | 43 | 4  | 81  | 7  |
| type II/IV secretion system ATP hydrolase TadA/VirB11/CpaF, TadA subfamily                        | BU251_01160 | 48  | 75  | 10 | 34 | 0  | 106 | 26 |
| acetyl-CoA carboxylase biotin carboxylase subunit                                                 | BU251_03800 | 51  | 86  | 12 | 30 | 6  | 99  | 24 |
| sensor histidine kinase Walk                                                                      | BU251_06285 | 84  | 69  | 30 | 33 | 0  | 113 | 18 |
| hypothetical protein                                                                              | BU251_00620 | 44  | 87  | 6  | 33 | 2  | 95  | 18 |
| hypothetical protein                                                                              | BU251_02750 | 32  | 89  | 1  | 41 | 7  | 81  | 15 |
| DNA topoisomerase I                                                                               | BU251_00965 | 76  | 80  | 24 | 31 | 4  | 100 | 6  |
| hypothetical protein                                                                              | BU251_03520 | 35  | 100 | 19 | 30 | 5  | 77  | 28 |
| type II restriction endonuclease, TdeIII                                                          | BU251_09035 | 32  | 90  | 15 | 34 | 6  | 80  | 13 |
| TonB-dependent receptor                                                                           | BU251_03850 | 74  | 103 | 41 | 25 | 28 | 73  | 5  |
| D-alanine/D-glutamate or branched-chain amino acid aminotransferase                               | BU251_06200 | 32  | 97  | 16 | 34 | 12 | 70  | 24 |
| nicotinamidase/pyrazinamidase                                                                     | BU251_09520 | 31  | 99  | 23 | 27 | 9  | 76  | 1  |
| type II secretion system protein E                                                                | BU251_05620 | 63  | 78  | 25 | 29 | 3  | 93  | 0  |
| ABC-type transporter Mla maintaining outer membrane lipid asymmetry, periplasmatic component MlaD | BU251_06165 | 23  | 90  | 4  | 31 | 1  | 76  | 23 |

|                                                                                                  |             |     |     |    |    |    |     |    |
|--------------------------------------------------------------------------------------------------|-------------|-----|-----|----|----|----|-----|----|
| type II and III secretion system protein                                                         | BU251_08410 | 58  | 101 | 11 | 26 | 1  | 70  | 12 |
| valine--tRNA ligase                                                                              | BU251_04775 | 106 | 67  | 30 | 34 | 1  | 95  | 15 |
| dihydrodipicolinate synthase                                                                     | BU251_05300 | 31  | 56  | 21 | 45 | 1  | 95  | 10 |
| type II secretion system protein E                                                               | BU251_05625 | 64  | 79  | 29 | 28 | 3  | 88  | 6  |
| adenylosuccinate lyase                                                                           | BU251_07260 | 48  | 82  | 34 | 27 | 4  | 84  | 8  |
| type II secretion system protein E                                                               | BU251_05200 | 63  | 73  | 28 | 27 | 1  | 91  | 11 |
| glycogen synthase, ADP-glucose transglucosylase                                                  | BU251_01305 | 54  | 80  | 32 | 27 | 5  | 82  | 17 |
| twitching motility protein PilT                                                                  | BU251_07125 | 41  | 76  | 20 | 28 | 4  | 82  | 11 |
| acetate kinase                                                                                   | BU251_02105 | 41  | 71  | 16 | 33 | 10 | 80  | 1  |
| transcriptional regulator                                                                        | BU251_00245 | 37  | 74  | 22 | 29 | 9  | 82  | 29 |
| secreted protein containing molecular chaperone<br>IbpA, HSP20 family                            | BU251_06465 | 23  | 72  | 14 | 21 | 6  | 90  | 6  |
| xanthine dehydrogenase, molybdenum binding<br>subunit                                            | BU251_01525 | 84  | 65  | 16 | 36 | 4  | 80  | 6  |
| membrane or secreted protein containing<br>peptidoglycan-binding Lysin subgroup domain<br>(LysM) | BU251_04695 | 19  | 72  | 12 | 30 | 7  | 79  | 12 |
| hypothetical protein                                                                             | BU251_03790 | 22  | 85  | 2  | 23 | 4  | 73  | 4  |
| transcriptional regulator                                                                        | BU251_03940 | 27  | 80  | 18 | 25 | 1  | 75  | 1  |
| dolichyl-phosphooligosaccharide-protein<br>glycotransferase                                      | BU251_01235 | 99  | 73  | 39 | 32 | 2  | 75  | 6  |
| peptidyl-prolyl cis-trans isomerase                                                              | BU251_00575 | 59  | 80  | 8  | 26 | 4  | 71  | 4  |
| phosphoenolpyruvate carboxykinase                                                                | BU251_07675 | 65  | 73  | 25 | 28 | 1  | 75  | 7  |
| serine--tRNA ligase                                                                              | BU251_06770 | 48  | 73  | 15 | 23 | 3  | 79  | 20 |
| putative chromosome-partitioning protein ParB                                                    | BU251_02435 | 38  | 78  | 17 | 21 | 0  | 75  | 1  |
| periplasmic solute-binding protein of ABC<br>transporter                                         | BU251_08595 | 28  | 23  | 0  | 33 | 13 | 117 | 6  |
| glycerol-3-phosphate ABC transporter ATP-<br>bindingprotein                                      | BU251_02960 | 41  | 74  | 11 | 24 | 2  | 74  | 4  |
| aspartate-semialdehyde dehydrogenase                                                             | BU251_05370 | 37  | 71  | 1  | 27 | 2  | 75  | 4  |
| GDP-mannose 4,6-dehydratase                                                                      | BU251_04420 | 44  | 64  | 8  | 28 | 1  | 77  | 24 |
| phosphate regulon sensor protein PhoR (SphS)                                                     | BU251_08525 | 56  | 60  | 8  | 31 | 3  | 78  | 13 |

|                                                                               |             |     |    |    |    |    |    |    |
|-------------------------------------------------------------------------------|-------------|-----|----|----|----|----|----|----|
| type II/IV secretion system ATP hydrolase<br>TadA/VirB11/CpaF, TadA subfamily | BU251_01170 | 48  | 61 | 8  | 28 | 1  | 79 | 0  |
| lysine--tRNA ligase                                                           | BU251_06215 | 56  | 71 | 19 | 25 | 3  | 72 | 6  |
| macrolide export ATP-binding/permease protein<br>MacB                         | BU251_01860 | 72  | 61 | 12 | 37 | 6  | 69 | 4  |
| D,D-heptose 7-phosphate kinase                                                | BU251_02245 | 37  | 73 | 26 | 21 | 5  | 73 | 16 |
| chorismate mutase                                                             | BU251_03920 | 40  | 64 | 12 | 26 | 5  | 77 | 12 |
| phosphoenolpyruvate synthase                                                  | BU251_02360 | 98  | 60 | 31 | 30 | 6  | 75 | 6  |
| sugar dehydratase                                                             | BU251_04395 | 37  | 69 | 19 | 24 | 4  | 72 | 20 |
| aspartyl-tRNA synthetase                                                      | BU251_04700 | 54  | 59 | 31 | 30 | 11 | 74 | 35 |
| glutamine--fructose-6-phosphate transaminase<br>(isomerizing)                 | BU251_08340 | 66  | 60 | 37 | 26 | 7  | 76 | 7  |
| protein containing glucosylceramidase domain                                  | BU251_00225 | 82  | 65 | 47 | 21 | 8  | 76 | 24 |
| phosphoribosylformylglycinamide cyclo-ligase                                  | BU251_07235 | 36  | 72 | 16 | 19 | 6  | 70 | 16 |
| 50S ribosomal protein L5                                                      | BU251_03150 | 22  | 67 | 10 | 17 | 4  | 76 | 19 |
| hypothetical protein                                                          | BU251_00220 | 61  | 71 | 12 | 22 | 0  | 65 | 8  |
| threonine--tRNA ligase                                                        | BU251_09480 | 65  | 64 | 33 | 21 | 4  | 73 | 5  |
| hypothetical protein                                                          | BU251_05255 | 95  | 71 | 19 | 23 | 5  | 64 | 13 |
| D-beta-D-heptose 7-phosphate kinase                                           | BU251_01045 | 37  | 59 | 18 | 27 | 6  | 71 | 13 |
| excinuclease ABC subunit A                                                    | BU251_05260 | 106 | 53 | 13 | 33 | 4  | 70 | 2  |
| cell division trigger factor                                                  | BU251_01080 | 34  | 59 | 1  | 23 | 1  | 74 | 5  |
| aspartate kinase                                                              | BU251_04785 | 44  | 58 | 7  | 27 | 8  | 70 | 11 |
| hypothetical protein                                                          | BU251_08365 | 31  | 69 | 4  | 28 | 4  | 58 | 12 |
| pilus assembly protein PilC                                                   | BU251_05610 | 43  | 67 | 8  | 28 | 1  | 59 | 7  |
| acetylglutamate kinase                                                        | BU251_05335 | 31  | 71 | 11 | 23 | 2  | 60 | 3  |
| cell division protein FtsH                                                    | BU251_09340 | 57  | 55 | 15 | 27 | 2  | 67 | 28 |
| UDP-glucose 6-dehydrogenase                                                   | BU251_02990 | 49  | 57 | 12 | 22 | 1  | 70 | 4  |
| secreted protein containing Sulphatase-<br>modifyingfactor domain             | BU251_02725 | 55  | 55 | 29 | 30 | 2  | 61 | 32 |
| type IV pili twitching motility protein PilT                                  | BU251_08545 | 37  | 62 | 6  | 22 | 4  | 62 | 16 |
| serine O-acetyltransferase                                                    | BU251_06140 | 25  | 61 | 16 | 18 | 3  | 65 | 8  |

|                                                                                                 |             |    |    |    |    |    |    |    |
|-------------------------------------------------------------------------------------------------|-------------|----|----|----|----|----|----|----|
| signal transduction histidine kinase                                                            | BU251_02005 | 68 | 67 | 22 | 17 | 6  | 60 | 11 |
| 3-isopropylmalate dehydrogenase                                                                 | BU251_05380 | 38 | 55 | 14 | 29 | 10 | 59 | 8  |
| hypothetical protein                                                                            | BU251_07160 | 37 | 67 | 10 | 23 | 7  | 53 | 0  |
| argininosuccinate synthase                                                                      | BU251_05320 | 44 | 57 | 11 | 18 | 0  | 68 | 9  |
| DNA polymerase III beta subunit                                                                 | BU251_00010 | 42 | 57 | 1  | 23 | 4  | 62 | 9  |
| ATP-dependent Clp protease proteolytic subunit                                                  | BU251_01085 | 22 | 53 | 14 | 25 | 6  | 63 | 13 |
| nucleoside-diphosphate sugar epimerase                                                          | BU251_04330 | 39 | 53 | 12 | 25 | 11 | 62 | 4  |
| expressed secreted protein of unknown function                                                  | BU251_07650 | 18 | 61 | 9  | 14 | 2  | 65 | 4  |
| 30S ribosomal protein S7                                                                        | BU251_03070 | 18 | 59 | 3  | 18 | 1  | 61 | 2  |
| phosphate acetyltransferase                                                                     | BU251_02100 | 34 | 55 | 3  | 23 | 3  | 59 | 1  |
| hypothetical protein                                                                            | BU251_05220 | 60 | 61 | 25 | 18 | 1  | 59 | 1  |
| LL-diaminopimelate aminotransferase                                                             | BU251_05290 | 43 | 57 | 4  | 19 | 4  | 61 | 13 |
| hypothetical protein                                                                            | BU251_07480 | 59 | 83 | 37 | 10 | 8  | 45 | 6  |
| hypothetical protein                                                                            | BU251_07935 | 27 | 36 | 5  | 19 | 1  | 81 | 21 |
| adenine phosphoribosyltransferase                                                               | BU251_04570 | 19 | 56 | 16 | 17 | 4  | 62 | 2  |
| bifunctional<br>phosphoribosylaminoimidazolecarboxamide<br>formyltransferase/IMP cyclohydrolase | BU251_08030 | 55 | 58 | 34 | 15 | 0  | 61 | 4  |
| hypothetical protein                                                                            | BU251_08680 | 34 | 60 | 13 | 20 | 5  | 54 | 13 |
| signal peptidase I                                                                              | BU251_03890 | 23 | 59 | 18 | 17 | 4  | 58 | 8  |
| hypothetical protein                                                                            | BU251_08450 | 56 | 62 | 23 | 16 | 4  | 55 | 1  |
| carboxyl-terminal protease                                                                      | BU251_05005 | 48 | 59 | 28 | 20 | 1  | 54 | 18 |
| hypothetical protein                                                                            | BU251_07980 | 82 | 48 | 18 | 25 | 6  | 59 | 6  |
| chorismate synthase                                                                             | BU251_00950 | 37 | 57 | 12 | 21 | 3  | 54 | 6  |
| 50S ribosomal protein L1                                                                        | BU251_03040 | 24 | 59 | 13 | 15 | 9  | 58 | 6  |
| glucose-6-phosphate isomerase                                                                   | BU251_06840 | 55 | 53 | 18 | 20 | 4  | 59 | 19 |
| 50S ribosomal protein L17                                                                       | BU251_03230 | 21 | 61 | 17 | 16 | 4  | 53 | 2  |
| isocitrate dehydrogenase                                                                        | BU251_03255 | 39 | 54 | 6  | 21 | 1  | 55 | 1  |
| 3-oxoacyl-[acyl-carrier-protein] reductase                                                      | BU251_05405 | 26 | 54 | 11 | 17 | 0  | 59 | 15 |

|                                                               |             |    |    |    |    |    |    |    |
|---------------------------------------------------------------|-------------|----|----|----|----|----|----|----|
| secreted protein containing peptidoglycan binding-like domain | BU251_07685 | 14 | 60 | 9  | 24 | 5  | 46 | 1  |
| protein with tandem amino-acid binding ACT domain             | BU251_03865 | 14 | 31 | 4  | 21 | 5  | 77 | 18 |
| V-type ATP synthase subunit A                                 | BU251_08230 | 64 | 62 | 36 | 16 | 1  | 51 | 6  |
| prolyl-tRNA synthetase, bacterial type                        | BU251_01165 | 47 | 50 | 8  | 20 | 4  | 57 | 4  |
| ATP-dependent RNA helicase RhlE                               | BU251_03485 | 47 | 50 | 23 | 14 | 11 | 63 | 15 |
| UDP-N-acetyl-D-glucosamine dehydrogenase                      | BU251_00395 | 47 | 56 | 10 | 16 | 1  | 54 | 4  |
| nucleoside diphosphate kinase                                 | BU251_09525 | 19 | 50 | 1  | 20 | 4  | 56 | 6  |
| hypothetical protein                                          | BU251_02845 | 85 | 52 | 24 | 15 | 6  | 58 | 7  |
| hypothetical protein                                          | BU251_09550 | 55 | 58 | 27 | 19 | 3  | 47 | 10 |
| aspartate aminotransferase                                    | BU251_03235 | 43 | 50 | 3  | 20 | 4  | 54 | 1  |
| HlyD family secretion protein                                 | BU251_00740 | 31 | 58 | 1  | 20 | 4  | 46 | 1  |
| lipid A deacylase PagL                                        | BU251_06260 | 22 | 63 | 3  | 15 | 1  | 45 | 4  |
| hypothetical protein                                          | BU251_04295 | 64 | 51 | 24 | 18 | 9  | 53 | 3  |
| LSU ribosomal protein L25                                     | BU251_00630 | 25 | 51 | 11 | 22 | 4  | 49 | 12 |
| glycogen phosphorylase                                        | BU251_02170 | 76 | 50 | 23 | 15 | 7  | 56 | 18 |
| histidinol-phosphate transaminase                             | BU251_03915 | 41 | 47 | 6  | 19 | 4  | 55 | 11 |
| aminotransferase                                              | BU251_04305 | 41 | 50 | 21 | 17 | 6  | 54 | 3  |
| glutamyl-tRNA synthetase and Glutamyl-tRNA(Gln) synthetase    | BU251_09360 | 49 | 48 | 8  | 20 | 1  | 53 | 11 |
| rubredoxin-oxygen (nitric oxide) oxidoreductase               | BU251_00555 | 44 | 42 | 10 | 22 | 6  | 56 | 7  |
| 50S ribosomal protein L4                                      | BU251_03095 | 24 | 53 | 9  | 18 | 3  | 49 | 3  |
| hypothetical protein                                          | BU251_04285 | 64 | 51 | 25 | 17 | 6  | 53 | 5  |
| hypothetical protein                                          | BU251_07835 | 57 | 51 | 16 | 22 | 9  | 47 | 18 |
| 50S ribosomal protein L10                                     | BU251_03045 | 20 | 54 | 7  | 12 | 4  | 53 | 10 |
| AAA family ATPase                                             | BU251_08745 | 67 | 47 | 21 | 15 | 2  | 58 | 19 |
| PTS fructose/mannitol-specific subunit IIA [OP3 merged]       | BU251_00865 | 17 | 52 | 8  | 17 | 3  | 49 | 13 |
| hypothetical protein                                          | BU251_05915 | 22 | 47 | 1  | 19 | 1  | 52 | 14 |
| glutamate racemase                                            | BU251_01600 | 29 | 52 | 10 | 14 | 4  | 51 | 2  |



|                                                                        |             |     |    |    |    |   |    |    |
|------------------------------------------------------------------------|-------------|-----|----|----|----|---|----|----|
| triose-phosphate isomerase                                             | BU251_04060 | 28  | 14 | 0  | 30 | 6 | 73 | 8  |
| hypothetical protein                                                   | BU251_08385 | 85  | 50 | 13 | 18 | 9 | 50 | 2  |
| UDP-2,3-diacetylglucosamine pyrophosphatase                            | BU251_00690 | 31  | 53 | 6  | 17 | 4 | 47 | 8  |
| 30S ribosomal protein S5                                               | BU251_03175 | 18  | 50 | 2  | 17 | 1 | 50 | 3  |
| histidyl-tRNA synthetase                                               | BU251_04705 | 41  | 42 | 12 | 21 | 2 | 54 | 6  |
| hypothetical protein                                                   | BU251_08735 | 39  | 53 | 8  | 14 | 0 | 48 | 9  |
| arabinose 5-phosphate isomerase                                        | BU251_01060 | 34  | 50 | 16 | 14 | 6 | 50 | 14 |
| RND multidrug efflux transporter                                       | BU251_02070 | 112 | 37 | 19 | 24 | 6 | 54 | 4  |
| two-component sensor histidine kinase                                  | BU251_02800 | 40  | 48 | 20 | 15 | 1 | 51 | 23 |
| hypothetical protein                                                   | BU251_08750 | 46  | 46 | 8  | 19 | 0 | 48 | 9  |
| 30S ribosomal protein S1                                               | BU251_05515 | 58  | 49 | 30 | 14 | 8 | 50 | 8  |
| tRNA nucleotidyltransferase, CC-adding                                 | BU251_07185 | 56  | 38 | 29 | 18 | 7 | 56 | 1  |
| 50S ribosomal protein L6                                               | BU251_03165 | 20  | 48 | 11 | 13 | 4 | 50 | 3  |
| lipid hydroperoxide peroxidase                                         | BU251_03560 | 30  | 49 | 1  | 19 | 6 | 44 | 11 |
| hypothetical protein                                                   | BU251_04365 | 44  | 45 | 16 | 14 | 8 | 53 | 6  |
| asnC family transcriptional regulator                                  | BU251_06855 | 19  | 53 | 4  | 14 | 2 | 45 | 8  |
| phosphate regulon transcriptional regulatory protein PhoB (SphR)       | BU251_08530 | 28  | 42 | 4  | 15 | 6 | 55 | 1  |
| histidine kinase                                                       | BU251_06870 | 26  | 48 | 1  | 15 | 6 | 48 | 8  |
| transmembrane and TPR repeat-containing protein                        | BU251_04045 | 88  | 51 | 29 | 15 | 4 | 44 | 1  |
| DNA polymerase III                                                     | BU251_04620 | 64  | 45 | 28 | 10 | 4 | 54 | 18 |
| aminopeptidase                                                         | BU251_05970 | 42  | 43 | 4  | 16 | 2 | 51 | 1  |
| hypothetical protein                                                   | BU251_07155 | 20  | 56 | 4  | 13 | 0 | 40 | 8  |
| ADP-glyceromanno-heptose 6-epimerase                                   | BU251_00975 | 37  | 48 | 17 | 17 | 3 | 44 | 8  |
| response regulator receiver modulated metal dependent phosphohydrolase | BU251_05615 | 42  | 46 | 7  | 16 | 2 | 47 | 4  |
| mannosylglucosyl-3-phosphoglycerate phosphatase                        | BU251_01100 | 67  | 57 | 36 | 14 | 1 | 38 | 1  |
| 3-isopropylmalate dehydratase large subunit                            | BU251_05390 | 46  | 47 | 6  | 17 | 1 | 44 | 3  |
| glycosyltransferase                                                    | BU251_01000 | 77  | 38 | 25 | 14 | 8 | 56 | 5  |
| 50S ribosomal protein L2                                               | BU251_03105 | 31  | 41 | 7  | 16 | 8 | 50 | 6  |

|                                                                  |             |    |    |    |    |   |    |    |
|------------------------------------------------------------------|-------------|----|----|----|----|---|----|----|
| argininosuccinate lyase                                          | BU251_05315 | 50 | 45 | 9  | 14 | 1 | 48 | 11 |
| gpsA                                                             | BU251_04830 | 36 | 49 | 21 | 13 | 9 | 45 | 8  |
| O-acetylhomoserine<br>aminocarboxypropyltransferase              | BU251_06620 | 47 | 37 | 14 | 21 | 1 | 48 | 6  |
| hypothetical protein                                             | BU251_09455 | 24 | 43 | 6  | 19 | 3 | 45 | 11 |
| hypothetical protein                                             | BU251_05595 | 40 | 50 | 6  | 16 | 6 | 41 | 2  |
| type I restriction-modification system subunit M                 | BU251_02600 | 59 | 42 | 10 | 17 | 1 | 47 | 4  |
| NAD-dependent dehydratase                                        | BU251_02995 | 35 | 48 | 16 | 15 | 1 | 42 | 1  |
| UDP-3-O-[3-hydroxymyristoyl] glucosamine N-<br>acyltransferase   | BU251_00675 | 37 | 41 | 8  | 13 | 4 | 52 | 18 |
| response regulator PleD                                          | BU251_04005 | 45 | 34 | 2  | 16 | 1 | 56 | 1  |
| imidazoleglycerol-phosphate dehydratase                          | BU251_05085 | 23 | 46 | 6  | 15 | 3 | 44 | 4  |
| hypothetical protein                                             | BU251_01645 | 98 | 42 | 16 | 14 | 2 | 49 | 6  |
| Single-stranded DNA-binding protein                              | BU251_00645 | 17 | 39 | 9  | 16 | 1 | 49 | 25 |
| adenylosuccinate synthetase                                      | BU251_01110 | 47 | 41 | 21 | 18 | 2 | 45 | 6  |
| hypothetical protein                                             | BU251_01430 | 16 | 52 | 12 | 12 | 2 | 41 | 12 |
| transcription termination/antitermination protein<br>NusG        | BU251_03030 | 20 | 42 | 3  | 17 | 1 | 45 | 0  |
| phosphoribosylamine--glycine ligase                              | BU251_07230 | 45 | 39 | 5  | 15 | 5 | 51 | 2  |
| 30S ribosomal protein S3                                         | BU251_03120 | 27 | 49 | 11 | 13 | 1 | 42 | 15 |
| phosphate starvation-inducible protein PhoH,<br>predicted ATPase | BU251_04690 | 36 | 38 | 4  | 20 | 4 | 46 | 21 |
| hypothetical protein                                             | BU251_07005 | 17 | 47 | 0  | 12 | 1 | 44 | 6  |
| sensory box histidine kinase/response regulator                  | BU251_00720 | 72 | 44 | 23 | 15 | 5 | 44 | 6  |
| UMP kinase                                                       | BU251_00840 | 26 | 41 | 4  | 13 | 4 | 49 | 21 |
| hypothetical protein                                             | BU251_01400 | 30 | 47 | 7  | 12 | 8 | 44 | 11 |
| histidinol dehydrogenase                                         | BU251_05090 | 45 | 39 | 18 | 20 | 1 | 43 | 11 |
| threonine synthase                                               | BU251_04805 | 38 | 38 | 11 | 20 | 7 | 44 | 2  |
| methylthioadenosine phosphorylase                                | BU251_05705 | 31 | 48 | 15 | 15 | 2 | 39 | 4  |
| trehalose-6-phosphate synthase                                   | BU251_03545 | 57 | 45 | 25 | 13 | 4 | 43 | 12 |
| NGG1p interacting factor NIF3                                    | BU251_03995 | 37 | 49 | 6  | 14 | 1 | 38 | 7  |

|                                                                     |             |    |    |    |    |   |    |    |
|---------------------------------------------------------------------|-------------|----|----|----|----|---|----|----|
| galactose-1-phosphate uridylyltransferase                           | BU251_04250 | 39 | 41 | 13 | 17 | 0 | 42 | 11 |
| transcriptional regulator                                           | BU251_05945 | 31 | 47 | 12 | 14 | 3 | 39 | 11 |
| hypothetical protein                                                | BU251_03445 | 38 | 46 | 5  | 16 | 1 | 38 | 1  |
| phosphoheptose isomerase                                            | BU251_03780 | 21 | 47 | 1  | 14 | 4 | 39 | 0  |
| leucine--tRNA ligase                                                | BU251_07605 | 93 | 43 | 26 | 12 | 0 | 45 | 2  |
| DNA ligase                                                          | BU251_05855 | 74 | 40 | 28 | 13 | 6 | 47 | 11 |
| hypothetical protein                                                | BU251_07920 | 37 | 35 | 6  | 17 | 4 | 47 | 13 |
| RNA polymerase sigma factor RpoD                                    | BU251_03985 | 60 | 36 | 24 | 15 | 4 | 48 | 15 |
| hypothetical protein                                                | BU251_05850 | 20 | 41 | 13 | 12 | 4 | 45 | 7  |
| hypothetical protein                                                | BU251_05190 | 15 | 41 | 6  | 17 | 0 | 40 | 8  |
| electron transfer flavoprotein subunit alpha                        | BU251_04015 | 43 | 37 | 7  | 15 | 3 | 45 | 4  |
| 3-dehydroquinate synthase                                           | BU251_03705 | 39 | 38 | 13 | 14 | 8 | 45 | 10 |
| hypothetical protein                                                | BU251_08615 | 22 | 49 | 8  | 9  | 1 | 39 | 6  |
| hypothetical protein                                                | BU251_00870 | 46 | 41 | 4  | 17 | 4 | 38 | 1  |
| 6-phosphofructokinase                                               | BU251_00905 | 35 | 41 | 11 | 16 | 1 | 40 | 15 |
| 2-dehydropantoate 2-reductase                                       | BU251_04670 | 33 | 45 | 11 | 11 | 7 | 40 | 4  |
| UDP-N-acetylglucosamine 1-carboxyvinyltransferase                   | BU251_01335 | 46 | 38 | 11 | 13 | 1 | 45 | 1  |
| excinuclease ABC subunit B                                          | BU251_04755 | 84 | 33 | 4  | 19 | 1 | 43 | 1  |
| phosphate transport system regulatory protein PhoU                  | BU251_06640 | 26 | 43 | 9  | 13 | 6 | 40 | 1  |
| hypothetical protein                                                | BU251_08670 | 39 | 43 | 6  | 14 | 4 | 39 | 10 |
| rubrerythrin-2                                                      | BU251_08345 | 20 | 38 | 9  | 14 | 4 | 43 | 13 |
| bifunctional ornithine acetyltransferase/N-acetylglutamate synthase | BU251_05340 | 42 | 48 | 1  | 7  | 0 | 39 | 7  |
| tyrosine--tRNA ligase                                               | BU251_05510 | 47 | 42 | 10 | 12 | 1 | 41 | 4  |
| hypothetical protein                                                | BU251_09505 | 20 | 36 | 2  | 16 | 3 | 43 | 2  |
| LPS export ABC transporter ATP-binding protein                      | BU251_01075 | 27 | 40 | 3  | 16 | 5 | 38 | 1  |
| anthranilate synthase component I                                   | BU251_05060 | 55 | 39 | 23 | 12 | 1 | 43 | 1  |
| tryptophan synthase subunit beta                                    | BU251_06020 | 41 | 39 | 20 | 12 | 3 | 42 | 4  |

|                                                  |             |    |    |    |    |    |    |    |
|--------------------------------------------------|-------------|----|----|----|----|----|----|----|
| saccharopine dehydrogenase                       | BU251_06225 | 46 | 31 | 11 | 17 | 4  | 45 | 11 |
| thymidylate synthase (FAD)                       | BU251_07300 | 28 | 42 | 8  | 13 | 4  | 39 | 2  |
| hypothetical protein                             | BU251_02705 | 57 | 38 | 53 | 15 | 21 | 41 | 57 |
| expressed secreted protein of unknown function   | BU251_01035 | 12 | 39 | 9  | 15 | 6  | 39 | 12 |
| hypothetical protein                             | BU251_01295 | 30 | 42 | 5  | 8  | 2  | 43 | 10 |
| glutamate-5-semialdehyde dehydrogenase           | BU251_05545 | 45 | 43 | 18 | 16 | 5  | 34 | 5  |
| acetyl-CoA synthase corrinoid activation protein | BU251_04960 | 69 | 33 | 7  | 13 | 5  | 46 | 13 |
| ornithine carbamoyltransferase                   | BU251_05325 | 36 | 37 | 10 | 17 | 4  | 38 | 1  |
| N-acetyl-gamma-glutamyl-phosphate reductase      | BU251_05345 | 38 | 37 | 13 | 12 | 2  | 43 | 4  |
| type II secretion system protein F               | BU251_08455 | 45 | 39 | 13 | 15 | 1  | 37 | 8  |
| hypothetical protein                             | BU251_09530 | 34 | 40 | 10 | 13 | 7  | 38 | 11 |
| GDP-mannose 4,6-dehydratase                      | BU251_02255 | 37 | 39 | 12 | 15 | 3  | 37 | 1  |
| peptide deformylase                              | BU251_05075 | 29 | 37 | 2  | 14 | 8  | 40 | 8  |
| hypothetical protein                             | BU251_07885 | 46 | 39 | 11 | 12 | 1  | 40 | 2  |
| hypothetical protein                             | BU251_07455 | 23 | 38 | 4  | 16 | 4  | 36 | 4  |
| 1-deoxy-D-xylulose-5-phosphate synthase          | BU251_09385 | 68 | 39 | 20 | 11 | 5  | 40 | 1  |
| hypothetical protein                             | BU251_06370 | 61 | 47 | 24 | 2  | 2  | 41 | 6  |
| F0F1 ATP synthase subunit beta                   | BU251_08470 | 53 | 34 | 8  | 11 | 1  | 45 | 11 |
| amidophosphoribosyltransferase                   | BU251_03495 | 54 | 35 | 10 | 18 | 1  | 36 | 4  |
| ribose 1,5-bisphosphate isomerase                | BU251_06360 | 27 | 36 | 0  | 12 | 2  | 41 | 10 |
| hypothetical protein                             | BU251_00285 | 44 | 40 | 11 | 15 | 1  | 34 | 13 |
| thioredoxin                                      | BU251_00490 | 31 | 35 | 8  | 16 | 0  | 38 | 2  |
| aspartate aminotransferase family protein        | BU251_05330 | 44 | 39 | 5  | 12 | 5  | 38 | 13 |
| CTP synthetase                                   | BU251_02160 | 59 | 40 | 20 | 10 | 6  | 38 | 5  |
| hypothetical protein                             | BU251_04495 | 23 | 35 | 4  | 19 | 2  | 34 | 4  |
| NAD+ synthase                                    | BU251_06865 | 61 | 39 | 22 | 10 | 1  | 39 | 5  |
| hypothetical protein                             | BU251_08605 | 55 | 35 | 25 | 12 | 6  | 41 | 18 |
| phenylalanine--tRNA ligase subunit alpha         | BU251_09440 | 39 | 32 | 5  | 14 | 1  | 41 | 0  |
| 4-alpha-glucanotransferase                       | BU251_04235 | 70 | 38 | 19 | 14 | 0  | 34 | 0  |

|                                                                       |             |    |    |    |    |   |    |    |
|-----------------------------------------------------------------------|-------------|----|----|----|----|---|----|----|
| ATP synthase F0 sector subunit b                                      | BU251_08485 | 28 | 37 | 1  | 16 | 4 | 33 | 2  |
| outer membrane efflux protein                                         | BU251_00735 | 62 | 41 | 16 | 13 | 1 | 31 | 5  |
| hypothetical protein                                                  | BU251_05585 | 23 | 38 | 2  | 11 | 6 | 36 | 5  |
| deoxyguanosinetriphosphate triphosphohydrolase                        | BU251_03730 | 47 | 34 | 1  | 11 | 4 | 39 | 2  |
| DNA recombination protein RmuC-like protein                           | BU251_00475 | 45 | 35 | 9  | 13 | 0 | 35 | 11 |
| electron transfer flavoprotein subunit beta                           | BU251_04020 | 28 | 33 | 3  | 17 | 6 | 33 | 3  |
| pantothenate kinase type III, CoaX-like                               | BU251_04745 | 28 | 40 | 11 | 14 | 9 | 30 | 1  |
| diadenylate cyclase spyDAC                                            | BU251_04895 | 29 | 34 | 6  | 13 | 3 | 36 | 3  |
| arginine--tRNA ligase                                                 | BU251_06000 | 63 | 35 | 23 | 8  | 4 | 40 | 1  |
| hypothetical protein                                                  | BU251_08420 | 32 | 42 | 18 | 9  | 5 | 32 | 14 |
| translation initiation factor IF-3                                    | BU251_09475 | 18 | 35 | 4  | 10 | 2 | 38 | 4  |
| [Fe] hydrogenase large subunit                                        | BU251_02020 | 68 | 36 | 23 | 10 | 0 | 36 | 14 |
| hypothetical protein                                                  | BU251_04835 | 76 | 32 | 25 | 12 | 7 | 38 | 1  |
| DNA-binding protein similar to integration host factor beta subunit   | BU251_04715 | 10 | 32 | 2  | 17 | 6 | 33 | 6  |
| orotate phosphoribosyltransferase                                     | BU251_06055 | 21 | 33 | 6  | 15 | 5 | 34 | 6  |
| protein arginine kinase                                               | BU251_06190 | 40 | 32 | 8  | 10 | 3 | 39 | 3  |
| 50S ribosomal protein L3                                              | BU251_03090 | 22 | 30 | 6  | 10 | 8 | 41 | 3  |
| cysteine synthase A                                                   | BU251_06615 | 33 | 25 | 10 | 15 | 6 | 41 | 13 |
| type II secretion system protein GspG                                 | BU251_08440 | 14 | 36 | 13 | 8  | 1 | 36 | 4  |
| glycosyl transferase                                                  | BU251_04300 | 31 | 38 | 9  | 11 | 1 | 31 | 7  |
| hypothetical protein                                                  | BU251_06665 | 30 | 14 | 0  | 20 | 7 | 46 | 1  |
| hypothetical protein                                                  | BU251_07475 | 34 | 36 | 1  | 9  | 2 | 36 | 2  |
| hypothetical protein                                                  | BU251_08095 | 73 | 34 | 19 | 10 | 1 | 36 | 10 |
| hypothetical protein                                                  | BU251_08400 | 53 | 33 | 1  | 14 | 0 | 33 | 5  |
| hypothetical protein                                                  | BU251_03725 | 41 | 30 | 18 | 12 | 4 | 38 | 1  |
| mannose-1-phosphate guanylyltransferase/mannose-6-phosphate isomerase | BU251_04425 | 55 | 36 | 26 | 8  | 1 | 36 | 14 |
| hypothetical protein                                                  | BU251_07910 | 55 | 31 | 17 | 14 | 3 | 34 | 18 |

|                                                                 |             |     |    |    |    |    |    |    |
|-----------------------------------------------------------------|-------------|-----|----|----|----|----|----|----|
| ATP-dependent RNA helicase DBP9                                 | BU251_05130 | 56  | 40 | 23 | 8  | 4  | 31 | 1  |
| hypothetical protein                                            | BU251_00550 | 39  | 35 | 16 | 13 | 1  | 30 | 4  |
| ribosome recycling factor                                       | BU251_00845 | 21  | 35 | 5  | 11 | 4  | 33 | 11 |
| hypothetical protein                                            | BU251_05215 | 22  | 32 | 4  | 14 | 1  | 32 | 13 |
| hypothetical protein                                            | BU251_07965 | 26  | 30 | 1  | 12 | 0  | 36 | 4  |
| nucleoside-diphosphate-sugar pyrophosphorylase                  | BU251_00885 | 30  | 30 | 11 | 15 | 5  | 33 | 10 |
| preprotein translocase subunit SecE                             | BU251_04055 | 15  | 37 | 10 | 9  | 3  | 32 | 1  |
| SMC-Scp complex subunit ScpB                                    | BU251_03925 | 27  | 31 | 8  | 11 | 4  | 36 | 6  |
| transaldolase                                                   | BU251_06585 | 42  | 35 | 0  | 14 | 2  | 29 | 5  |
| UDP-N-acetylglucosamine 3-dehydrogenase                         | BU251_00820 | 36  | 34 | 18 | 11 | 7  | 32 | 16 |
| lipid A biosynthesis lauroyl acyltransferase                    | BU251_00995 | 71  | 33 | 25 | 10 | 4  | 34 | 4  |
| hypothetical protein                                            | BU251_01120 | 13  | 36 | 4  | 10 | 1  | 31 | 12 |
| ribokinase                                                      | BU251_01555 | 33  | 33 | 4  | 9  | 2  | 36 | 1  |
| chemotaxis protein MotB                                         | BU251_01565 | 25  | 31 | 6  | 12 | 2  | 35 | 9  |
| nicotinate-nucleotide diphosphorylase<br>(carboxylating)        | BU251_04770 | 33  | 37 | 16 | 9  | 6  | 31 | 6  |
| hypothetical protein                                            | BU251_07105 | 45  | 34 | 4  | 9  | 1  | 34 | 1  |
| transketolase, C-terminal section                               | BU251_00595 | 33  | 31 | 11 | 13 | 1  | 32 | 7  |
| ATP-dependent DNA helicase UvrD/PcrA                            | BU251_06335 | 124 | 24 | 26 | 12 | 4  | 41 | 2  |
| NADH-cytochrome b5 reductase 1                                  | BU251_04630 | 27  | 30 | 7  | 16 | 3  | 29 | 1  |
| hypothetical protein                                            | BU251_05125 | 26  | 24 | 0  | 25 | 16 | 27 | 1  |
| threonylcarbamoyl-AMP synthase                                  | BU251_07220 | 38  | 29 | 2  | 13 | 1  | 34 | 13 |
| transketolase, N-terminal section                               | BU251_00590 | 31  | 36 | 6  | 7  | 4  | 32 | 1  |
| Type III restriction-modification system<br>methylation subunit | BU251_02840 | 65  | 37 | 23 | 6  | 1  | 31 | 1  |
| adenylate kinase                                                | BU251_03190 | 24  | 30 | 4  | 13 | 1  | 32 | 4  |
| malate dehydrogenase                                            | BU251_03260 | 31  | 29 | 7  | 13 | 4  | 33 | 1  |
| hypothetical protein                                            | BU251_03645 | 23  | 13 | 3  | 20 | 3  | 41 | 4  |
| hypothetical protein                                            | BU251_07410 | 51  | 34 | 1  | 13 | 3  | 27 | 1  |

|                                                                                   |             |    |    |    |    |   |    |    |
|-----------------------------------------------------------------------------------|-------------|----|----|----|----|---|----|----|
| acetyl-CoA carboxylase carboxyltransferase subunit alpha                          | BU251_07950 | 36 | 36 | 6  | 8  | 1 | 31 | 11 |
| hypothetical protein                                                              | BU251_01505 | 77 | 34 | 18 | 5  | 2 | 35 | 1  |
| efflux transporter, RND family, MFP subunit                                       | BU251_01855 | 35 | 35 | 5  | 8  | 4 | 31 | 3  |
| Holliday junction DNA helicase RuvA                                               | BU251_03930 | 25 | 35 | 3  | 10 | 1 | 29 | 5  |
| hypothetical protein                                                              | BU251_06910 | 40 | 30 | 6  | 13 | 0 | 31 | 2  |
| V-type ATP synthase subunit E                                                     | BU251_08240 | 22 | 34 | 2  | 11 | 4 | 30 | 4  |
| hypothetical protein                                                              | BU251_08395 | 25 | 30 | 3  | 11 | 4 | 33 | 8  |
| ribonucleoside-diphosphate reductase, adenosylcobalamin-dependent                 | BU251_07050 | 85 | 27 | 16 | 11 | 1 | 35 | 4  |
| hypothetical protein                                                              | BU251_01740 | 32 | 34 | 4  | 13 | 4 | 26 | 3  |
| glucose-1-phosphate adenyltransferase                                             | BU251_04035 | 46 | 31 | 11 | 12 | 1 | 31 | 1  |
| hypothetical protein                                                              | BU251_04985 | 19 | 31 | 25 | 6  | 0 | 36 | 15 |
| 6,7-dimethyl-8-ribityllumazine synthase                                           | BU251_05895 | 17 | 29 | 1  | 10 | 3 | 34 | 2  |
| glycosyl transferase family 2                                                     | BU251_00420 | 42 | 37 | 21 | 10 | 1 | 26 | 1  |
| hypothetical protein                                                              | BU251_06255 | 17 | 32 | 4  | 10 | 4 | 31 | 1  |
| magnesium-translocating P-type ATPase                                             | BU251_06040 | 95 | 28 | 6  | 9  | 4 | 35 | 10 |
| 1D-myo-inositol 2-acetamido-2-deoxy-alpha-D-glucopyranoside deacetylase           | BU251_06345 | 54 | 43 | 23 | 10 | 1 | 19 | 3  |
| hypothetical protein                                                              | BU251_07940 | 58 | 19 | 7  | 23 | 2 | 30 | 0  |
| bifunctional homocysteine S-methyltransferase/methylenetetrahydrofolate reductase | BU251_00970 | 67 | 30 | 10 | 9  | 6 | 32 | 2  |
| DNA repair protein RadA                                                           | BU251_06160 | 51 | 23 | 11 | 13 | 6 | 36 | 4  |
| hypothetical protein                                                              | BU251_05150 | 59 | 32 | 6  | 7  | 5 | 32 | 1  |
| crotonobetainyl-CoA--carnitine CoA-transferase                                    | BU251_02215 | 28 | 32 | 9  | 9  | 5 | 30 | 5  |
| galactose-1-phosphate uridylyltransferase                                         | BU251_04245 | 39 | 28 | 6  | 6  | 1 | 36 | 4  |
| primosomal protein N'                                                             | BU251_04260 | 72 | 30 | 28 | 6  | 4 | 33 | 3  |
| phosphoribosylaminoimidazolesuccinocarboxamide synthase                           | BU251_07670 | 33 | 31 | 4  | 11 | 0 | 27 | 4  |
| hypothetical protein                                                              | BU251_08070 | 36 | 30 | 9  | 11 | 5 | 29 | 6  |

|                                                                  |             |    |    |    |    |   |    |    |
|------------------------------------------------------------------|-------------|----|----|----|----|---|----|----|
| acetyl-CoA synthase corrinoid iron-sulfur protein, large subunit | BU251_04965 | 49 | 31 | 10 | 8  | 1 | 30 | 7  |
| diaminopimelate decarboxylase                                    | BU251_05310 | 47 | 32 | 12 | 10 | 1 | 27 | 10 |
| cell division/cell wall cluster transcriptional repressor MraZ   | BU251_05800 | 17 | 25 | 7  | 11 | 5 | 33 | 0  |
| cysteine--tRNA ligase                                            | BU251_06135 | 54 | 32 | 23 | 5  | 7 | 32 | 21 |
| hypothetical protein                                             | BU251_02950 | 48 | 22 | 1  | 11 | 0 | 35 | 1  |
| hypothetical protein                                             | BU251_03535 | 26 | 34 | 4  | 11 | 0 | 24 | 6  |
| RNA polymerase sigma factor RpoD                                 | BU251_04580 | 32 | 27 | 8  | 11 | 2 | 31 | 2  |
| hypothetical protein                                             | BU251_07625 | 53 | 30 | 1  | 10 | 7 | 28 | 3  |
| hypothetical protein                                             | BU251_07845 | 25 | 16 | 4  | 6  | 1 | 47 | 9  |
| hypothetical protein                                             | BU251_04220 | 16 | 32 | 1  | 8  | 2 | 29 | 6  |
| ATP-dependent DNA helicase RecG                                  | BU251_05470 | 79 | 26 | 23 | 8  | 6 | 35 | 4  |
| 3-phosphoshikimate 1-carboxyvinyltransferase                     | BU251_05670 | 47 | 27 | 8  | 12 | 6 | 29 | 4  |
| hypothetical protein                                             | BU251_06560 | 38 | 31 | 8  | 8  | 2 | 30 | 9  |
| hypothetical protein                                             | BU251_05265 | 9  | 23 | 10 | 14 | 3 | 30 | 11 |
| 3-isopropylmalate dehydratase                                    | BU251_03250 | 19 | 33 | 7  | 7  | 0 | 27 | 1  |
| cochaperone GroES (HSP10)                                        | BU251_04740 | 11 | 19 | 1  | 12 | 4 | 37 | 2  |
| hypothetical protein                                             | BU251_07840 | 34 | 26 | 0  | 11 | 1 | 30 | 1  |
| translation elongation factor Ts                                 | BU251_00835 | 20 | 34 | 1  | 5  | 1 | 28 | 6  |
| NADP-reducing hydrogenase HdnC                                   | BU251_02015 | 65 | 34 | 14 | 7  | 6 | 25 | 1  |
| hypothetical protein                                             | BU251_06400 | 14 | 29 | 4  | 10 | 2 | 28 | 6  |
| hypothetical protein                                             | BU251_04430 | 25 | 28 | 4  | 9  | 1 | 30 | 8  |
| pantoate--beta-alanine ligase                                    | BU251_05275 | 32 | 31 | 4  | 9  | 1 | 26 | 0  |
| ribulose-phosphate 3-epimerase                                   | BU251_05535 | 24 | 27 | 7  | 7  | 1 | 32 | 2  |
| V-type ATP synthase subunit B                                    | BU251_08225 | 48 | 28 | 7  | 12 | 5 | 26 | 3  |
| hypothetical protein                                             | BU251_07860 | 18 | 26 | 1  | 11 | 2 | 29 | 0  |
| formate--tetrahydrofolate ligase                                 | BU251_01265 | 60 | 25 | 9  | 13 | 2 | 28 | 4  |
| ribonuclease TTHA0252                                            | BU251_01455 | 55 | 25 | 21 | 8  | 4 | 32 | 0  |
| hypothetical protein                                             | BU251_04485 | 61 | 29 | 11 | 10 | 1 | 26 | 5  |



|                                                                                       |             |    |    |    |    |   |    |    |
|---------------------------------------------------------------------------------------|-------------|----|----|----|----|---|----|----|
| 16S rRNA (cytidine(1402)-2'-O)-methyltransferase                                      | BU251_08335 | 24 | 26 | 1  | 11 | 3 | 28 | 0  |
| phosphate--acyl-ACP acyltransferase                                                   | BU251_05420 | 36 | 25 | 3  | 8  | 1 | 31 | 3  |
| transporter, putative                                                                 | BU251_01905 | 94 | 27 | 6  | 11 | 5 | 26 | 4  |
| elongation factor 4                                                                   | BU251_03895 | 67 | 24 | 16 | 8  | 7 | 32 | 15 |
| UDP-N-acetylmuramoylalanyl-D-glutamyl-2, 6-diaminopimelate--D-alanyl-D-alanine ligase | BU251_05770 | 51 | 24 | 11 | 7  | 3 | 33 | 8  |
| GTP cyclohydrolase I FoIE                                                             | BU251_08015 | 21 | 31 | 1  | 2  | 2 | 31 | 14 |
| lipopolysaccharide heptosyltransferase II                                             | BU251_01020 | 77 | 19 | 9  | 10 | 4 | 35 | 5  |
| nicotinate phosphoribosyltransferase                                                  | BU251_03565 | 60 | 25 | 11 | 12 | 4 | 27 | 8  |
| 4-hydroxy-tetrahydrodipicolinate reductase                                            | BU251_05295 | 30 | 26 | 3  | 11 | 4 | 27 | 13 |
| magnesium and cobalt transport protein CorA                                           | BU251_06405 | 37 | 31 | 4  | 11 | 1 | 22 | 4  |
| phosphopantothenoylcysteine decarboxylase / Phosphopantothenoylcysteine synthetase    | BU251_04800 | 24 | 25 | 4  | 13 | 6 | 26 | 4  |
| elongation factor P                                                                   | BU251_03810 | 21 | 24 | 4  | 11 | 0 | 27 | 7  |
| NADH-ubiquinone oxidoreductase chain 49kDa                                            | BU251_04515 | 47 | 22 | 6  | 11 | 6 | 29 | 9  |
| hypothetical protein                                                                  | BU251_05820 | 35 | 30 | 17 | 8  | 3 | 24 | 8  |
| acetolactate synthase small subunit                                                   | BU251_00925 | 18 | 31 | 3  | 9  | 1 | 22 | 4  |
| thioredoxin-disulfide reductase                                                       | BU251_02120 | 34 | 29 | 4  | 7  | 3 | 25 | 13 |
| cytidylate kinase                                                                     | BU251_03900 | 25 | 23 | 5  | 10 | 3 | 29 | 6  |
| hypothetical protein                                                                  | BU251_07040 | 29 | 28 | 5  | 9  | 0 | 25 | 1  |
| 3-methyl-2-oxobutanoate dehydrogenase subunit VorB                                    | BU251_09375 | 39 | 25 | 11 | 11 | 3 | 25 | 7  |
| outer membrane vitamin B12 receptor BtuB                                              | BU251_00360 | 68 | 38 | 21 | 5  | 0 | 18 | 1  |
| expressed secreted protein of unknown function                                        | BU251_01030 | 9  | 29 | 7  | 11 | 1 | 21 | 0  |
| 4-hydroxy-3-methylbut-2-en-1-yl diphosphate synthase                                  | BU251_01155 | 39 | 23 | 8  | 9  | 2 | 30 | 1  |
| glucose-1-phosphate adenyltransferase                                                 | BU251_06835 | 47 | 22 | 8  | 11 | 3 | 28 | 6  |
| 3-deoxy-8-phosphooctulonate synthase                                                  | BU251_01055 | 30 | 28 | 8  | 8  | 4 | 25 | 2  |
| acetyl-CoA carboxylase subunit beta                                                   | BU251_02955 | 31 | 28 | 3  | 5  | 3 | 27 | 3  |
| hypothetical protein                                                                  | BU251_04445 | 28 | 28 | 4  | 8  | 0 | 25 | 1  |
| hypothetical protein                                                                  | BU251_04685 | 51 | 27 | 7  | 8  | 1 | 26 | 2  |

|                                                             |             |    |    |    |    |   |    |    |
|-------------------------------------------------------------|-------------|----|----|----|----|---|----|----|
| glutaminyl-tRNA synthase (glutamine-hydrolyzing) subunit B  | BU251_05010 | 53 | 28 | 16 | 7  | 0 | 25 | 4  |
| hypothetical protein                                        | BU251_08805 | 23 | 28 | 1  | 7  | 1 | 26 | 4  |
| hypothetical protein                                        | BU251_01790 | 25 | 26 | 2  | 8  | 2 | 27 | 6  |
| serine phosphatase RsbU, regulator of sigma subunit         | BU251_02685 | 29 | 23 | 6  | 10 | 4 | 27 | 6  |
| transcriptional regulator                                   | BU251_03330 | 20 | 32 | 2  | 2  | 3 | 26 | 2  |
| hypothetical protein                                        | BU251_01365 | 33 | 29 | 4  | 9  | 1 | 21 | 0  |
| chromosomal replication initiator protein DnaA              | BU251_00005 | 50 | 23 | 16 | 8  | 5 | 28 | 18 |
| hypothetical protein                                        | BU251_01690 | 39 | 14 | 0  | 11 | 6 | 34 | 8  |
| hypothetical protein                                        | BU251_02370 | 30 | 31 | 0  | 7  | 1 | 21 | 4  |
| hypothetical protein                                        | BU251_03955 | 27 | 31 | 11 | 3  | 1 | 25 | 2  |
| 2-oxoglutarate oxidoreductase, alpha subunit                | BU251_06595 | 63 | 25 | 11 | 5  | 2 | 29 | 10 |
| amidophosphoribosyltransferase                              | BU251_07240 | 53 | 22 | 8  | 8  | 1 | 28 | 10 |
| hypothetical protein                                        | BU251_08375 | 19 | 30 | 3  | 5  | 1 | 24 | 6  |
| aminoacyl-tRNA hydrolase                                    | BU251_00635 | 21 | 24 | 1  | 6  | 0 | 28 | 6  |
| 50S ribosomal protein L19                                   | BU251_01250 | 13 | 23 | 1  | 9  | 1 | 26 | 3  |
| lipoprotein-releasing system transmembrane protein LolC     | BU251_06210 | 43 | 24 | 12 | 8  | 1 | 27 | 13 |
| mechanosensitive ion channel protein MscS                   | BU251_03550 | 39 | 27 | 8  | 10 | 3 | 20 | 13 |
| 3-oxoacyl-ACP synthase                                      | BU251_05415 | 36 | 27 | 6  | 9  | 3 | 22 | 1  |
| metallophosphoesterase                                      | BU251_09400 | 30 | 26 | 6  | 6  | 0 | 26 | 1  |
| ABC transporter ATP-binding protein                         | BU251_02290 | 27 | 26 | 3  | 6  | 4 | 25 | 1  |
| homoserine O-acetyltransferase                              | BU251_06610 | 43 | 26 | 8  | 5  | 0 | 26 | 0  |
| 30S ribosomal protein S11                                   | BU251_03215 | 13 | 25 | 5  | 6  | 4 | 26 | 9  |
| acetyl-CoA decarboxylase/synthase complex subunit delta     | BU251_04950 | 35 | 24 | 5  | 6  | 3 | 27 | 9  |
| hypothetical protein                                        | BU251_07715 | 19 | 29 | 4  | 0  | 0 | 28 | 2  |
| 3-hydroxyacyl-[acyl-carrier-protein] dehydratase, FabZ form | BU251_03300 | 16 | 28 | 0  | 8  | 5 | 20 | 1  |
| L-Aspartate dehydrogenase                                   | BU251_05270 | 28 | 26 | 7  | 6  | 3 | 24 | 1  |

|                                                                            |             |     |    |    |    |   |    |    |
|----------------------------------------------------------------------------|-------------|-----|----|----|----|---|----|----|
| hypothetical protein                                                       | BU251_06705 | 43  | 21 | 5  | 9  | 0 | 26 | 2  |
| glutamate 5-kinase                                                         | BU251_05550 | 38  | 18 | 6  | 9  | 1 | 28 | 8  |
| electron transport complex protein RnfG                                    | BU251_07565 | 21  | 24 | 8  | 4  | 6 | 27 | 7  |
| polysaccharide biosynthesis protein vipB/tviC                              | BU251_00400 | 35  | 27 | 8  | 5  | 3 | 22 | 4  |
| hypothetical protein                                                       | BU251_01540 | 15  | 21 | 1  | 8  | 1 | 26 | 5  |
| outer membrane lipoprotein-sorting protein                                 | BU251_01910 | 30  | 25 | 4  | 8  | 2 | 22 | 5  |
| ADP-heptose--lipooligosaccharide<br>heptosyltransferase II                 | BU251_04280 | 42  | 24 | 7  | 7  | 1 | 23 | 7  |
| redox-sensing transcriptional repressor Rex                                | BU251_02000 | 24  | 23 | 8  | 9  | 4 | 23 | 2  |
| hypothetical protein                                                       | BU251_03905 | 30  | 24 | 7  | 9  | 0 | 21 | 2  |
| cell division protein FtsA                                                 | BU251_05720 | 46  | 20 | 4  | 7  | 6 | 27 | 1  |
| hypothetical protein                                                       | BU251_09120 | 24  | 17 | 6  | 9  | 0 | 28 | 6  |
| acyl-[acyl-carrier-protein]--UDP-N-<br>acetylglucosamine O-acyltransferase | BU251_00685 | 27  | 22 | 12 | 8  | 1 | 24 | 8  |
| type II secretion system protein F                                         | BU251_05195 | 46  | 23 | 8  | 5  | 3 | 25 | 10 |
| beta-ketoacyl-[acyl-carrier-protein] synthase II                           | BU251_05395 | 44  | 1  | 1  | 10 | 0 | 42 | 6  |
| DNA-binding response regulator                                             | BU251_06710 | 26  | 23 | 0  | 7  | 4 | 24 | 4  |
| aromatic amino acid aminotransferase                                       | BU251_06850 | 43  | 22 | 4  | 6  | 1 | 26 | 8  |
| hydroxyacid dehydrogenase                                                  | BU251_07285 | 39  | 26 | 8  | 7  | 4 | 21 | 1  |
| preprotein translocase subunit YajC                                        | BU251_05050 | 10  | 27 | 5  | 6  | 1 | 20 | 1  |
| lipid-A-disaccharide synthase                                              | BU251_00815 | 43  | 25 | 16 | 5  | 1 | 23 | 2  |
| ABC transporter ATP-binding protein                                        | BU251_06175 | 28  | 20 | 1  | 12 | 1 | 21 | 3  |
| hypothetical protein                                                       | BU251_06330 | 108 | 19 | 18 | 6  | 2 | 28 | 2  |
| hypothetical protein                                                       | BU251_07075 | 16  | 27 | 3  | 7  | 1 | 18 | 4  |
| hypothetical protein                                                       | BU251_07945 | 21  | 24 | 6  | 6  | 1 | 23 | 8  |
| putative ABC transporter ATP-binding protein YdiF                          | BU251_01950 | 73  | 19 | 15 | 4  | 5 | 30 | 4  |
| molecular chaperone DnaJ                                                   | BU251_02935 | 42  | 21 | 8  | 6  | 0 | 25 | 2  |
| 50S ribosomal protein L22                                                  | BU251_03115 | 15  | 21 | 6  | 9  | 4 | 23 | 5  |
| phosphomethylpyrimidine synthase                                           | BU251_03760 | 48  | 19 | 6  | 8  | 1 | 25 | 8  |
| hypothetical protein                                                       | BU251_00385 | 23  | 23 | 7  | 8  | 2 | 21 | 1  |

|                                                                                                 |             |    |    |    |    |   |    |   |
|-------------------------------------------------------------------------------------------------|-------------|----|----|----|----|---|----|---|
| carbon monoxide dehydrogenase medium chain                                                      | BU251_01515 | 30 | 22 | 4  | 6  | 4 | 24 | 4 |
| type II 3-dehydroquinone dehydratase                                                            | BU251_03820 | 16 | 22 | 1  | 9  | 2 | 21 | 3 |
| leuD                                                                                            | BU251_05385 | 19 | 18 | 1  | 9  | 1 | 24 | 0 |
| cell division protein FtsI [Peptidoglycan synthetase]                                           | BU251_05780 | 63 | 20 | 6  | 6  | 0 | 25 | 4 |
| hypothetical protein                                                                            | BU251_08405 | 28 | 26 | 1  | 7  | 4 | 19 | 4 |
| hypothetical protein                                                                            | BU251_00275 | 46 | 17 | 11 | 14 | 8 | 20 | 4 |
| 3-deoxy-D-manno-octulosonate<br>cytidyltransferase                                              | BU251_01050 | 28 | 23 | 7  | 5  | 0 | 23 | 2 |
| N-acetylmuramoyl-L-alanine amidase                                                              | BU251_01595 | 39 | 22 | 4  | 8  | 2 | 21 | 0 |
| GDP-L-fucose synthetase                                                                         | BU251_02230 | 36 | 22 | 7  | 8  | 2 | 21 | 3 |
| transcriptional regulatory protein                                                              | BU251_03600 | 15 | 20 | 1  | 7  | 6 | 24 | 1 |
| FOF1 ATP synthase subunit alpha                                                                 | BU251_08480 | 55 | 19 | 8  | 11 | 1 | 21 | 8 |
| sensory box/GGDEF family protein                                                                | BU251_08500 | 33 | 22 | 7  | 9  | 2 | 20 | 0 |
| gatA                                                                                            | BU251_05015 | 52 | 22 | 11 | 9  | 4 | 20 | 8 |
| lipoprotein-releasing system ATP-binding<br>proteinLoID                                         | BU251_06205 | 25 | 21 | 3  | 6  | 1 | 23 | 6 |
| hypothetical protein                                                                            | BU251_05000 | 33 | 27 | 13 | 4  | 2 | 20 | 1 |
| hypothetical protein                                                                            | BU251_06025 | 29 | 21 | 4  | 10 | 1 | 19 | 1 |
| monogalactosyldiacylglycerol synthase                                                           | BU251_04265 | 41 | 22 | 9  | 6  | 3 | 22 | 1 |
| glycine dehydrogenase (aminomethyl-transferring)                                                | BU251_07320 | 49 | 20 | 7  | 6  | 2 | 24 | 5 |
| hypothetical protein                                                                            | BU251_07895 | 36 | 23 | 8  | 5  | 1 | 22 | 8 |
| methylenetetrahydrofolate dehydrogenase<br>(NADP+) / methenyltetrahydrofolate<br>cyclohydrolase | BU251_01275 | 32 | 22 | 10 | 7  | 3 | 20 | 8 |
| hypothetical protein                                                                            | BU251_01500 | 21 | 20 | 1  | 5  | 3 | 24 | 1 |
| superoxide reductase                                                                            | BU251_01930 | 15 | 24 | 1  | 6  | 1 | 20 | 1 |
| hypothetical protein                                                                            | BU251_02385 | 26 | 17 | 2  | 9  | 5 | 24 | 1 |
| 50S ribosomal protein L7/L12                                                                    | BU251_03050 | 13 | 17 | 1  | 10 | 1 | 22 | 4 |
| DNA-binding response regulator                                                                  | BU251_08535 | 36 | 17 | 1  | 8  | 1 | 25 | 6 |
| hypothetical protein                                                                            | BU251_01390 | 11 | 20 | 3  | 9  | 1 | 19 | 4 |
| Na(+)/H(+) antiporter NhaA 2                                                                    | BU251_01820 | 27 | 21 | 11 | 4  | 0 | 24 | 1 |

|                                                                          |             |    |    |    |    |   |    |    |
|--------------------------------------------------------------------------|-------------|----|----|----|----|---|----|----|
| 30S ribosomal protein S8                                                 | BU251_03160 | 15 | 21 | 1  | 8  | 2 | 20 | 1  |
| acetyl-CoA carboxylase, biotin carboxyl carrier protein                  | BU251_03805 | 18 | 20 | 3  | 7  | 2 | 22 | 4  |
| diaminopimelate epimerase                                                | BU251_05305 | 30 | 23 | 4  | 8  | 6 | 18 | 0  |
| [acyl-carrier-protein] S-malonyltransferase                              | BU251_05410 | 32 | 25 | 1  | 4  | 0 | 20 | 1  |
| 3-oxoacyl-[acyl-carrier-protein] reductase                               | BU251_03290 | 28 | 21 | 6  | 5  | 3 | 22 | 2  |
| glutamate synthase (NADPH), homotetrameric                               | BU251_01725 | 51 | 15 | 2  | 6  | 1 | 27 | 2  |
| Holliday junction branch migration DNA helicase RuvB                     | BU251_01200 | 38 | 19 | 2  | 6  | 1 | 23 | 8  |
| YggS family pyridoxal phosphate enzyme                                   | BU251_05715 | 26 | 15 | 3  | 11 | 2 | 21 | 6  |
| hypothetical protein                                                     | BU251_07930 | 36 | 21 | 6  | 4  | 6 | 22 | 4  |
| anthranilate/aminodeoxychorismate synthase component II                  | BU251_01340 | 21 | 20 | 6  | 5  | 0 | 21 | 4  |
| hypothetical protein                                                     | BU251_03625 | 12 | 17 | 4  | 8  | 4 | 22 | 3  |
| dihydropteroate synthase                                                 | BU251_04900 | 43 | 19 | 10 | 3  | 0 | 24 | 16 |
| nickel responsive regulator                                              | BU251_07710 | 16 | 20 | 0  | 9  | 2 | 18 | 2  |
| hypothetical protein                                                     | BU251_07915 | 53 | 6  | 1  | 9  | 3 | 31 | 0  |
| hypothetical protein                                                     | BU251_02485 | 26 | 19 | 4  | 7  | 1 | 20 | 4  |
| 5-methyltetrahydrofolate:corrinoid iron-sulfur protein methyltransferase | BU251_04945 | 29 | 21 | 4  | 6  | 3 | 19 | 6  |
| 2'-5' RNA ligase                                                         | BU251_05910 | 21 | 23 | 4  | 3  | 0 | 20 | 7  |
| tryptophan synthase subunit alpha                                        | BU251_06015 | 29 | 21 | 4  | 8  | 2 | 18 | 4  |
| S-methyl-5-thioribose-1-phosphate isomerase                              | BU251_06100 | 39 | 21 | 8  | 6  | 4 | 19 | 1  |
| hydroxylamine reductase                                                  | BU251_06240 | 47 | 16 | 1  | 9  | 3 | 21 | 6  |
| hypothetical protein                                                     | BU251_08715 | 12 | 23 | 0  | 5  | 1 | 18 | 2  |
| cell division protein FtsQ                                               | BU251_05725 | 32 | 21 | 2  | 7  | 3 | 18 | 2  |
| methionine--tRNA ligase                                                  | BU251_06115 | 57 | 21 | 9  | 4  | 6 | 21 | 8  |
| DNA polymerase III subunits gamma and tau                                | BU251_06525 | 61 | 14 | 9  | 3  | 1 | 29 | 4  |
| Phosphoenolpyruvate carboxykinase (ATP)                                  | BU251_07535 | 29 | 22 | 1  | 8  | 0 | 16 | 2  |
| hypothetical protein                                                     | BU251_00250 | 39 | 21 | 8  | 4  | 2 | 20 | 4  |
| outer membrane efflux protein                                            | BU251_01850 | 46 | 21 | 4  | 4  | 1 | 20 | 7  |

|                                                    |             |    |    |    |    |   |    |    |
|----------------------------------------------------|-------------|----|----|----|----|---|----|----|
| hypothetical protein                               | BU251_06010 | 49 | 21 | 8  | 6  | 4 | 18 | 7  |
| hypothetical protein                               | BU251_08415 | 23 | 19 | 12 | 3  | 4 | 23 | 6  |
| hypothetical protein                               | BU251_08725 | 39 | 17 | 8  | 8  | 2 | 20 | 6  |
| hypothetical protein                               | BU251_00695 | 10 | 12 | 7  | 10 | 4 | 23 | 13 |
| glycosyl transferase                               | BU251_01005 | 40 | 17 | 8  | 7  | 3 | 20 | 3  |
| 3-isopropylmalate dehydratase large subunit        | BU251_03240 | 45 | 18 | 7  | 8  | 1 | 18 | 3  |
| DNA polymerase                                     | BU251_04655 | 26 | 17 | 1  | 7  | 5 | 21 | 8  |
| peptide chain release factor 1                     | BU251_01325 | 40 | 14 | 2  | 4  | 3 | 26 | 0  |
| 30S ribosomal protein S13                          | BU251_03210 | 15 | 19 | 0  | 7  | 2 | 18 | 1  |
| hypothetical protein                               | BU251_06290 | 42 | 20 | 1  | 6  | 2 | 18 | 3  |
| hypothetical protein                               | BU251_07430 | 25 | 19 | 4  | 7  | 4 | 19 | 1  |
| RIP metalloprotease RseP                           | BU251_01150 | 40 | 19 | 5  | 7  | 4 | 18 | 5  |
| hypothetical protein                               | BU251_01840 | 28 | 19 | 5  | 6  | 1 | 19 | 0  |
| radical SAM domain heme biosynthesis protein       | BU251_05185 | 37 | 16 | 6  | 8  | 4 | 19 | 1  |
| hypothetical protein                               | BU251_07190 | 16 | 19 | 1  | 6  | 1 | 18 | 3  |
| glycine cleavage system protein T                  | BU251_07310 | 40 | 20 | 4  | 4  | 1 | 20 | 1  |
| methionine biosynthesis protein MetW               | BU251_06605 | 23 | 19 | 3  | 6  | 1 | 18 | 6  |
| hypothetical protein                               | BU251_08360 | 30 | 21 | 1  | 4  | 0 | 18 | 1  |
| undecaprenyl-diphosphatase                         | BU251_03640 | 28 | 22 | 8  | 6  | 5 | 15 | 7  |
| lipopolysaccharide biosynthesis protein RfbH       | BU251_04390 | 50 | 21 | 15 | 4  | 2 | 18 | 0  |
| 4-hydroxythreonine-4-phosphate dehydrogenase PdxA  | BU251_05030 | 34 | 19 | 8  | 4  | 1 | 20 | 1  |
| imidazole glycerol phosphate synthase subunit HisH | BU251_05080 | 23 | 20 | 1  | 6  | 5 | 17 | 4  |
| response regulator MprA                            | BU251_06275 | 34 | 26 | 2  | 2  | 2 | 15 | 8  |
| tryptophanyl-tRNA synthetase                       | BU251_01190 | 37 | 19 | 1  | 7  | 1 | 16 | 1  |
| thioredoxin                                        | BU251_02095 | 12 | 16 | 4  | 9  | 1 | 17 | 1  |
| hypothetical protein                               | BU251_03355 | 36 | 18 | 4  | 5  | 4 | 20 | 8  |
| NAD(P)H-hydrate dehydratase                        | BU251_04880 | 30 | 17 | 2  | 9  | 2 | 17 | 4  |
| tRNA lysidine(34) synthetase TilS                  | BU251_04910 | 38 | 18 | 12 | 6  | 2 | 19 | 4  |

|                                                                                    |             |    |    |    |   |   |    |    |
|------------------------------------------------------------------------------------|-------------|----|----|----|---|---|----|----|
| hypothetical protein                                                               | BU251_07085 | 37 | 18 | 6  | 5 | 1 | 19 | 1  |
| 50S ribosomal protein L9                                                           | BU251_00655 | 17 | 17 | 1  | 7 | 1 | 18 | 1  |
| endo-1,4-beta-xylanase C                                                           | BU251_02260 | 49 | 16 | 6  | 4 | 3 | 22 | 2  |
| DNA-binding response regulator                                                     | BU251_02795 | 26 | 18 | 1  | 7 | 3 | 16 | 3  |
| hypothetical protein                                                               | BU251_02890 | 30 | 17 | 0  | 7 | 1 | 18 | 5  |
| hypothetical protein                                                               | BU251_04230 | 18 | 19 | 6  | 7 | 3 | 15 | 1  |
| hypothetical protein                                                               | BU251_05590 | 21 | 19 | 3  | 5 | 0 | 17 | 1  |
| hypothetical protein                                                               | BU251_06725 | 34 | 19 | 1  | 5 | 2 | 18 | 3  |
| glycine dehydrogenase (aminomethyl-transferring)                                   | BU251_07325 | 53 | 19 | 10 | 5 | 1 | 18 | 5  |
| phosphoribosylglycinamide formyltransferase                                        | BU251_07540 | 23 | 20 | 6  | 6 | 3 | 16 | 8  |
| hypothetical protein                                                               | BU251_04440 | 41 | 14 | 3  | 6 | 2 | 21 | 6  |
| 16S rRNA (cytosine(1402)-N(4))-methyltransferase                                   | BU251_05790 | 34 | 17 | 8  | 4 | 1 | 20 | 5  |
| bifunctional pyr operon transcriptional regulator/uracil phosphoribosyltransferase | BU251_08320 | 20 | 19 | 1  | 2 | 0 | 20 | 13 |
| thiol:disulfide oxidoreductase related to ResA                                     | BU251_00515 | 19 | 18 | 1  | 7 | 1 | 16 | 5  |
| peptidoglycan D,D-transpeptidase MrdA                                              | BU251_05650 | 62 | 20 | 8  | 4 | 2 | 17 | 1  |
| ribosome-binding factor A                                                          | BU251_05825 | 16 | 17 | 1  | 5 | 2 | 19 | 1  |
| hypothetical protein                                                               | BU251_08425 | 32 | 20 | 5  | 7 | 1 | 14 | 2  |
| hypothetical protein                                                               | BU251_00605 | 16 | 20 | 2  | 4 | 0 | 16 | 3  |
| UDP-glucose 4-epimerase                                                            | BU251_02205 | 37 | 17 | 4  | 8 | 2 | 15 | 6  |
| hypothetical protein                                                               | BU251_03480 | 18 | 17 | 7  | 3 | 4 | 20 | 4  |
| rod shape-determining protein MreC                                                 | BU251_05660 | 29 | 17 | 2  | 6 | 1 | 18 | 2  |
| hypothetical protein                                                               | BU251_01285 | 31 | 17 | 1  | 6 | 1 | 17 | 2  |
| hypothetical protein                                                               | BU251_02980 | 37 | 18 | 10 | 3 | 4 | 19 | 1  |
| type IV fimbrial assembly, ATPase PiIB                                             | BU251_03970 | 34 | 19 | 8  | 6 | 2 | 15 | 8  |
| hypothetical protein                                                               | BU251_05965 | 26 | 18 | 3  | 4 | 1 | 17 | 7  |
| hypothetical protein                                                               | BU251_06425 | 20 | 18 | 0  | 0 | 0 | 21 | 7  |
| ADP-ribose pyrophosphatase                                                         | BU251_07180 | 30 | 19 | 8  | 6 | 2 | 15 | 5  |
| hypothetical protein                                                               | BU251_07880 | 44 | 14 | 3  | 1 | 1 | 24 | 7  |

|                                                       |             |     |    |    |   |   |    |    |
|-------------------------------------------------------|-------------|-----|----|----|---|---|----|----|
| hypothetical protein                                  | BU251_08585 | 27  | 17 | 4  | 4 | 3 | 19 | 6  |
| hypothetical protein                                  | BU251_09055 | 18  | 18 | 1  | 3 | 4 | 19 | 6  |
| iron-sulfur cluster-binding protein                   | BU251_02155 | 42  | 17 | 11 | 6 | 0 | 16 | 1  |
| 50S ribosomal protein L15                             | BU251_03180 | 17  | 16 | 1  | 7 | 0 | 16 | 4  |
| peptidoglycan-N-acetylglucosamine deacetylase         | BU251_06355 | 29  | 18 | 11 | 6 | 1 | 15 | 7  |
| peptidylprolyl isomerase                              | BU251_00430 | 20  | 14 | 2  | 8 | 1 | 17 | 5  |
| hypothetical protein                                  | BU251_03395 | 105 | 20 | 2  | 0 | 0 | 19 | 1  |
| Rossmann fold protein, TIGR00730 family               | BU251_07250 | 24  | 15 | 4  | 8 | 2 | 16 | 1  |
| glycosyl transferase family 1                         | BU251_03530 | 45  | 15 | 5  | 7 | 4 | 17 | 5  |
| hypothetical protein                                  | BU251_03815 | 39  | 19 | 4  | 2 | 3 | 17 | 2  |
| glucose-1-phosphate cytidyltransferase                | BU251_04380 | 32  | 18 | 7  | 4 | 1 | 16 | 4  |
| GDP-fucose synthetase                                 | BU251_04415 | 37  | 15 | 4  | 6 | 1 | 17 | 10 |
| DNA polymerase III subunit alpha                      | BU251_04720 | 129 | 12 | 17 | 6 | 8 | 20 | 10 |
| dTMP kinase                                           | BU251_06130 | 25  | 15 | 4  | 7 | 0 | 16 | 5  |
| orotidine 5'-phosphate decarboxylase                  | BU251_08245 | 26  | 16 | 1  | 5 | 1 | 17 | 3  |
| ferrous iron transporter B                            | BU251_00305 | 64  | 14 | 13 | 9 | 1 | 15 | 2  |
| hypothetical protein                                  | BU251_05035 | 35  | 17 | 1  | 6 | 1 | 15 | 0  |
| hypothetical protein                                  | BU251_05120 | 30  | 7  | 1  | 6 | 1 | 24 | 3  |
| dihydroorotate dehydrogenase B catalytic subunit      | BU251_08250 | 33  | 15 | 6  | 5 | 6 | 18 | 8  |
| pyruvate kinase                                       | BU251_01215 | 38  | 17 | 6  | 4 | 2 | 17 | 4  |
| HIT family hydrolase                                  | BU251_03735 | 18  | 15 | 4  | 4 | 2 | 19 | 1  |
| hypothetical protein                                  | BU251_04435 | 32  | 20 | 5  | 3 | 4 | 15 | 6  |
| putative nickel insertion protein                     | BU251_04970 | 42  | 17 | 3  | 0 | 0 | 20 | 1  |
| 50S ribosomal protein L13                             | BU251_05355 | 19  | 16 | 4  | 6 | 0 | 15 | 1  |
| protein containing Prepilin-type cleavage/methylation | BU251_05475 | 14  | 16 | 2  | 6 | 1 | 15 | 4  |
| carboxynorspermidine decarboxylase                    | BU251_06230 | 41  | 14 | 11 | 6 | 0 | 16 | 6  |
| phosphopantetheine adenylyltransferase                | BU251_06265 | 21  | 18 | 4  | 5 | 1 | 14 | 1  |
| hypothetical protein                                  | BU251_07405 | 47  | 11 | 8  | 4 | 0 | 21 | 4  |
| hypothetical protein                                  | BU251_01025 | 8   | 15 | 1  | 8 | 1 | 13 | 1  |



|                                                                   |             |    |    |    |   |   |    |    |
|-------------------------------------------------------------------|-------------|----|----|----|---|---|----|----|
| ferredoxin-NADP reductase                                         | BU251_01720 | 30 | 15 | 6  | 5 | 1 | 17 | 1  |
| tRNA (adenosine(37)-N6)-<br>dimethylallyltransferaseMiaA          | BU251_02895 | 39 | 19 | 8  | 4 | 1 | 13 | 3  |
| hypothetical protein                                              | BU251_07095 | 51 | 20 | 1  | 2 | 3 | 14 | 13 |
| Type IV pilin PilA                                                | BU251_03450 | 15 | 19 | 1  | 4 | 1 | 13 | 3  |
| hypothetical protein                                              | BU251_04225 | 16 | 18 | 4  | 4 | 1 | 14 | 2  |
| nicotinate-nucleotide adenylyltransferase                         | BU251_05540 | 22 | 17 | 2  | 3 | 1 | 16 | 0  |
| hypothetical protein                                              | BU251_01915 | 50 | 20 | 1  | 1 | 1 | 14 | 1  |
| hypothetical protein                                              | BU251_04315 | 53 | 16 | 7  | 3 | 4 | 16 | 3  |
| response regulator                                                | BU251_04845 | 14 | 17 | 4  | 3 | 4 | 15 | 1  |
| GTPase Era                                                        | BU251_08080 | 33 | 15 | 4  | 5 | 2 | 16 | 5  |
| hypothetical protein                                              | BU251_08290 | 48 | 19 | 8  | 4 | 2 | 12 | 0  |
| AAA family ATPase                                                 | BU251_09425 | 55 | 12 | 7  | 4 | 1 | 19 | 8  |
| hypothetical protein                                              | BU251_00440 | 29 | 15 | 1  | 4 | 1 | 16 | 1  |
| hypothetical protein                                              | BU251_01475 | 22 | 14 | 6  | 5 | 0 | 15 | 7  |
| glycosyltransferase                                               | BU251_04385 | 37 | 13 | 6  | 6 | 0 | 15 | 4  |
| protein containing Prepilin-type<br>cleavage/methylation          | BU251_06380 | 24 | 19 | 3  | 3 | 0 | 12 | 0  |
| apolipoprotein N-acyltransferase                                  | BU251_07110 | 56 | 17 | 5  | 5 | 7 | 13 | 1  |
| hypothetical protein                                              | BU251_07700 | 26 | 17 | 2  | 4 | 5 | 14 | 0  |
| dihydrolipoamide dehydrogenase of 2-<br>oxoglutaratedehydrogenase | BU251_03265 | 46 | 14 | 4  | 4 | 2 | 17 | 1  |
| undecaprenyl-phosphate glucose<br>phosphotransferase              | BU251_04400 | 55 | 17 | 10 | 6 | 1 | 11 | 6  |
| LPS export ABC transporter permease LptG                          | BU251_06070 | 42 | 16 | 3  | 5 | 1 | 13 | 1  |
| stage 0 sporulation protein                                       | BU251_06120 | 29 | 17 | 5  | 4 | 1 | 14 | 1  |
| hypothetical protein                                              | BU251_01665 | 40 | 14 | 2  | 4 | 1 | 16 | 2  |
| hypothetical protein                                              | BU251_02325 | 12 | 14 | 1  | 7 | 2 | 13 | 3  |
| cofactor-independent phosphoglycerate mutase                      | BU251_04795 | 44 | 10 | 3  | 3 | 4 | 20 | 6  |
| pyridoxine 5'-phosphate synthase                                  | BU251_04890 | 27 | 16 | 5  | 2 | 2 | 16 | 4  |
| transcription-repair coupling factor                              | BU251_05040 | 71 | 12 | 17 | 0 | 0 | 21 | 3  |

|                                                       |             |    |    |    |   |   |    |    |
|-------------------------------------------------------|-------------|----|----|----|---|---|----|----|
| sulfur reduction protein DsrE                         | BU251_08695 | 12 | 15 | 1  | 6 | 5 | 13 | 0  |
| 3-deoxy-D-manno-octulosonate 8-phosphate phosphatase  | BU251_01065 | 21 | 17 | 4  | 4 | 0 | 12 | 6  |
| hypothetical protein                                  | BU251_04635 | 37 | 15 | 6  | 4 | 2 | 14 | 8  |
| 30S ribosomal protein S9                              | BU251_05350 | 15 | 13 | 2  | 6 | 3 | 14 | 0  |
| pyrroline-5-carboxylate reductase                     | BU251_05710 | 30 | 14 | 1  | 6 | 5 | 14 | 4  |
| thiamine-phosphate kinase                             | BU251_06095 | 33 | 16 | 4  | 3 | 1 | 14 | 1  |
| 2-C-methyl-D-erythritol 2,4-cyclodiphosphate synthase | BU251_06145 | 18 | 15 | 1  | 6 | 2 | 13 | 2  |
| hypothetical protein                                  | BU251_07060 | 24 | 14 | 4  | 8 | 2 | 12 | 1  |
| hypothetical protein                                  | BU251_07485 | 24 | 11 | 2  | 6 | 3 | 16 | 1  |
| hypothetical protein                                  | BU251_00260 | 29 | 4  | 1  | 4 | 1 | 24 | 3  |
| glycosyltransferase                                   | BU251_02200 | 25 | 14 | 4  | 4 | 1 | 15 | 6  |
| 2-oxoacid ferredoxin oxidoreductase beta subunit      | BU251_06590 | 31 | 13 | 2  | 5 | 1 | 15 | 1  |
| hypothetical protein                                  | BU251_07035 | 32 | 19 | 9  | 3 | 0 | 11 | 1  |
| hypothetical protein                                  | BU251_09100 | 28 | 13 | 5  | 1 | 1 | 19 | 16 |
| hypothetical protein                                  | BU251_01445 | 19 | 15 | 1  | 5 | 0 | 12 | 2  |
| cation-binding protein                                | BU251_01940 | 21 | 16 | 8  | 3 | 1 | 13 | 10 |
| two-component hybrid sensor and regulator             | BU251_02040 | 14 | 8  | 1  | 5 | 4 | 20 | 4  |
| glycosyl transferase                                  | BU251_04405 | 47 | 14 | 5  | 4 | 1 | 15 | 6  |
| hypothetical protein                                  | BU251_07680 | 17 | 13 | 2  | 6 | 2 | 14 | 1  |
| hypothetical protein                                  | BU251_08185 | 52 | 18 | 7  | 0 | 0 | 14 | 2  |
| carbamoyl phosphate synthase small subunit            | BU251_08280 | 41 | 10 | 0  | 5 | 0 | 17 | 6  |
| hypothetical protein                                  | BU251_02180 | 13 | 13 | 18 | 4 | 6 | 15 | 4  |
| hypothetical protein                                  | BU251_03795 | 13 | 16 | 4  | 1 | 1 | 15 | 2  |
| thiamine biosynthesis lipoprotein ApbE                | BU251_04615 | 35 | 14 | 4  | 4 | 3 | 14 | 2  |
| V-type ATP synthase subunit I                         | BU251_08210 | 65 | 12 | 10 | 6 | 8 | 14 | 1  |
| quinolinate synthase                                  | BU251_00375 | 34 | 12 | 1  | 4 | 1 | 15 | 3  |
| tetraacyldisaccharide 4'-kinase                       | BU251_00990 | 39 | 16 | 8  | 4 | 3 | 11 | 7  |
| indole-3-glycerol phosphate synthase                  | BU251_01350 | 29 | 13 | 4  | 4 | 2 | 15 | 1  |

|                                                             |             |    |    |    |   |   |    |   |
|-------------------------------------------------------------|-------------|----|----|----|---|---|----|---|
| adenosine monophosphate-protein transferase<br>SoFic        | BU251_01735 | 43 | 15 | 10 | 3 | 1 | 13 | 0 |
| hypothetical protein                                        | BU251_06935 | 29 | 14 | 1  | 4 | 1 | 13 | 0 |
| radical SAM protein                                         | BU251_00570 | 32 | 13 | 1  | 2 | 2 | 16 | 0 |
| shikimate dehydrogenase                                     | BU251_00940 | 28 | 15 | 4  | 3 | 1 | 13 | 1 |
| geranylgeranyl diphosphate synthase                         | BU251_01585 | 40 | 16 | 8  | 1 | 1 | 13 | 6 |
| hypothetical protein                                        | BU251_02330 | 28 | 13 | 4  | 4 | 0 | 13 | 6 |
| rRNA small subunit methyltransferase E                      | BU251_05140 | 27 | 13 | 2  | 4 | 1 | 13 | 7 |
| 50S ribosomal protein L21                                   | BU251_05560 | 11 | 13 | 0  | 6 | 4 | 11 | 3 |
| hypothetical protein                                        | BU251_08010 | 15 | 16 | 1  | 5 | 1 | 9  | 0 |
| 4-(cytidine 5'-diphospho)-2-C-methyl-D-erythritol<br>kinase | BU251_00600 | 34 | 13 | 6  | 4 | 1 | 12 | 1 |
| thiamin-phosphate pyrophosphorylase                         | BU251_03770 | 17 | 13 | 1  | 4 | 1 | 12 | 3 |
| hypothetical protein                                        | BU251_05165 | 18 | 13 | 5  | 4 | 2 | 13 | 1 |
| methylenetetrahydrofolate dehydrogenase                     | BU251_00215 | 51 | 15 | 0  | 2 | 2 | 12 | 1 |
| hypothetical protein                                        | BU251_02700 | 14 | 14 | 5  | 3 | 1 | 13 | 2 |
| hypothetical protein                                        | BU251_08520 | 44 | 11 | 3  | 4 | 1 | 14 | 1 |
| site-specific tyrosine recombinase XerD                     | BU251_05840 | 34 | 15 | 8  | 3 | 1 | 11 | 6 |
| transketolase, C-terminal section                           | BU251_02225 | 33 | 9  | 3  | 6 | 1 | 13 | 3 |
| 3-oxoacyl-[acyl-carrier-protein] synthase, KASII            | BU251_03305 | 45 | 11 | 2  | 3 | 4 | 15 | 1 |
| 30S ribosomal protein S16                                   | BU251_05055 | 9  | 10 | 1  | 7 | 0 | 11 | 4 |
| ATP-dependent permease AUS1                                 | BU251_06085 | 20 | 12 | 3  | 3 | 1 | 13 | 1 |
| hypothetical protein                                        | BU251_08555 | 10 | 15 | 4  | 3 | 1 | 10 | 2 |
| 2-oxoglutarate ferredoxin oxidoreductase<br>subunitgamma    | BU251_09365 | 18 | 16 | 1  | 0 | 0 | 12 | 1 |
| hypothetical protein                                        | BU251_00280 | 36 | 12 | 1  | 4 | 1 | 12 | 1 |
| anthranilate phosphoribosyltransferase                      | BU251_01345 | 36 | 12 | 4  | 1 | 1 | 14 | 4 |
| 30S ribosomal protein S12                                   | BU251_03065 | 14 | 10 | 1  | 4 | 2 | 14 | 4 |
| hypothetical protein                                        | BU251_04925 | 26 | 12 | 6  | 2 | 2 | 14 | 9 |
| type IV pilin PilA                                          | BU251_06880 | 19 | 12 | 1  | 3 | 0 | 12 | 3 |

|                                                                       |             |    |    |    |   |   |    |   |
|-----------------------------------------------------------------------|-------------|----|----|----|---|---|----|---|
| 5-(carboxyamino)imidazole ribonucleotide mutase                       | BU251_07225 | 17 | 13 | 1  | 5 | 1 | 10 | 0 |
| electron transport complex protein RnfC                               | BU251_07570 | 47 | 9  | 1  | 0 | 0 | 18 | 1 |
| molybdopterin biosynthesis protein MoeA                               | BU251_07780 | 39 | 13 | 11 | 2 | 2 | 13 | 6 |
| guanylate kinase                                                      | BU251_09515 | 23 | 12 | 7  | 3 | 1 | 12 | 1 |
| ABC transporter                                                       | BU251_00455 | 35 | 10 | 2  | 4 | 5 | 14 | 2 |
| NADP-reducing hydrogenase HdnA                                        | BU251_02025 | 18 | 10 | 3  | 4 | 2 | 13 | 0 |
| riboflavin biosynthesis protein RibF                                  | BU251_05810 | 36 | 12 | 5  | 4 | 1 | 12 | 2 |
| pstB                                                                  | BU251_06650 | 28 | 12 | 1  | 3 | 1 | 12 | 1 |
| hypothetical protein                                                  | BU251_07865 | 30 | 9  | 1  | 4 | 1 | 14 | 4 |
| hypothetical protein                                                  | BU251_07975 | 14 | 10 | 1  | 6 | 1 | 11 | 1 |
| hypothetical protein                                                  | BU251_09135 | 21 | 14 | 0  | 2 | 2 | 11 | 0 |
| 2-oxoglutarate oxidoreductase                                         | BU251_09370 | 26 | 14 | 4  | 2 | 2 | 12 | 4 |
| peptidase                                                             | BU251_01945 | 37 | 14 | 1  | 2 | 3 | 11 | 6 |
| hypothetical protein                                                  | BU251_04185 | 29 | 9  | 6  | 5 | 2 | 13 | 1 |
| alanine racemase                                                      | BU251_06075 | 42 | 12 | 8  | 2 | 3 | 13 | 1 |
| 2-C-methyl-D-erythritol 4-phosphate<br>cytidyltransferase             | BU251_06150 | 26 | 11 | 1  | 4 | 3 | 12 | 6 |
| sporulation initiation inhibitor Soj                                  | BU251_09535 | 30 | 10 | 5  | 5 | 3 | 12 | 5 |
| undecaprenyl pyrophosphate phosphatase                                | BU251_06960 | 17 | 9  | 13 | 0 | 0 | 17 | 1 |
| hypothetical protein                                                  | BU251_08445 | 20 | 13 | 1  | 3 | 1 | 10 | 0 |
| hypothetical protein                                                  | BU251_09460 | 24 | 13 | 2  | 0 | 0 | 13 | 1 |
| xanthine and CO dehydrogenases maturation<br>factor, XdhC/CoxF family | BU251_01535 | 27 | 12 | 1  | 2 | 3 | 12 | 1 |
| hypothetical protein                                                  | BU251_03000 | 25 | 11 | 0  | 5 | 1 | 10 | 1 |
| 30S ribosomal protein S17                                             | BU251_03135 | 11 | 9  | 1  | 4 | 1 | 12 | 4 |
| protein containing Type IV pilus assembly PilZ<br>domain              | BU251_03685 | 15 | 12 | 2  | 4 | 1 | 10 | 3 |
| hypothetical protein                                                  | BU251_08035 | 26 | 9  | 1  | 2 | 3 | 14 | 8 |
| protein containing Prepilin-type<br>cleavage/methylation              | BU251_08430 | 21 | 14 | 3  | 3 | 1 | 8  | 1 |

|                                                                                               |             |    |    |   |   |   |    |   |
|-----------------------------------------------------------------------------------------------|-------------|----|----|---|---|---|----|---|
| UDP-N-acetylmuramoyl-L-alanyl-D-glutamate--2, 6-diaminopimelate ligase                        | BU251_05775 | 53 | 9  | 8 | 3 | 1 | 13 | 4 |
| tRNA (adenosine(37)-N6)-threonylcarbamoyltransferase complex dimerization subunit type 1 TsaB | BU251_06080 | 25 | 9  | 3 | 5 | 4 | 11 | 1 |
| hypothetical protein                                                                          | BU251_08075 | 40 | 12 | 8 | 1 | 1 | 12 | 1 |
| hypothetical protein                                                                          | BU251_09020 | 18 | 13 | 4 | 2 | 2 | 11 | 2 |
| ribonuclease PH                                                                               | BU251_01635 | 26 | 12 | 1 | 2 | 3 | 11 | 2 |
| hypothetical protein                                                                          | BU251_02190 | 45 | 14 | 2 | 0 | 0 | 11 | 8 |
| CO dehydrogenase accessory protein CooC (nickel insertion)                                    | BU251_04955 | 27 | 11 | 1 | 1 | 1 | 13 | 6 |
| lipopolysaccharide export system permease protein LptF                                        | BU251_06065 | 41 | 10 | 5 | 6 | 8 | 9  | 1 |
| nitroreductase                                                                                | BU251_06940 | 24 | 3  | 1 | 5 | 0 | 17 | 6 |
| 23S rRNA (adenine(2503)-C(2))-methyltransferase                                               | BU251_07760 | 39 | 11 | 4 | 4 | 1 | 10 | 1 |
| transmembrane and TPR repeat-containing protein                                               | BU251_07990 | 80 | 12 | 4 | 1 | 1 | 12 | 4 |
| V-type ATP synthase subunit D                                                                 | BU251_08220 | 24 | 9  | 3 | 3 | 4 | 13 | 5 |
| tRNA (guanosine(37)-N1)-methyltransferase TrmD                                                | BU251_01245 | 27 | 9  | 4 | 3 | 1 | 12 | 1 |
| dephospho-CoA kinase                                                                          | BU251_01310 | 26 | 9  | 1 | 3 | 1 | 12 | 0 |
| hypothetical protein                                                                          | BU251_01560 | 18 | 12 | 1 | 2 | 2 | 11 | 1 |
| NADPH-dependent 7-cyano-7-deazaguanine reductaseQueF                                          | BU251_01620 | 15 | 11 | 1 | 3 | 1 | 11 | 2 |
| NAD(P)H-hydrate epimerase                                                                     | BU251_02315 | 23 | 11 | 2 | 3 | 4 | 11 | 1 |
| acetoacetyl-CoA synthetase / long-chain-fatty-acid-CoA ligase                                 | BU251_03635 | 58 | 9  | 7 | 4 | 6 | 11 | 2 |
| hypothetical protein                                                                          | BU251_04470 | 18 | 8  | 2 | 3 | 1 | 13 | 3 |
| [NiFe] hydrogenase metalcenter assembly protein HypE                                          | BU251_07815 | 36 | 13 | 5 | 2 | 2 | 10 | 2 |
| hypothetical protein                                                                          | BU251_08140 | 11 | 8  | 3 | 4 | 1 | 12 | 0 |
| DNA helicase UvrD                                                                             | BU251_08300 | 46 | 8  | 3 | 3 | 0 | 13 | 2 |
| hypothetical protein                                                                          | BU251_08380 | 11 | 10 | 1 | 4 | 0 | 10 | 1 |
| lipase family protein                                                                         | BU251_09030 | 31 | 12 | 1 | 4 | 1 | 8  | 1 |

|                                                                          |             |    |    |    |   |   |    |   |
|--------------------------------------------------------------------------|-------------|----|----|----|---|---|----|---|
| hypothetical protein                                                     | BU251_09105 | 38 | 14 | 4  | 0 | 0 | 10 | 2 |
| non-canonical purine NTP pyrophosphatase, RdgB/HAM1 family               | BU251_01640 | 22 | 11 | 1  | 3 | 1 | 10 | 1 |
| alpha-D-GlcNAc alpha-1,2-L-rhamnosyltransferase                          | BU251_01875 | 42 | 10 | 4  | 2 | 2 | 12 | 2 |
| hypothetical protein                                                     | BU251_02850 | 24 | 10 | 1  | 3 | 1 | 11 | 1 |
| ADP-heptose synthase / D-glycero-beta-D-manno-heptose 7-phosphate kinase | BU251_03775 | 17 | 9  | 4  | 4 | 1 | 10 | 1 |
| GTP-binding protein Obg                                                  | BU251_05555 | 35 | 10 | 5  | 3 | 1 | 11 | 1 |
| hypothetical protein                                                     | BU251_01225 | 42 | 11 | 9  | 3 | 1 | 9  | 4 |
| hypothetical protein                                                     | BU251_01920 | 17 | 9  | 1  | 4 | 2 | 11 | 1 |
| 30S ribosomal protein S10                                                | BU251_03085 | 11 | 13 | 3  | 0 | 0 | 10 | 2 |
| trehalose-phosphatase                                                    | BU251_03540 | 30 | 9  | 6  | 2 | 3 | 12 | 2 |
| D-glycero-D-manno-heptose 1-phosphate guanosyltransferase                | BU251_04270 | 26 | 10 | 0  | 2 | 0 | 11 | 4 |
| hypothetical protein                                                     | BU251_06250 | 27 | 9  | 6  | 4 | 1 | 10 | 0 |
| hypothetical protein                                                     | BU251_07055 | 81 | 10 | 5  | 3 | 4 | 11 | 4 |
| hypothetical protein                                                     | BU251_08265 | 28 | 12 | 4  | 2 | 3 | 9  | 3 |
| CO dehydrogenase/acetyl-CoA synthase, acetyl-CoAsynthase subunit         | BU251_01290 | 79 | 7  | 10 | 1 | 1 | 14 | 8 |
| hypothetical protein                                                     | BU251_02055 | 26 | 10 | 2  | 4 | 3 | 9  | 4 |
| GNAT family N-acetyltransferase                                          | BU251_04030 | 17 | 11 | 1  | 3 | 4 | 9  | 2 |
| imidazole glycerol phosphate synthase subunit HisF                       | BU251_05070 | 31 | 9  | 3  | 1 | 1 | 12 | 1 |
| 16S rRNA (guanine(966)-N(2))-methyltransferase RsmD                      | BU251_05440 | 20 | 11 | 2  | 2 | 2 | 10 | 1 |
| ribosomal large subunit pseudouridine synthase D                         | BU251_05675 | 34 | 10 | 4  | 3 | 0 | 10 | 2 |
| fumarate hydratase                                                       | BU251_01625 | 30 | 12 | 3  | 1 | 1 | 9  | 2 |
| UDP-glucose 4-epimerase                                                  | BU251_02235 | 37 | 10 | 5  | 3 | 1 | 10 | 1 |
| hypothetical protein                                                     | BU251_03005 | 41 | 10 | 8  | 2 | 3 | 10 | 3 |
| hypothetical protein                                                     | BU251_07870 | 15 | 11 | 2  | 6 | 2 | 6  | 1 |
| phosphate transport system regulatory protein PhoU                       | BU251_09090 | 23 | 12 | 1  | 0 | 0 | 10 | 8 |

|                                                            |             |    |    |    |   |   |    |   |
|------------------------------------------------------------|-------------|----|----|----|---|---|----|---|
| FAD-dependent pyridine nucleotide-disulfide oxidoreductase | BU251_01590 | 42 | 7  | 4  | 1 | 1 | 13 | 1 |
| hypothetical protein                                       | BU251_02165 | 14 | 9  | 2  | 4 | 1 | 9  | 1 |
| crossover junction endodeoxyribonuclease RuvC              | BU251_03935 | 18 | 12 | 1  | 2 | 2 | 8  | 1 |
| RNA-binding transcriptional accessory protein              | BU251_05975 | 81 | 8  | 11 | 2 | 2 | 12 | 3 |
| hypothetical protein                                       | BU251_06995 | 35 | 10 | 1  | 2 | 3 | 9  | 0 |
| N-acetylmuramoyl-L-alanine amidase                         | BU251_07290 | 29 | 9  | 1  | 2 | 2 | 11 | 1 |
| thiol:disulfide oxidoreductase related to ResA             | BU251_07350 | 18 | 9  | 1  | 3 | 1 | 9  | 0 |
| shikimate kinase I                                         | BU251_00955 | 19 | 12 | 1  | 0 | 0 | 9  | 1 |
| 50S ribosomal protein L16                                  | BU251_03125 | 16 | 9  | 1  | 3 | 0 | 9  | 1 |
| hypothetical protein                                       | BU251_05455 | 26 | 9  | 1  | 3 | 1 | 9  | 1 |
| hypothetical protein                                       | BU251_05640 | 64 | 9  | 9  | 1 | 1 | 11 | 3 |
| hypothetical protein                                       | BU251_06775 | 21 | 11 | 4  | 2 | 3 | 8  | 1 |
| hypothetical protein                                       | BU251_08705 | 13 | 10 | 3  | 2 | 3 | 9  | 1 |
| iron-sulfur cluster assembly protein SufB                  | BU251_02295 | 40 | 8  | 0  | 3 | 0 | 9  | 0 |
| ribosome-recycling factor                                  | BU251_02440 | 60 | 13 | 11 | 0 | 0 | 7  | 3 |
| 50S ribosomal protein L18                                  | BU251_03170 | 10 | 8  | 1  | 6 | 1 | 7  | 1 |
| hypothetical protein                                       | BU251_04345 | 39 | 11 | 4  | 1 | 1 | 9  | 8 |
| hypothetical protein                                       | BU251_05445 | 45 | 12 | 2  | 0 | 0 | 9  | 2 |
| protein containing General secretory system II             | BU251_05630 | 17 | 9  | 0  | 2 | 3 | 9  | 1 |
| ATP-dependent RNA helicase DOB1                            | BU251_06270 | 73 | 10 | 6  | 2 | 2 | 9  | 0 |
| DNA repair protein                                         | BU251_06990 | 21 | 9  | 0  | 1 | 1 | 10 | 3 |
| site-specific DNA-methyltransferase                        | BU251_08755 | 38 | 11 | 8  | 0 | 0 | 10 | 8 |
| hypothetical protein                                       | BU251_00985 | 49 | 8  | 2  | 2 | 2 | 11 | 2 |
| phosphoribosylanthranilate isomerase                       | BU251_01355 | 23 | 11 | 4  | 1 | 1 | 8  | 0 |
| endonuclease III                                           | BU251_01440 | 25 | 8  | 3  | 2 | 3 | 10 | 1 |
| gamma-D-glutamyl-L-lysine dipeptidyl-peptidase             | BU251_01700 | 36 | 9  | 0  | 1 | 1 | 10 | 2 |
| 3-oxoadipate enol-lactonase                                | BU251_02420 | 33 | 11 | 1  | 2 | 0 | 7  | 1 |
| NADH-ubiquinone oxidoreductase chain C                     | BU251_04520 | 18 | 10 | 2  | 5 | 1 | 6  | 2 |
| hypothetical protein                                       | BU251_05250 | 26 | 7  | 2  | 0 | 0 | 13 | 6 |

|                                                        |             |    |    |   |   |   |    |   |
|--------------------------------------------------------|-------------|----|----|---|---|---|----|---|
| rubrerythrin family protein                            | BU251_06435 | 32 | 12 | 1 | 1 | 1 | 7  | 1 |
| thioredoxin reductase                                  | BU251_00500 | 32 | 10 | 1 | 1 | 1 | 9  | 2 |
| lipopolysaccharide heptosyltransferase II              | BU251_01015 | 40 | 10 | 4 | 3 | 1 | 7  | 2 |
| transcription elongation factor GreA                   | BU251_01570 | 18 | 9  | 2 | 2 | 2 | 9  | 4 |
| TPR Domain containing protein                          | BU251_02415 | 21 | 10 | 1 | 0 | 0 | 9  | 4 |
| hypothetical protein                                   | BU251_04080 | 81 | 6  | 8 | 2 | 2 | 12 | 2 |
| biotin--[acetyl-CoA-carboxylase] ligase                | BU251_04750 | 29 | 10 | 1 | 2 | 2 | 8  | 1 |
| UDP-N-acetylmuramoylalanine--D-glutamate ligase        | BU251_05760 | 46 | 6  | 4 | 2 | 0 | 11 | 1 |
| hypothetical protein                                   | BU251_07000 | 18 | 8  | 3 | 2 | 2 | 10 | 1 |
| exodeoxyribonuclease VII large subunit                 | BU251_09395 | 43 | 10 | 1 | 0 | 0 | 9  | 4 |
| 50S ribosomal protein L20                              | BU251_09465 | 14 | 8  | 1 | 2 | 3 | 9  | 6 |
| hypothetical protein                                   | BU251_02065 | 26 | 10 | 6 | 2 | 2 | 7  | 3 |
| hypothetical protein                                   | BU251_07495 | 33 | 11 | 4 | 0 | 0 | 8  | 1 |
| cysteine desulfurase NifS                              | BU251_00355 | 43 | 9  | 3 | 0 | 0 | 9  | 4 |
| nucleotide exchange factor GrpE                        | BU251_02925 | 23 | 6  | 0 | 3 | 4 | 10 | 5 |
| 3-oxoacyl-[acyl-carrier-protein] synthase, KASII       | BU251_03285 | 46 | 9  | 2 | 2 | 0 | 8  | 2 |
| hypothetical protein                                   | BU251_05480 | 14 | 6  | 8 | 5 | 1 | 8  | 3 |
| [NiFe] hydrogenase metallocenter assembly protein HypD | BU251_07820 | 40 | 6  | 3 | 0 | 0 | 12 | 1 |
| hypothetical protein                                   | BU251_02425 | 46 | 7  | 1 | 1 | 1 | 10 | 3 |
| hypothetical protein                                   | BU251_04000 | 21 | 10 | 2 | 3 | 4 | 5  | 7 |
| hypothetical protein                                   | BU251_04375 | 37 | 7  | 4 | 3 | 4 | 8  | 3 |
| hypothetical protein                                   | BU251_08175 | 27 | 9  | 1 | 0 | 0 | 9  | 1 |
| hypothetical protein                                   | BU251_00080 | 59 | 10 | 8 | 0 | 0 | 7  | 3 |
| protease                                               | BU251_00340 | 19 | 7  | 3 | 3 | 0 | 7  | 1 |
| polysaccharide deacetylase                             | BU251_01010 | 30 | 9  | 1 | 1 | 1 | 7  | 0 |
| 1-deoxy-D-xylulose-5-phosphate reductoisomerase        | BU251_01145 | 42 | 8  | 1 | 0 | 0 | 9  | 1 |
| formiminotetrahydrofolate cyclodeaminase               | BU251_01270 | 18 | 9  | 1 | 0 | 0 | 9  | 1 |
| hypothetical protein                                   | BU251_01425 | 42 | 9  | 5 | 3 | 1 | 6  | 3 |
| type I methionyl aminopeptidase                        | BU251_03195 | 27 | 7  | 3 | 1 | 1 | 9  | 3 |



|                                                                                                                             |             |    |    |   |   |   |    |   |
|-----------------------------------------------------------------------------------------------------------------------------|-------------|----|----|---|---|---|----|---|
| hypothetical protein                                                                                                        | BU251_03630 | 15 | 8  | 0 | 3 | 1 | 6  | 0 |
| general secretion pathway protein B                                                                                         | BU251_03700 | 16 | 9  | 1 | 0 | 0 | 8  | 0 |
| pantetheine-phosphate adenyllyltransferase                                                                                  | BU251_05435 | 18 | 7  | 1 | 3 | 4 | 8  | 1 |
| UDP-N-acetylglucosamine--N-acetylmuramyl-<br>(pentapeptide) pyrophosphoryl-undecaprenol N-<br>acetylglucosamine transferase | BU251_05750 | 39 | 7  | 2 | 3 | 1 | 8  | 4 |
| phosphate ABC transporter ATP-binding protein                                                                               | BU251_06645 | 28 | 5  | 3 | 0 | 0 | 12 | 4 |
| ADP-ribose pyrophosphatase                                                                                                  | BU251_07270 | 20 | 7  | 3 | 2 | 0 | 8  | 1 |
| glycine cleavage system protein H                                                                                           | BU251_07315 | 14 | 6  | 1 | 3 | 1 | 8  | 0 |
| hypothetical protein                                                                                                        | BU251_08435 | 15 | 8  | 3 | 1 | 1 | 8  | 3 |
| diguanylate cyclase/phosphodiesterase (GGDEF &<br>EAL domains) with PAS/PAC sensor(s)                                       | BU251_02970 | 39 | 8  | 3 | 1 | 1 | 8  | 6 |
| 50S ribosomal protein L14                                                                                                   | BU251_03140 | 13 | 8  | 2 | 3 | 1 | 6  | 3 |
| hypothetical protein                                                                                                        | BU251_03595 | 27 | 8  | 0 | 2 | 2 | 7  | 4 |
| TPR domain protein                                                                                                          | BU251_05745 | 31 | 6  | 4 | 3 | 1 | 9  | 4 |
| hypothetical protein                                                                                                        | BU251_05845 | 21 | 8  | 1 | 2 | 3 | 7  | 2 |
| hypothetical protein                                                                                                        | BU251_06110 | 28 | 9  | 2 | 0 | 0 | 8  | 0 |
| glycoside hydrolase                                                                                                         | BU251_06450 | 43 | 7  | 6 | 2 | 0 | 8  | 2 |
| hypothetical protein                                                                                                        | BU251_07345 | 28 | 9  | 5 | 3 | 0 | 5  | 1 |
| electron transport complex protein RnfD                                                                                     | BU251_07560 | 34 | 8  | 6 | 1 | 1 | 8  | 1 |
| DNA-binding response regulator                                                                                              | BU251_09110 | 26 | 10 | 3 | 0 | 0 | 7  | 2 |
| hypothetical protein                                                                                                        | BU251_01755 | 17 | 8  | 1 | 0 | 0 | 9  | 4 |
| GGDEF/response regulator receiver domain protein                                                                            | BU251_02965 | 49 | 8  | 4 | 0 | 0 | 9  | 6 |
| hypothetical protein                                                                                                        | BU251_03750 | 25 | 8  | 3 | 3 | 1 | 5  | 1 |
| hypothetical protein                                                                                                        | BU251_04360 | 46 | 7  | 4 | 0 | 0 | 9  | 1 |
| hypothetical protein                                                                                                        | BU251_06485 | 44 | 6  | 0 | 1 | 1 | 9  | 1 |
| hypothetical protein                                                                                                        | BU251_02740 | 10 | 6  | 0 | 2 | 2 | 8  | 4 |
| GTPase HflX                                                                                                                 | BU251_02900 | 47 | 10 | 1 | 0 | 0 | 6  | 1 |
| 50S ribosomal protein L11                                                                                                   | BU251_03035 | 15 | 9  | 4 | 0 | 0 | 7  | 1 |
| septum formation protein Maf                                                                                                | BU251_06045 | 49 | 9  | 4 | 0 | 0 | 7  | 1 |

|                                                                        |             |    |   |   |   |   |    |   |
|------------------------------------------------------------------------|-------------|----|---|---|---|---|----|---|
| ferric siderophore transport system, biopolymer transport protein ExbB | BU251_07595 | 22 | 9 | 1 | 0 | 0 | 7  | 2 |
| 6-carboxytetrahydropterin synthase QueD                                | BU251_01605 | 15 | 7 | 4 | 2 | 2 | 7  | 1 |
| heavy metal translocating P-type ATPase                                | BU251_01785 | 82 | 4 | 5 | 3 | 4 | 9  | 8 |
| GNAT family N-acetyltransferase                                        | BU251_02570 | 18 | 7 | 4 | 4 | 1 | 5  | 0 |
| hypothetical protein                                                   | BU251_03570 | 36 | 8 | 0 | 0 | 0 | 7  | 0 |
| thymidylate synthase                                                   | BU251_04840 | 29 | 6 | 1 | 3 | 1 | 7  | 2 |
| hypothetical protein                                                   | BU251_04850 | 15 | 9 | 3 | 0 | 0 | 6  | 1 |
| hypothetical protein                                                   | BU251_06950 | 22 | 8 | 0 | 0 | 0 | 7  | 0 |
| hypothetical protein                                                   | BU251_06980 | 26 | 6 | 0 | 0 | 0 | 9  | 0 |
| hypothetical protein                                                   | BU251_07175 | 22 | 6 | 2 | 0 | 0 | 10 | 5 |
| hypothetical protein                                                   | BU251_09355 | 32 | 8 | 1 | 2 | 0 | 5  | 1 |
| response regulator                                                     | BU251_01435 | 15 | 6 | 1 | 1 | 1 | 8  | 1 |
| hypothetical protein                                                   | BU251_02250 | 30 | 8 | 4 | 0 | 0 | 7  | 0 |
| putative metallophosphoesterase                                        | BU251_03740 | 18 | 5 | 1 | 4 | 1 | 7  | 1 |
| nucleotidyl transferase                                                | BU251_04325 | 27 | 9 | 1 | 0 | 0 | 6  | 0 |
| pyridoxamine 5'-phosphate oxidase                                      | BU251_05460 | 16 | 7 | 2 | 0 | 0 | 8  | 1 |
| ribosome silencing factor                                              | BU251_06005 | 13 | 6 | 3 | 2 | 0 | 7  | 2 |
| hypothetical protein                                                   | BU251_07010 | 35 | 7 | 3 | 1 | 1 | 7  | 1 |
| hypothetical protein                                                   | BU251_08180 | 24 | 8 | 6 | 3 | 1 | 4  | 6 |
| cupin                                                                  | BU251_09130 | 12 | 8 | 1 | 1 | 1 | 6  | 2 |
| sugar ABC transporter permease                                         | BU251_00195 | 40 | 9 | 5 | 2 | 3 | 4  | 5 |
| hypothetical protein                                                   | BU251_00450 | 18 | 7 | 2 | 0 | 0 | 8  | 2 |
| outer membrane efflux protein precursor                                | BU251_02060 | 50 | 8 | 2 | 1 | 1 | 6  | 2 |
| metal-dependent hydrolase of the beta-lactamase superfamily            | BU251_02140 | 29 | 8 | 4 | 1 | 1 | 6  | 1 |
| hypothetical protein                                                   | BU251_04165 | 42 | 7 | 5 | 2 | 2 | 6  | 4 |
| hypothetical protein                                                   | BU251_04465 | 14 | 5 | 0 | 1 | 1 | 8  | 6 |
| secreted protein containing Prepilin-type cleavage/methylation         | BU251_05170 | 15 | 6 | 3 | 3 | 1 | 6  | 1 |

|                                                                    |             |    |   |   |   |   |    |   |
|--------------------------------------------------------------------|-------------|----|---|---|---|---|----|---|
| hypothetical protein                                               | BU251_05690 | 15 | 6 | 2 | 0 | 0 | 9  | 1 |
| transmembrane and TPR repeat-containing protein                    | BU251_06315 | 32 | 7 | 1 | 2 | 2 | 6  | 1 |
| cupin                                                              | BU251_07280 | 11 | 6 | 1 | 1 | 1 | 8  | 1 |
| hypothetical protein                                               | BU251_07890 | 24 | 7 | 3 | 0 | 0 | 7  | 1 |
| phosphate regulon transcriptional regulatory protein PhoB (SphR)   | BU251_02310 | 14 | 5 | 1 | 3 | 0 | 6  | 0 |
| hypothetical protein                                               | BU251_03610 | 26 | 8 | 2 | 0 | 0 | 6  | 1 |
| ATP-dependent DNA helicase UvrD/PcrA, proteobacterial protein      | BU251_04660 | 78 | 6 | 8 | 0 | 0 | 8  | 0 |
| biopolymer transport protein ExbD                                  | BU251_05245 | 14 | 8 | 1 | 1 | 1 | 5  | 1 |
| hypothetical protein                                               | BU251_06220 | 14 | 8 | 0 | 0 | 0 | 6  | 1 |
| hypothetical protein                                               | BU251_07415 | 55 | 6 | 5 | 0 | 0 | 8  | 0 |
| RNA polymerase sigma factor RpoE                                   | BU251_07660 | 21 | 6 | 3 | 0 | 0 | 8  | 2 |
| hypothetical protein                                               | BU251_07765 | 17 | 8 | 1 | 1 | 1 | 5  | 1 |
| TrpB-like pyridoxal-phosphate dependent enzyme                     | BU251_08145 | 50 | 8 | 2 | 0 | 0 | 6  | 4 |
| tRNA (N6-threonylcarbamoyladenosine(37)-N6)-methyltransferase TrmO | BU251_08690 | 19 | 7 | 2 | 1 | 1 | 6  | 1 |
| 30S ribosomal protein S6                                           | BU251_00640 | 12 | 7 | 1 | 1 | 1 | 5  | 4 |
| hypothetical protein                                               | BU251_00700 | 27 | 5 | 3 | 0 | 0 | 8  | 4 |
| preprotein translocase subunit SecY                                | BU251_03185 | 50 | 7 | 4 | 0 | 0 | 6  | 1 |
| hypothetical protein                                               | BU251_04320 | 74 | 5 | 1 | 2 | 3 | 7  | 2 |
| RNA-splicing ligase RtcB                                           | BU251_06780 | 53 | 4 | 5 | 0 | 0 | 10 | 2 |
| secondary thiamine-phosphate synthase enzyme                       | BU251_08135 | 16 | 7 | 0 | 0 | 0 | 6  | 0 |
| 5,10-methylenetetrahydrofolate reductase                           | BU251_01280 | 28 | 7 | 2 | 2 | 0 | 4  | 0 |
| hypothetical protein                                               | BU251_01480 | 9  | 6 | 1 | 3 | 1 | 5  | 1 |
| phosphatidylethanolamine-binding protein                           | BU251_02175 | 22 | 1 | 1 | 3 | 0 | 9  | 1 |
| sigma-54 dependent transcriptional regulator/response regulator    | BU251_02755 | 23 | 7 | 3 | 0 | 0 | 6  | 1 |
| hypothetical protein                                               | BU251_03365 | 31 | 5 | 3 | 0 | 0 | 8  | 2 |
| D-alanyl-D-alanine carboxypeptidase                                | BU251_04605 | 30 | 7 | 3 | 1 | 1 | 5  | 2 |
| hypothetical protein                                               | BU251_04650 | 17 | 5 | 1 | 3 | 1 | 6  | 1 |

|                                                                   |             |    |   |   |   |   |   |   |
|-------------------------------------------------------------------|-------------|----|---|---|---|---|---|---|
| transmembrane and TPR repeat-containing protein CG5038            | BU251_04940 | 75 | 6 | 4 | 3 | 4 | 5 | 4 |
| protein containing Prepilin-type cleavage/methylation             | BU251_05175 | 19 | 9 | 1 | 0 | 0 | 4 | 5 |
| polyphosphoinositide phosphatase                                  | BU251_05210 | 18 | 7 | 1 | 0 | 0 | 6 | 1 |
| hypothetical protein                                              | BU251_05450 | 8  | 6 | 1 | 1 | 1 | 6 | 0 |
| hypothetical protein                                              | BU251_07090 | 19 | 7 | 1 | 1 | 1 | 5 | 0 |
| tRNA uridine-5-carboxymethylaminomethyl(34) synthesis GTPase MnME | BU251_08020 | 52 | 7 | 4 | 0 | 0 | 6 | 1 |
| hypothetical protein                                              | BU251_01205 | 22 | 6 | 4 | 2 | 2 | 5 | 0 |
| 50S ribosomal protein L23                                         | BU251_03100 | 11 | 6 | 2 | 1 | 1 | 6 | 1 |
| 50S ribosomal protein L24                                         | BU251_03145 | 12 | 5 | 1 | 0 | 0 | 7 | 1 |
| hypothetical protein                                              | BU251_03580 | 40 | 6 | 1 | 0 | 0 | 6 | 1 |
| hypothetical protein                                              | BU251_03590 | 16 | 5 | 2 | 0 | 0 | 8 | 2 |
| hypothetical protein                                              | BU251_04340 | 38 | 5 | 4 | 1 | 1 | 7 | 6 |
| riboflavin synthase bacterial/eukaryotic                          | BU251_05875 | 21 | 8 | 5 | 0 | 0 | 5 | 2 |
| 30S ribosomal protein S15                                         | BU251_05960 | 10 | 5 | 0 | 2 | 3 | 5 | 0 |
| UDP-3-O-acyl-N-acetylglucosamine deacetylase                      | BU251_06375 | 23 | 6 | 1 | 0 | 0 | 7 | 5 |
| archease                                                          | BU251_06785 | 13 | 7 | 1 | 2 | 2 | 4 | 0 |
| hypothetical protein                                              | BU251_07015 | 17 | 5 | 1 | 3 | 1 | 5 | 1 |
| cold-shock protein                                                | BU251_01795 | 7  | 3 | 0 | 5 | 6 | 4 | 6 |
| hypothetical protein                                              | BU251_01885 | 63 | 7 | 9 | 1 | 1 | 4 | 3 |
| hypothetical protein                                              | BU251_04140 | 43 | 6 | 1 | 0 | 0 | 6 | 1 |
| methionyl-tRNA formyltransferase                                  | BU251_04255 | 34 | 4 | 6 | 1 | 1 | 7 | 2 |
| rRNA small subunit methyltransferase A                            | BU251_05025 | 31 | 5 | 1 | 0 | 0 | 7 | 1 |
| transcription antitermination factor NusB                         | BU251_05890 | 16 | 6 | 1 | 0 | 0 | 6 | 3 |
| hypothetical protein                                              | BU251_06765 | 23 | 6 | 1 | 0 | 0 | 6 | 1 |
| hypothetical protein                                              | BU251_08685 | 34 | 4 | 1 | 1 | 1 | 7 | 1 |
| tyrosine recombinase XerC                                         | BU251_00980 | 33 | 6 | 4 | 0 | 0 | 5 | 1 |
| hypothetical protein                                              | BU251_03310 | 43 | 7 | 6 | 0 | 0 | 4 | 0 |

|                                                                                                |             |    |   |   |   |   |   |   |
|------------------------------------------------------------------------------------------------|-------------|----|---|---|---|---|---|---|
| nitroreductase family protein                                                                  | BU251_03980 | 19 | 6 | 0 | 1 | 1 | 4 | 1 |
| hypothetical protein                                                                           | BU251_04150 | 46 | 6 | 4 | 0 | 0 | 6 | 4 |
| hypothetical protein                                                                           | BU251_04160 | 41 | 5 | 4 | 1 | 1 | 5 | 1 |
| hypothetical protein                                                                           | BU251_04480 | 22 | 6 | 1 | 0 | 0 | 6 | 4 |
| tRNA (adenosine(37)-N6)-<br>threonylcarbamoyltransferase complex ATPase<br>subunit type 1 TsaE | BU251_06090 | 17 | 5 | 1 | 2 | 0 | 5 | 1 |
| TPR repeat                                                                                     | BU251_00710 | 74 | 5 | 1 | 3 | 1 | 3 | 0 |
| fumarate hydratase                                                                             | BU251_01630 | 20 | 6 | 1 | 0 | 0 | 5 | 1 |
| dTDP-4-dehydrorhamnose 3,5-epimerase                                                           | BU251_02240 | 20 | 2 | 3 | 1 | 1 | 8 | 1 |
| phosphoribosyl transferase domain protein                                                      | BU251_02270 | 25 | 6 | 0 | 0 | 0 | 5 | 1 |
| hypothetical protein                                                                           | BU251_02400 | 40 | 5 | 2 | 0 | 0 | 6 | 4 |
| hypothetical protein                                                                           | BU251_03835 | 35 | 6 | 5 | 0 | 0 | 5 | 1 |
| excinuclease ABC subunit C                                                                     | BU251_07135 | 48 | 6 | 4 | 0 | 0 | 5 | 3 |
| transcriptional regulator NrdR                                                                 | BU251_07195 | 18 | 6 | 1 | 0 | 0 | 5 | 2 |
| peptide deformylase                                                                            | BU251_02115 | 16 | 4 | 1 | 2 | 3 | 5 | 1 |
| hypothetical protein                                                                           | BU251_02395 | 26 | 5 | 0 | 0 | 0 | 5 | 1 |
| AmmeMemoRadISam system protein B                                                               | BU251_03830 | 29 | 7 | 5 | 0 | 0 | 4 | 1 |
| cytidine deaminase                                                                             | BU251_07205 | 17 | 5 | 1 | 1 | 1 | 4 | 0 |
| ribose 5-phosphate isomerase B                                                                 | BU251_07215 | 17 | 4 | 5 | 0 | 0 | 7 | 2 |
| hypothetical protein                                                                           | BU251_08060 | 28 | 5 | 4 | 0 | 0 | 6 | 2 |
| hypothetical protein                                                                           | BU251_00145 | 8  | 3 | 4 | 2 | 3 | 5 | 3 |
| multidrug ABC transporter ATP-binding protein                                                  | BU251_00750 | 35 | 5 | 1 | 0 | 0 | 5 | 0 |
| hypothetical protein                                                                           | BU251_01890 | 56 | 6 | 3 | 0 | 0 | 4 | 1 |
| purine nucleoside phosphorylase                                                                | BU251_02135 | 17 | 6 | 1 | 0 | 0 | 4 | 1 |
| hypothetical protein                                                                           | BU251_03845 | 28 | 4 | 1 | 0 | 0 | 6 | 5 |
| protein-arginine kinase activator protein                                                      | BU251_06195 | 20 | 6 | 2 | 0 | 0 | 4 | 6 |
| hypothetical protein                                                                           | BU251_06530 | 15 | 7 | 1 | 0 | 0 | 3 | 0 |
| hypothetical protein                                                                           | BU251_07900 | 20 | 5 | 0 | 0 | 0 | 5 | 1 |
| flavin reductase                                                                               | BU251_08165 | 20 | 5 | 1 | 0 | 0 | 5 | 1 |

|                                                                          |             |    |   |   |   |   |   |    |
|--------------------------------------------------------------------------|-------------|----|---|---|---|---|---|----|
| Fe-S cluster assembly scaffold protein NifU                              | BU251_09415 | 14 | 6 | 1 | 0 | 0 | 4 | 0  |
| pyruvate:ferredoxin oxidoreductase, delta subunit                        | BU251_00530 | 9  | 2 | 3 | 0 | 0 | 7 | 3  |
| hypothetical protein                                                     | BU251_00785 | 68 | 7 | 2 | 0 | 0 | 3 | 1  |
| NADP-reducing hydrogenase HdnB                                           | BU251_02010 | 13 | 4 | 1 | 1 | 1 | 5 | 1  |
| transketolase, N-terminal section                                        | BU251_02220 | 31 | 4 | 3 | 0 | 0 | 5 | 0  |
| SAM-dependent methyltransferase                                          | BU251_02375 | 31 | 5 | 1 | 1 | 1 | 4 | 1  |
| K <sup>+</sup> /H <sup>+</sup> antiporter                                | BU251_02790 | 53 | 4 | 1 | 0 | 0 | 6 | 2  |
| hypothetical protein                                                     | BU251_04110 | 40 | 4 | 3 | 2 | 2 | 4 | 5  |
| hypothetical protein                                                     | BU251_04355 | 60 | 5 | 7 | 1 | 1 | 3 | 4  |
| hypothetical protein                                                     | BU251_07725 | 22 | 0 | 0 | 9 | 4 | 0 | 0  |
| hypothetical protein                                                     | BU251_09450 | 55 | 6 | 8 | 0 | 0 | 3 | 4  |
| phosphoglycolate phosphatase                                             | BU251_00265 | 26 | 2 | 3 | 1 | 1 | 6 | 4  |
| tRNA preQ1(34) S-adenosylmethionine<br>ribosyltransferase-isomerase QueA | BU251_01230 | 39 | 4 | 5 | 0 | 0 | 5 | 3  |
| CTP:molybdopterin cytidyltransferase                                     | BU251_01530 | 22 | 5 | 0 | 0 | 0 | 4 | 1  |
| cold-shock protein                                                       | BU251_03490 | 7  | 0 | 0 | 0 | 0 | 9 | 12 |
| hypothetical protein                                                     | BU251_03665 | 9  | 3 | 1 | 1 | 1 | 5 | 1  |
| hypothetical protein                                                     | BU251_03680 | 22 | 5 | 1 | 0 | 0 | 4 | 1  |
| hypothetical protein                                                     | BU251_04990 | 17 | 6 | 0 | 0 | 0 | 3 | 4  |
| phosphoribosyl-AMP cyclohydrolase                                        | BU251_05065 | 14 | 5 | 1 | 0 | 0 | 4 | 0  |
| ribosomal protein S12p methylthiotransferase                             | BU251_05940 | 50 | 4 | 2 | 2 | 3 | 3 | 1  |
| 4-hydroxy-3-methylbut-2-enyl diphosphate<br>reductase                    | BU251_06320 | 31 | 4 | 5 | 0 | 0 | 5 | 7  |
| RNA pseudouridine synthase                                               | BU251_06490 | 28 | 4 | 0 | 0 | 0 | 5 | 6  |
| recombination protein RecR                                               | BU251_06520 | 22 | 3 | 1 | 0 | 0 | 6 | 1  |
| hypothetical protein                                                     | BU251_06695 | 47 | 9 | 1 | 0 | 0 | 0 | 0  |
| A/G-specific adenine glycosylase                                         | BU251_06715 | 40 | 7 | 7 | 0 | 0 | 2 | 2  |
| phosphoribosylformylglycinamide synthase I                               | BU251_07245 | 29 | 6 | 2 | 0 | 0 | 3 | 4  |
| V-type ATP synthase subunit K                                            | BU251_08205 | 15 | 7 | 3 | 0 | 0 | 2 | 2  |
| tRNA guanosine(34) transglycosylase Tgt                                  | BU251_01240 | 42 | 3 | 0 | 0 | 0 | 5 | 1  |

|                                                                     |             |    |   |   |   |   |   |   |
|---------------------------------------------------------------------|-------------|----|---|---|---|---|---|---|
| membrane fusion component of tripartite multidrug resistance system | BU251_01770 | 32 | 4 | 1 | 1 | 1 | 4 | 1 |
| MBL fold metallo-hydrolase                                          | BU251_02285 | 32 | 4 | 2 | 0 | 0 | 5 | 1 |
| hypothetical protein                                                | BU251_04290 | 37 | 5 | 7 | 0 | 0 | 3 | 0 |
| hypothetical protein                                                | BU251_04980 | 12 | 5 | 1 | 0 | 0 | 3 | 1 |
| hypothetical protein                                                | BU251_06050 | 44 | 3 | 0 | 1 | 1 | 4 | 0 |
| hypothetical protein                                                | BU251_07985 | 58 | 7 | 1 | 0 | 0 | 1 | 1 |
| 5-formyltetrahydrofolate cyclo-ligase                               | BU251_09410 | 22 | 4 | 1 | 1 | 1 | 4 | 1 |
| hypothetical protein                                                | BU251_00115 | 14 | 3 | 4 | 0 | 0 | 5 | 1 |
| glycosyl transferase, family 2                                      | BU251_00790 | 27 | 4 | 1 | 0 | 0 | 4 | 0 |
| undecaprenyl diphosphate synthase                                   | BU251_01135 | 28 | 3 | 0 | 1 | 1 | 4 | 1 |
| hypothetical protein                                                | BU251_01575 | 18 | 3 | 4 | 0 | 0 | 5 | 1 |
| hypothetical protein                                                | BU251_02735 | 8  | 3 | 1 | 1 | 1 | 4 | 1 |
| hypothetical protein                                                | BU251_03745 | 64 | 6 | 8 | 0 | 0 | 2 | 3 |
| secondary thiamine-phosphate synthase enzyme                        | BU251_04640 | 17 | 5 | 2 | 0 | 0 | 3 | 0 |
| hypothetical protein                                                | BU251_06885 | 26 | 4 | 5 | 0 | 0 | 4 | 0 |
| [NiFe] hydrogenase metallocenter assembly protein HypF              | BU251_07830 | 43 | 5 | 6 | 0 | 0 | 3 | 4 |
| hypothetical protein                                                | BU251_08160 | 20 | 4 | 1 | 0 | 0 | 4 | 1 |
| O-acetyl-ADP-ribose deacetylase                                     | BU251_00810 | 18 | 4 | 1 | 0 | 0 | 3 | 0 |
| ribosome maturation factor RimP                                     | BU251_01175 | 18 | 4 | 1 | 0 | 0 | 4 | 1 |
| hypothetical protein                                                | BU251_02365 | 26 | 2 | 0 | 1 | 1 | 4 | 1 |
| proline iminopeptidase                                              | BU251_03505 | 32 | 4 | 6 | 0 | 0 | 3 | 1 |
| hypothetical protein                                                | BU251_03870 | 24 | 4 | 1 | 0 | 0 | 4 | 1 |
| hypothetical protein                                                | BU251_03875 | 13 | 3 | 4 | 2 | 2 | 3 | 1 |
| DNA polymerase III subunit delta'                                   | BU251_06125 | 35 | 4 | 5 | 0 | 0 | 4 | 5 |
| 3-oxoacyl-[acyl-carrier protein] reductase                          | BU251_06470 | 28 | 4 | 2 | 0 | 0 | 4 | 1 |
| hypothetical protein                                                | BU251_06720 | 37 | 4 | 1 | 0 | 0 | 4 | 2 |
| hypothetical protein                                                | BU251_06900 | 34 | 4 | 0 | 0 | 0 | 3 | 4 |
| hypothetical protein                                                | BU251_06915 | 18 | 4 | 1 | 0 | 0 | 3 | 0 |

|                                                                                 |             |    |   |   |   |   |   |   |
|---------------------------------------------------------------------------------|-------------|----|---|---|---|---|---|---|
| peptide chain release factor 2                                                  | BU251_07120 | 41 | 4 | 2 | 1 | 1 | 3 | 4 |
| magnesium transporter                                                           | BU251_09075 | 51 | 3 | 1 | 0 | 0 | 5 | 6 |
| TPR domain protein                                                              | BU251_00585 | 36 | 4 | 0 | 0 | 0 | 3 | 1 |
| ABC-type multidrug transport system, permease component                         | BU251_00755 | 43 | 4 | 1 | 0 | 0 | 3 | 4 |
| RNA polymerase sigma factor RpoE                                                | BU251_01465 | 23 | 5 | 1 | 0 | 0 | 2 | 0 |
| hypothetical protein                                                            | BU251_01825 | 15 | 4 | 1 | 0 | 0 | 3 | 1 |
| K <sup>+</sup> /H <sup>+</sup> antiporter                                       | BU251_02335 | 53 | 3 | 4 | 0 | 0 | 4 | 1 |
| 3-methyl-2-oxobutanoate hydroxymethyltransferase                                | BU251_04595 | 29 | 3 | 0 | 0 | 0 | 4 | 1 |
| undecaprenyl phosphate-alpha-4-amino-4-deoxy-L-arabinose arabinosyl transferase | BU251_06350 | 64 | 4 | 5 | 1 | 1 | 2 | 3 |
| hypothetical protein                                                            | BU251_06955 | 21 | 2 | 2 | 0 | 0 | 5 | 0 |
| hypothetical protein                                                            | BU251_07730 | 49 | 4 | 1 | 0 | 0 | 3 | 1 |
| hypothetical protein                                                            | BU251_08270 | 30 | 1 | 1 | 0 | 0 | 6 | 1 |
| hypothetical protein                                                            | BU251_08655 | 46 | 4 | 2 | 1 | 1 | 2 | 3 |
| ferrous iron transport protein A                                                | BU251_00300 | 9  | 3 | 1 | 0 | 0 | 3 | 0 |
| hypothetical protein                                                            | BU251_02630 | 9  | 0 | 0 | 0 | 0 | 6 | 3 |
| hypothetical protein                                                            | BU251_02825 | 10 | 3 | 0 | 0 | 0 | 3 | 1 |
| hypothetical protein                                                            | BU251_04175 | 48 | 3 | 4 | 0 | 0 | 4 | 1 |
| regulatory protein RecX                                                         | BU251_05100 | 18 | 3 | 1 | 0 | 0 | 3 | 1 |
| hypothetical protein                                                            | BU251_05835 | 50 | 2 | 3 | 0 | 0 | 4 | 0 |
| hypothetical protein                                                            | BU251_06325 | 47 | 2 | 3 | 0 | 0 | 4 | 0 |
| hypothetical protein                                                            | BU251_06625 | 31 | 5 | 3 | 0 | 0 | 1 | 1 |
| hypothetical protein                                                            | BU251_07150 | 26 | 4 | 1 | 0 | 0 | 3 | 1 |
| hypothetical protein                                                            | BU251_08085 | 57 | 3 | 4 | 0 | 0 | 4 | 2 |
| dihydroorotase                                                                  | BU251_08310 | 46 | 2 | 3 | 0 | 0 | 4 | 0 |
| ATP synthase gamma chain                                                        | BU251_08475 | 36 | 3 | 1 | 0 | 0 | 3 | 1 |
| hypothetical protein                                                            | BU251_09050 | 27 | 5 | 2 | 0 | 0 | 2 | 2 |
| hypothetical protein                                                            | BU251_09095 | 20 | 3 | 1 | 0 | 0 | 4 | 5 |



|                                                 |             |    |   |   |   |   |   |   |
|-------------------------------------------------|-------------|----|---|---|---|---|---|---|
| hypothetical protein                            | BU251_01040 | 34 | 2 | 2 | 0 | 0 | 4 | 1 |
| molybdenum ABC transporter ATP-binding protein  | BU251_01695 | 31 | 2 | 2 | 0 | 0 | 4 | 3 |
| MFS transporter                                 | BU251_01995 | 43 | 2 | 3 | 3 | 4 | 1 | 1 |
| retron-type RNA-directed DNA polymerase         | BU251_02720 | 45 | 3 | 4 | 0 | 0 | 3 | 4 |
| hypothetical protein                            | BU251_03605 | 26 | 3 | 4 | 0 | 0 | 3 | 1 |
| tRNA pseudouridine(55) synthase TruB            | BU251_05815 | 26 | 2 | 0 | 0 | 0 | 4 | 2 |
| metal-dependent phosphoesterases (PHP family)   | BU251_05885 | 31 | 3 | 4 | 0 | 0 | 3 | 1 |
| phosphate ABC transporter permease subunit PstC | BU251_06660 | 32 | 2 | 2 | 1 | 1 | 4 | 1 |
| hypothetical protein                            | BU251_07755 | 15 | 2 | 2 | 0 | 0 | 4 | 1 |
| hypothetical protein                            | BU251_08350 | 20 | 2 | 2 | 0 | 0 | 4 | 1 |
| hypothetical protein                            | BU251_09420 | 23 | 2 | 0 | 0 | 0 | 4 | 1 |
| transcriptional regulator                       | BU251_00335 | 17 | 2 | 2 | 0 | 0 | 4 | 1 |
| 1-acyl-sn-glycerol-3-phosphate acyltransferase  | BU251_00445 | 29 | 2 | 2 | 0 | 0 | 4 | 1 |
| hypothetical protein                            | BU251_00725 | 14 | 3 | 0 | 0 | 0 | 2 | 0 |
| DipZ protein                                    | BU251_01450 | 24 | 4 | 2 | 0 | 0 | 2 | 2 |
| hypothetical protein                            | BU251_01750 | 20 | 2 | 2 | 0 | 0 | 4 | 1 |
| hypothetical protein                            | BU251_02090 | 43 | 4 | 1 | 0 | 0 | 2 | 2 |
| DNA-binding response regulator KdpE             | BU251_02300 | 14 | 3 | 1 | 0 | 0 | 2 | 3 |
| hypothetical protein                            | BU251_02575 | 10 | 3 | 0 | 0 | 0 | 2 | 0 |
| transcription elongation factor GreAB           | BU251_02830 | 16 | 2 | 2 | 0 | 0 | 4 | 2 |
| hypothetical protein                            | BU251_02905 | 10 | 2 | 3 | 0 | 0 | 3 | 0 |
| hypothetical protein                            | BU251_04040 | 22 | 4 | 5 | 0 | 0 | 2 | 2 |
| phenylacetate-coenzyme A ligase                 | BU251_04100 | 36 | 3 | 4 | 0 | 0 | 2 | 3 |
| D-erythrose-4-phosphate dehydrogenase           | BU251_05230 | 18 | 3 | 4 | 0 | 0 | 3 | 1 |
| tRNA pseudouridine(38-40) synthase TruA         | BU251_05365 | 30 | 3 | 0 | 0 | 0 | 2 | 0 |
| hypothetical protein                            | BU251_05375 | 18 | 4 | 2 | 0 | 0 | 2 | 2 |
| 50S ribosomal protein L32                       | BU251_05425 | 9  | 4 | 1 | 0 | 0 | 2 | 2 |
| UDP-N-acetylenolpyruvoylglucosamine reductase   | BU251_05735 | 33 | 3 | 4 | 0 | 0 | 3 | 1 |
| cold-shock protein                              | BU251_06340 | 7  | 0 | 0 | 0 | 0 | 5 | 1 |

|                                                                                 |             |    |   |   |   |   |   |   |
|---------------------------------------------------------------------------------|-------------|----|---|---|---|---|---|---|
| tRNA-specific adenosine deaminase                                               | BU251_06905 | 18 | 2 | 3 | 0 | 0 | 3 | 0 |
| hypothetical protein                                                            | BU251_06925 | 14 | 3 | 1 | 0 | 0 | 3 | 1 |
| tRNA dihydrouridine synthase DusB                                               | BU251_07165 | 36 | 3 | 4 | 0 | 0 | 3 | 1 |
| hypothetical protein                                                            | BU251_07460 | 11 | 3 | 1 | 0 | 0 | 2 | 0 |
| hypothetical protein                                                            | BU251_08050 | 37 | 3 | 4 | 0 | 0 | 2 | 3 |
| polysaccharide deacetylase                                                      | BU251_00415 | 32 | 1 | 1 | 1 | 1 | 3 | 1 |
| aspartate 1-decarboxylase                                                       | BU251_02110 | 13 | 1 | 1 | 0 | 0 | 4 | 1 |
| hypothetical protein                                                            | BU251_04205 | 13 | 2 | 2 | 0 | 0 | 3 | 0 |
| hypothetical protein                                                            | BU251_06930 | 25 | 0 | 0 | 0 | 0 | 5 | 2 |
| hypothetical protein                                                            | BU251_06965 | 18 | 2 | 3 | 0 | 0 | 3 | 1 |
| hypothetical protein                                                            | BU251_07505 | 21 | 4 | 2 | 0 | 0 | 1 | 1 |
| hypothetical protein                                                            | BU251_07925 | 17 | 2 | 3 | 0 | 0 | 3 | 1 |
| permease                                                                        | BU251_08260 | 29 | 3 | 1 | 0 | 0 | 2 | 3 |
| Type II/IV secretion system protein TadC,<br>associated with Flp pilus assembly | BU251_00155 | 34 | 2 | 2 | 0 | 0 | 3 | 4 |
| hypothetical protein                                                            | BU251_00470 | 14 | 4 | 0 | 0 | 0 | 0 | 0 |
| SsrA-binding protein                                                            | BU251_01410 | 18 | 3 | 1 | 0 | 0 | 1 | 1 |
| acetyltransferase                                                               | BU251_02355 | 26 | 2 | 0 | 0 | 0 | 2 | 0 |
| hypothetical protein                                                            | BU251_03825 | 13 | 2 | 2 | 0 | 0 | 3 | 4 |
| CDP-diacylglycerol--glycerol-3-phosphate 3-<br>phosphatidyltransferase          | BU251_05935 | 22 | 0 | 0 | 0 | 0 | 4 | 0 |
| beta-phosphoglucomutase                                                         | BU251_06790 | 24 | 1 | 1 | 0 | 0 | 3 | 0 |
| biopolymer transport protein ExbD/ToIR                                          | BU251_07590 | 16 | 4 | 1 | 0 | 0 | 0 | 0 |
| formate hydrogenlyase subunit 5                                                 | BU251_08625 | 59 | 2 | 2 | 0 | 0 | 3 | 4 |
| hypothetical protein                                                            | BU251_09350 | 25 | 1 | 1 | 0 | 0 | 3 | 1 |
| hypothetical protein                                                            | BU251_09445 | 18 | 4 | 6 | 0 | 0 | 0 | 0 |
| ABC transporter permease                                                        | BU251_00760 | 43 | 1 | 1 | 3 | 4 | 0 | 0 |
| protein containing Type IV pilus assembly PilZ<br>domain                        | BU251_00795 | 15 | 2 | 2 | 0 | 0 | 2 | 3 |
| putative deoxyribonuclease YjjV                                                 | BU251_02265 | 28 | 2 | 2 | 0 | 0 | 2 | 0 |

|                                                    |             |     |   |   |   |   |   |   |
|----------------------------------------------------|-------------|-----|---|---|---|---|---|---|
| phosphate transport system regulatory protein PhoU | BU251_02805 | 23  | 1 | 1 | 0 | 0 | 3 | 1 |
| heat-inducible transcription repressor HrcA        | BU251_02920 | 29  | 2 | 2 | 0 | 0 | 2 | 3 |
| tRNA pseudouridine 13 synthase                     | BU251_03670 | 44  | 2 | 2 | 0 | 0 | 2 | 3 |
| AmmeMemoRadiSam system radical SAM enzyme          | BU251_05155 | 43  | 2 | 2 | 0 | 0 | 2 | 3 |
| hypothetical protein                               | BU251_05360 | 59  | 2 | 2 | 0 | 0 | 2 | 3 |
| riboflavin biosynthesis protein RibD               | BU251_05880 | 40  | 3 | 4 | 0 | 0 | 1 | 1 |
| damage-inducible protein CinA                      | BU251_05905 | 16  | 1 | 1 | 0 | 0 | 3 | 1 |
| large-conductance mechanosensitive channel         | BU251_06495 | 10  | 3 | 1 | 0 | 0 | 1 | 1 |
| phosphoribosyltransferase                          | BU251_06820 | 23  | 2 | 3 | 0 | 0 | 2 | 2 |
| hypothetical protein                               | BU251_07740 | 28  | 3 | 1 | 0 | 0 | 1 | 1 |
| hypothetical protein                               | BU251_00025 | 30  | 2 | 2 | 0 | 0 | 2 | 2 |
| hypothetical protein                               | BU251_00075 | 14  | 2 | 0 | 0 | 0 | 1 | 1 |
| hypothetical protein                               | BU251_00410 | 41  | 2 | 3 | 0 | 0 | 1 | 1 |
| HesA/MoeB/ThiF family protein                      | BU251_02275 | 27  | 1 | 1 | 0 | 0 | 2 | 3 |
| 30S ribosomal protein S19                          | BU251_03110 | 11  | 2 | 0 | 0 | 0 | 1 | 1 |
| hypothetical protein                               | BU251_04600 | 31  | 2 | 2 | 0 | 0 | 2 | 2 |
| hypothetical protein                               | BU251_05115 | 110 | 2 | 2 | 0 | 0 | 2 | 2 |
| 1-acyl-sn-glycerol-3-phosphate acyltransferase     | BU251_05525 | 22  | 2 | 0 | 0 | 0 | 1 | 1 |
| cation efflux protein                              | BU251_06300 | 34  | 2 | 3 | 0 | 0 | 1 | 1 |
| glutamate synthase large subunit                   | BU251_06815 | 167 | 0 | 0 | 0 | 0 | 3 | 4 |
| hypothetical protein                               | BU251_06970 | 26  | 3 | 0 | 0 | 0 | 0 | 0 |
| hypothetical protein                               | BU251_07065 | 51  | 2 | 3 | 0 | 0 | 1 | 1 |
| electron transport complex protein RnfB            | BU251_07545 | 29  | 2 | 3 | 0 | 0 | 1 | 1 |
| hypothetical protein                               | BU251_07960 | 16  | 2 | 3 | 1 | 1 | 0 | 0 |
| hypothetical protein                               | BU251_08000 | 10  | 1 | 1 | 0 | 0 | 2 | 0 |
| hypothetical protein                               | BU251_08125 | 28  | 1 | 1 | 0 | 0 | 2 | 0 |
| hypothetical protein                               | BU251_09060 | 7   | 2 | 2 | 0 | 0 | 2 | 2 |
| hypothetical protein                               | BU251_00040 | 10  | 1 | 1 | 0 | 0 | 2 | 2 |
| sugar ABC transporter permease                     | BU251_00200 | 35  | 0 | 0 | 0 | 0 | 3 | 4 |

|                                                                    |             |    |   |   |   |   |   |   |
|--------------------------------------------------------------------|-------------|----|---|---|---|---|---|---|
| tRNA (5-methylaminomethyl-2-thiouridylate)-methyltransferase       | BU251_00310 | 40 | 1 | 1 | 0 | 0 | 2 | 2 |
| 30S ribosomal protein S18                                          | BU251_00650 | 13 | 1 | 1 | 0 | 0 | 2 | 2 |
| hypothetical protein                                               | BU251_03575 | 18 | 3 | 1 | 0 | 0 | 0 | 0 |
| thiamine-phosphate diphosphorylase                                 | BU251_03765 | 21 | 0 | 0 | 0 | 0 | 3 | 1 |
| acyl-phosphate glycerol 3-phosphate acyltransferase                | BU251_03880 | 24 | 3 | 4 | 0 | 0 | 0 | 0 |
| hypothetical protein                                               | BU251_04155 | 43 | 1 | 1 | 0 | 0 | 2 | 2 |
| Na(+) H(+) antiporter subunit A                                    | BU251_04550 | 67 | 2 | 2 | 0 | 0 | 1 | 1 |
| phosphate ABC transporter, permease protein PstA                   | BU251_06655 | 31 | 2 | 2 | 0 | 0 | 1 | 1 |
| hypothetical protein                                               | BU251_06975 | 27 | 2 | 2 | 0 | 0 | 1 | 1 |
| hypothetical protein                                               | BU251_08130 | 20 | 2 | 2 | 0 | 0 | 1 | 1 |
| hypothetical protein                                               | BU251_08760 | 55 | 1 | 1 | 0 | 0 | 2 | 2 |
| catabolite repression HPr-like protein Crh                         | BU251_00875 | 11 | 0 | 0 | 0 | 0 | 2 | 0 |
| tRNA(Cytosine32)-2-thiocytidine synthetase                         | BU251_01485 | 29 | 2 | 3 | 0 | 0 | 0 | 0 |
| [FeFe]-hydrogenase maturation protein HydF                         | BU251_02050 | 45 | 1 | 1 | 0 | 0 | 1 | 1 |
| four helix bundle protein                                          | BU251_02730 | 15 | 1 | 1 | 0 | 0 | 1 | 1 |
| CDP-diacylglycerol--glycerol-3-phosphate 3-phosphatidyltransferase | BU251_03885 | 22 | 1 | 1 | 0 | 0 | 1 | 1 |
| hypothetical protein                                               | BU251_04075 | 38 | 1 | 1 | 0 | 0 | 1 | 1 |
| hypothetical protein                                               | BU251_04190 | 10 | 0 | 0 | 0 | 0 | 2 | 3 |
| hypothetical protein                                               | BU251_04310 | 48 | 2 | 3 | 0 | 0 | 0 | 0 |
| hypothetical protein                                               | BU251_05580 | 14 | 2 | 0 | 0 | 0 | 0 | 0 |
| hypothetical protein                                               | BU251_06245 | 27 | 2 | 3 | 0 | 0 | 0 | 0 |
| hypothetical protein                                               | BU251_06430 | 18 | 1 | 1 | 0 | 0 | 1 | 1 |
| hypothetical protein                                               | BU251_06455 | 17 | 2 | 0 | 0 | 0 | 0 | 0 |
| UDP-N-acetylmuramate--L-alanine ligase                             | BU251_06500 | 11 | 1 | 1 | 0 | 0 | 1 | 1 |
| hypothetical protein                                               | BU251_06985 | 17 | 1 | 1 | 0 | 0 | 1 | 1 |
| hypothetical protein                                               | BU251_08330 | 59 | 1 | 1 | 1 | 1 | 0 | 0 |
| hypothetical protein                                               | BU251_08795 | 26 | 2 | 0 | 0 | 0 | 0 | 0 |

|                                                    |             |     |   |   |   |   |   |   |
|----------------------------------------------------|-------------|-----|---|---|---|---|---|---|
| DNA-directed RNA polymerase subunit omega          | BU251_09510 | 8   | 1 | 1 | 0 | 0 | 1 | 1 |
| type II secretion system protein F                 | BU251_00150 | 31  | 2 | 2 | 0 | 0 | 0 | 0 |
| hypothetical protein                               | BU251_01360 | 11  | 2 | 2 | 0 | 0 | 0 | 0 |
| RND family efflux transporter MFP subunit          | BU251_03420 | 32  | 0 | 0 | 0 | 0 | 2 | 2 |
| ATP phosphoribosyltransferase regulatory subunit   | BU251_03500 | 7   | 2 | 2 | 0 | 0 | 0 | 0 |
| hypothetical protein                               | BU251_03715 | 10  | 0 | 0 | 0 | 0 | 2 | 2 |
| hypothetical protein                               | BU251_04085 | 38  | 0 | 0 | 0 | 0 | 2 | 2 |
| hypothetical protein                               | BU251_04120 | 42  | 2 | 2 | 0 | 0 | 0 | 0 |
| hypothetical protein                               | BU251_04135 | 38  | 0 | 0 | 0 | 0 | 2 | 2 |
| hypothetical protein                               | BU251_04460 | 21  | 0 | 0 | 0 | 0 | 2 | 2 |
| NADH-ubiquinone oxidoreductase chain H             | BU251_04510 | 35  | 0 | 0 | 0 | 0 | 2 | 2 |
| hypothetical protein                               | BU251_05235 | 7   | 2 | 2 | 0 | 0 | 0 | 0 |
| nicotinamidase                                     | BU251_06795 | 24  | 2 | 2 | 0 | 0 | 0 | 0 |
| hypothetical protein                               | BU251_08025 | 52  | 0 | 0 | 0 | 0 | 2 | 2 |
| endonuclease                                       | BU251_08090 | 25  | 0 | 0 | 0 | 0 | 2 | 2 |
| hypothetical protein                               | BU251_08790 | 114 | 0 | 0 | 0 | 0 | 2 | 2 |
| hypothetical protein                               | BU251_00435 | 20  | 0 | 0 | 0 | 0 | 1 | 1 |
| periplasmic divalent cation tolerance protein CutA | BU251_00505 | 12  | 0 | 0 | 0 | 0 | 1 | 1 |
| anti-sigma-W factor RsiW                           | BU251_01470 | 20  | 0 | 0 | 0 | 0 | 1 | 1 |
| xanthine dehydrogenase iron-sulfur subunit         | BU251_01520 | 17  | 0 | 0 | 0 | 0 | 1 | 1 |
| hypothetical protein                               | BU251_01895 | 12  | 1 | 1 | 0 | 0 | 0 | 0 |
| transcriptional regulator                          | BU251_01900 | 9   | 0 | 0 | 0 | 0 | 1 | 1 |
| hypothetical protein                               | BU251_02280 | 11  | 1 | 1 | 0 | 0 | 0 | 0 |
| hypothetical protein                               | BU251_02390 | 13  | 0 | 0 | 0 | 0 | 1 | 1 |
| gamma-glutamylcyclotransferase                     | BU251_02450 | 17  | 1 | 1 | 0 | 0 | 0 | 0 |
| hypothetical protein                               | BU251_03345 | 25  | 0 | 0 | 0 | 0 | 1 | 1 |
| hypothetical protein                               | BU251_03720 | 22  | 0 | 0 | 0 | 0 | 1 | 1 |
| hypothetical protein                               | BU251_04200 | 13  | 1 | 1 | 0 | 0 | 0 | 0 |
| hypothetical protein                               | BU251_04410 | 45  | 1 | 1 | 0 | 0 | 0 | 0 |

|                                                                                         |             |    |   |   |   |   |   |   |
|-----------------------------------------------------------------------------------------|-------------|----|---|---|---|---|---|---|
| hydrogenase-4 component B / Formate hydrogenlyase subunit 3                             | BU251_04545 | 51 | 1 | 1 | 0 | 0 | 0 | 0 |
| tRNA (adenosine(37)-N6)-threonylcarbamoyltransferase complex transferase subunit TsaD   | BU251_04995 | 35 | 0 | 0 | 0 | 0 | 1 | 1 |
| hypothetical protein                                                                    | BU251_05240 | 22 | 1 | 1 | 0 | 0 | 0 | 0 |
| diadenosine tetraphosphatase                                                            | BU251_05860 | 27 | 0 | 0 | 0 | 0 | 1 | 1 |
| hypothetical protein                                                                    | BU251_05980 | 10 | 0 | 0 | 0 | 0 | 1 | 1 |
| hypothetical protein                                                                    | BU251_05985 | 13 | 1 | 1 | 0 | 0 | 0 | 0 |
| ABC-type transport system involved in resistanceto organic solvents, permease component | BU251_06180 | 28 | 0 | 0 | 0 | 0 | 1 | 1 |
| gltD                                                                                    | BU251_06810 | 51 | 0 | 0 | 0 | 0 | 1 | 1 |
| hypothetical protein                                                                    | BU251_07425 | 17 | 0 | 0 | 0 | 0 | 1 | 1 |
| hypothetical protein                                                                    | BU251_08100 | 44 | 0 | 0 | 0 | 0 | 1 | 1 |
| hypothetical protein                                                                    | BU251_08235 | 20 | 1 | 1 | 0 | 0 | 0 | 0 |
| formate hydrogenlyase subunit 7                                                         | BU251_08620 | 19 | 0 | 0 | 0 | 0 | 1 | 1 |
| hypothetical protein                                                                    | BU251_08770 | 29 | 0 | 0 | 0 | 0 | 1 | 1 |
| K <sup>+</sup> /H <sup>+</sup> antiporter                                               | BU251_09115 | 53 | 0 | 0 | 1 | 1 | 0 | 0 |
| hypothetical protein                                                                    | BU251_09125 | 14 | 1 | 1 | 0 | 0 | 0 | 0 |
